# Supplementary material for: Synthesis of spirooxindoles fused with pyrazolo-tetrahydropyridinone and coumarin-dihydropyridine-pyrazole tetracycles by reaction medium dependent isatin-based multicomponent reactions
Source: Royal Society of Chemistry journal article supplement (doi:10.1039/c8nj05465g), 2018-12-28
Supplement: c8nj05465g1.pdf [file c8nj05465g1.pdf]

## Supporting information

### Synthesis of spirooxindoles fused with pyrazolo-tetrahydropyridinone and coumarin-dihydropyridine-pyrazole tetracycles by reaction medium dependent isatin-based multicomponent reactions

Richa Mishra, Asim Jana, Anoop Kumar Panday and Lokman H. Choudhury\*

*Department of Chemistry, Indian Institute of Technology Patna, Bihta, Patna-801103, India*

---

E-mail: lokman@iitp.ac.in, [lokman.iitp@gmail.com](mailto:lokman.iitp@gmail.com)

#### Table of contents:

1. Copies of  $^1\text{H}$  and  $^{13}\text{C}$  NMR spectra of compounds.....S2-S43.
2. Crystal structure description of **5a**.....S 44- S47.

# Copies of $^1\text{H}$ and $^{13}\text{C}$ spectrum of compound **4a**

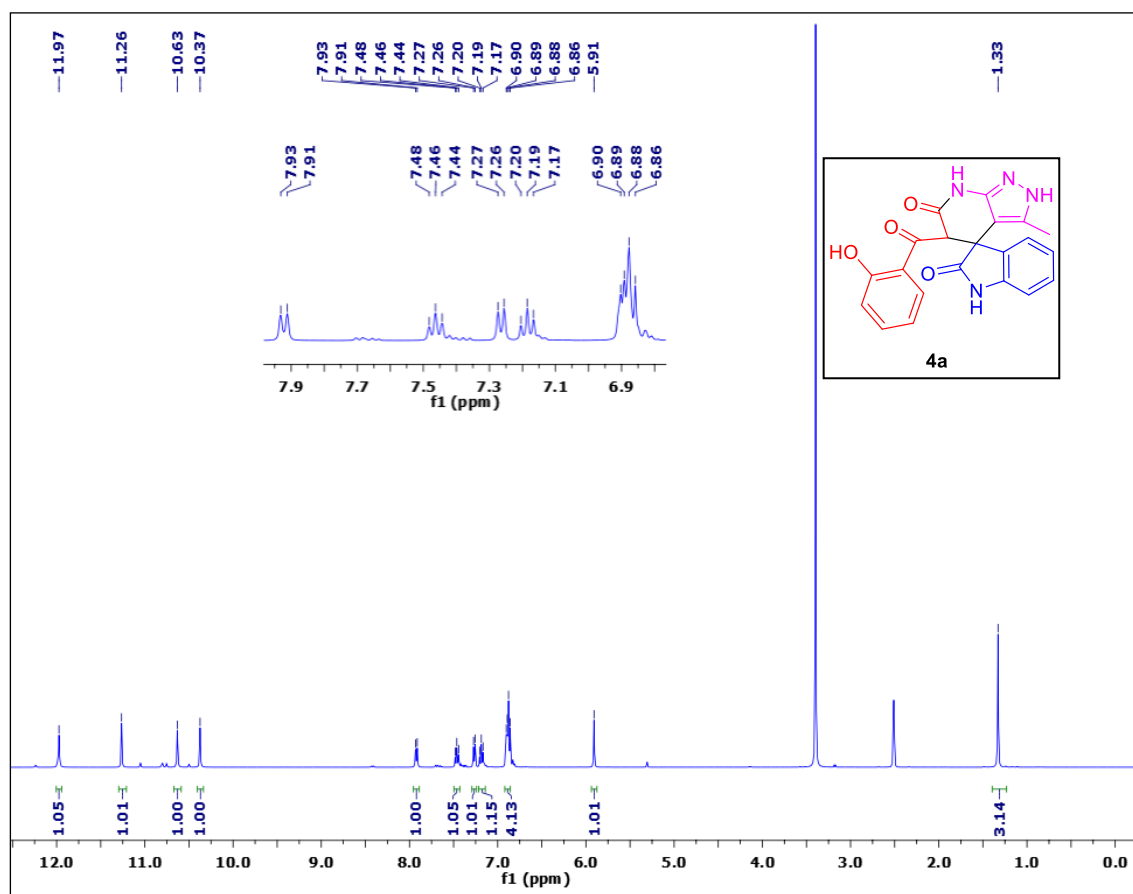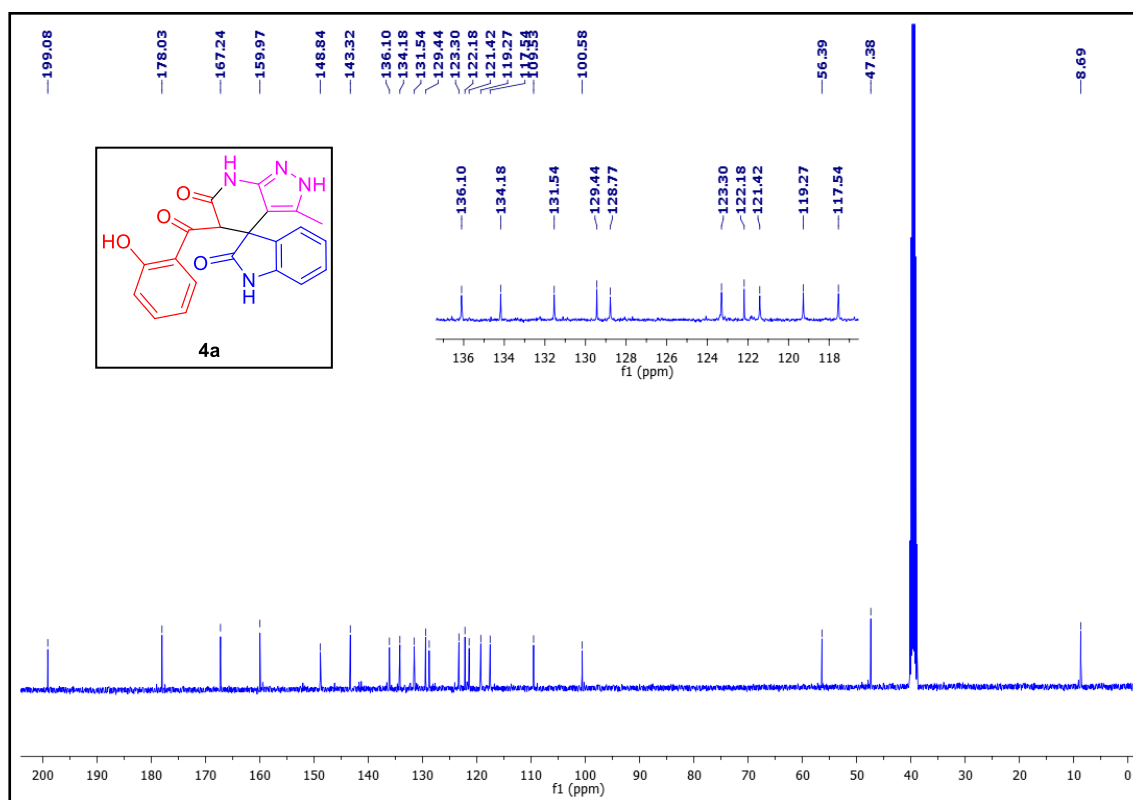

Copies of  $^1\text{H}$  and  $^{13}\text{C}$  spectrum of compound 4b

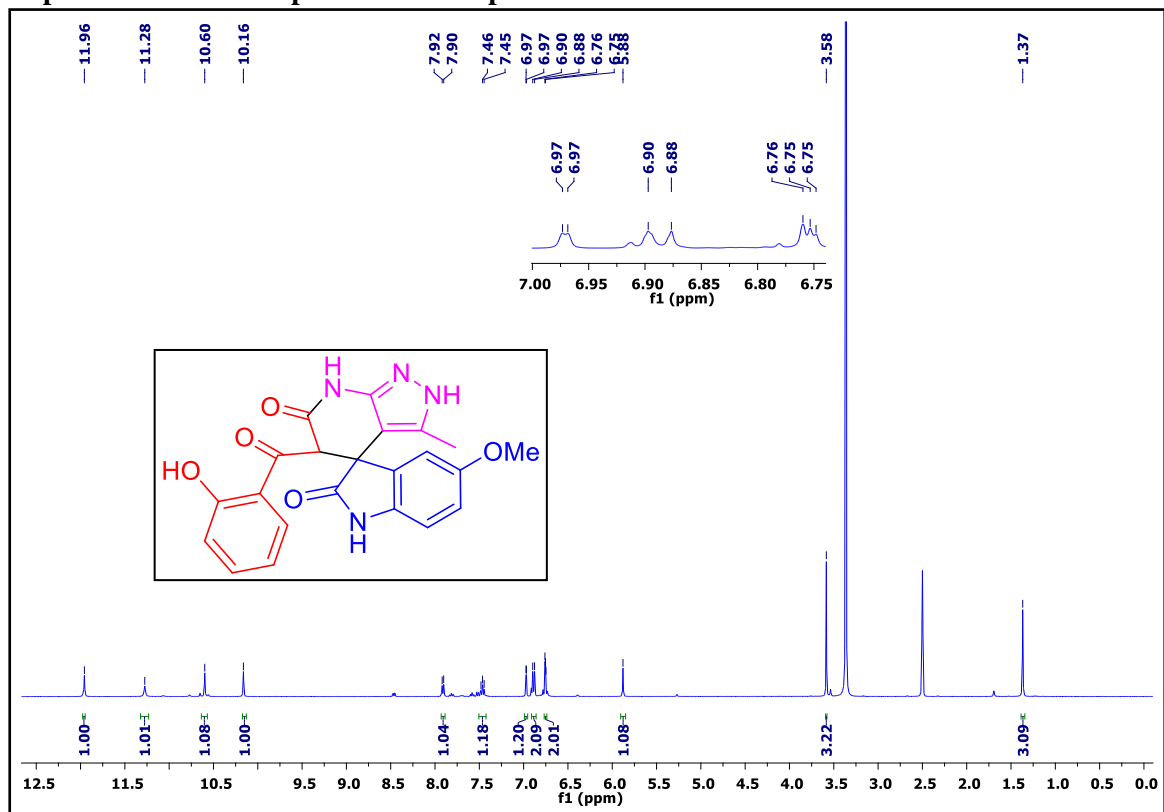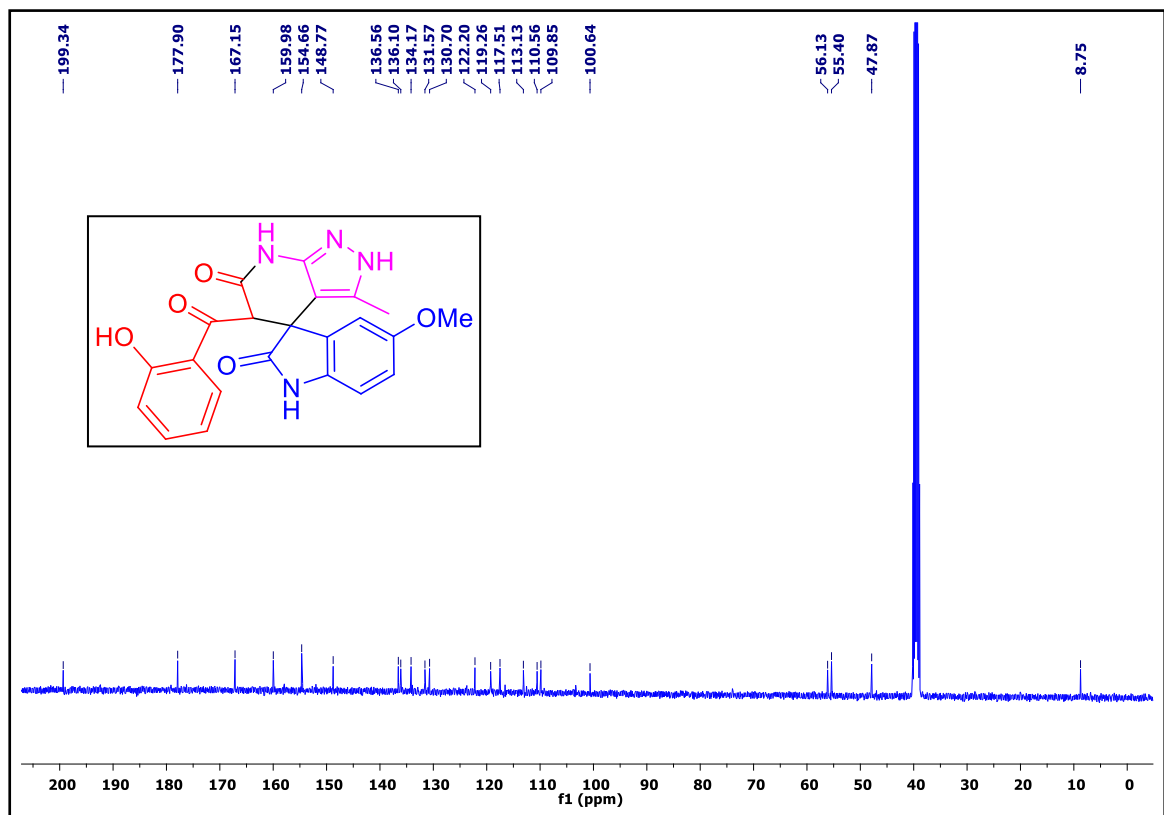

Copies of  $^1\text{H}$  and  $^{13}\text{C}$  spectrum of compound **4c**

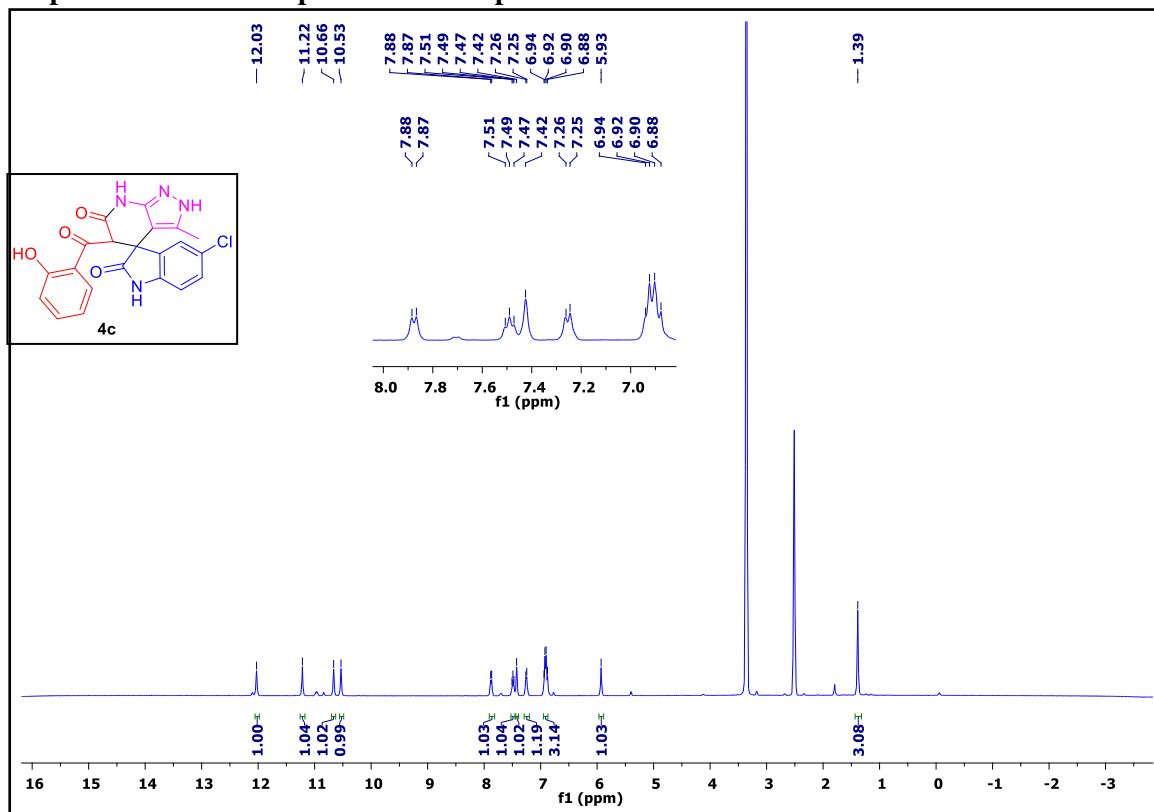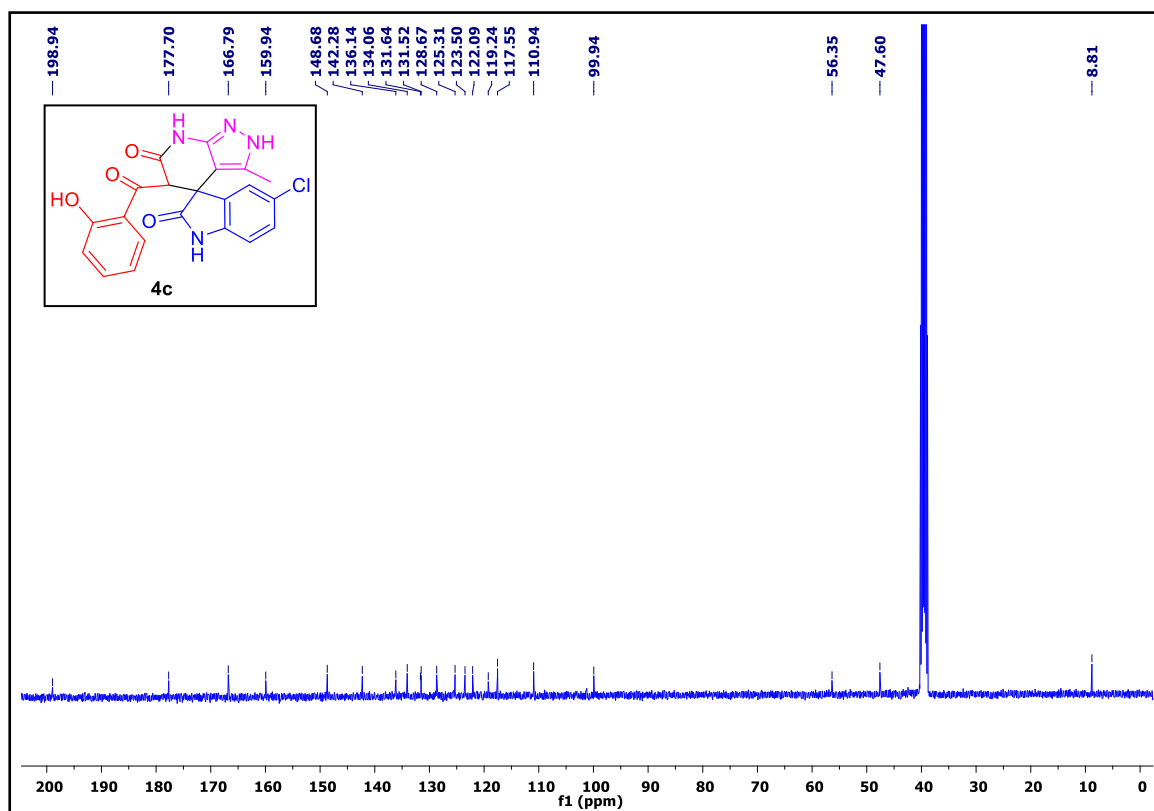

# Copies of $^1\text{H}$ and $^{13}\text{C}$ spectrum of compound 4d

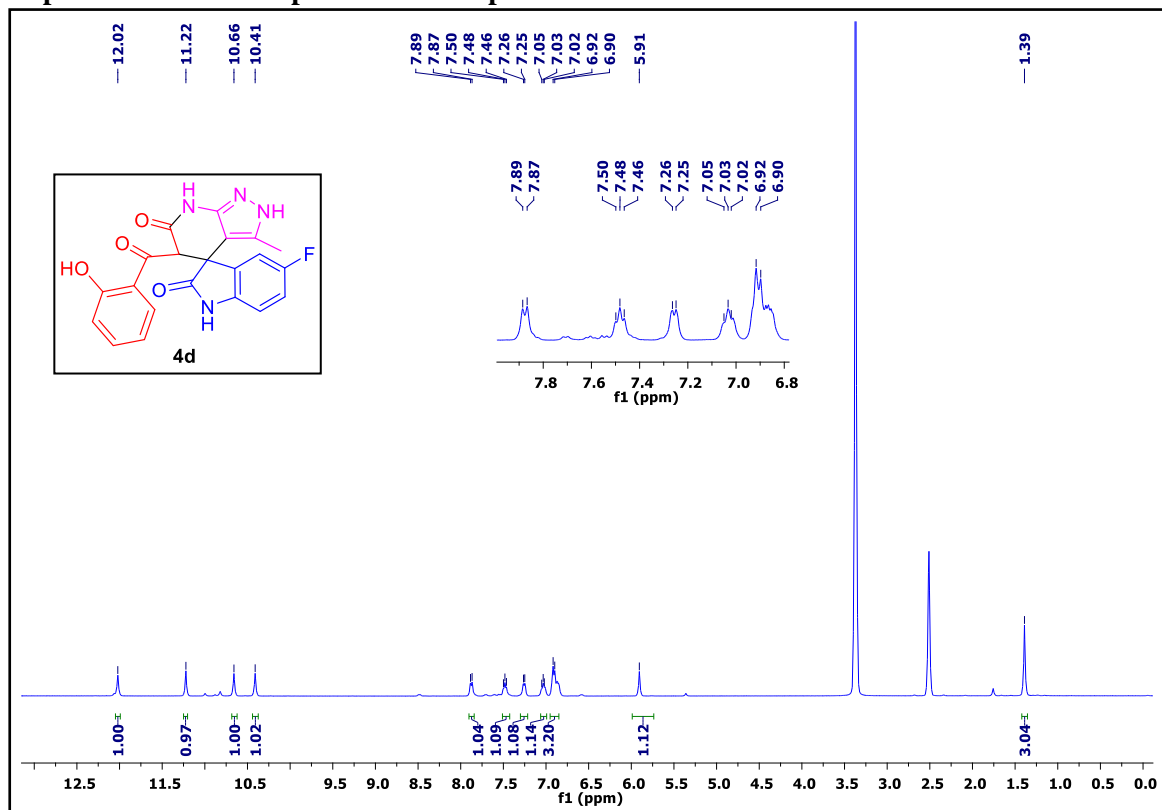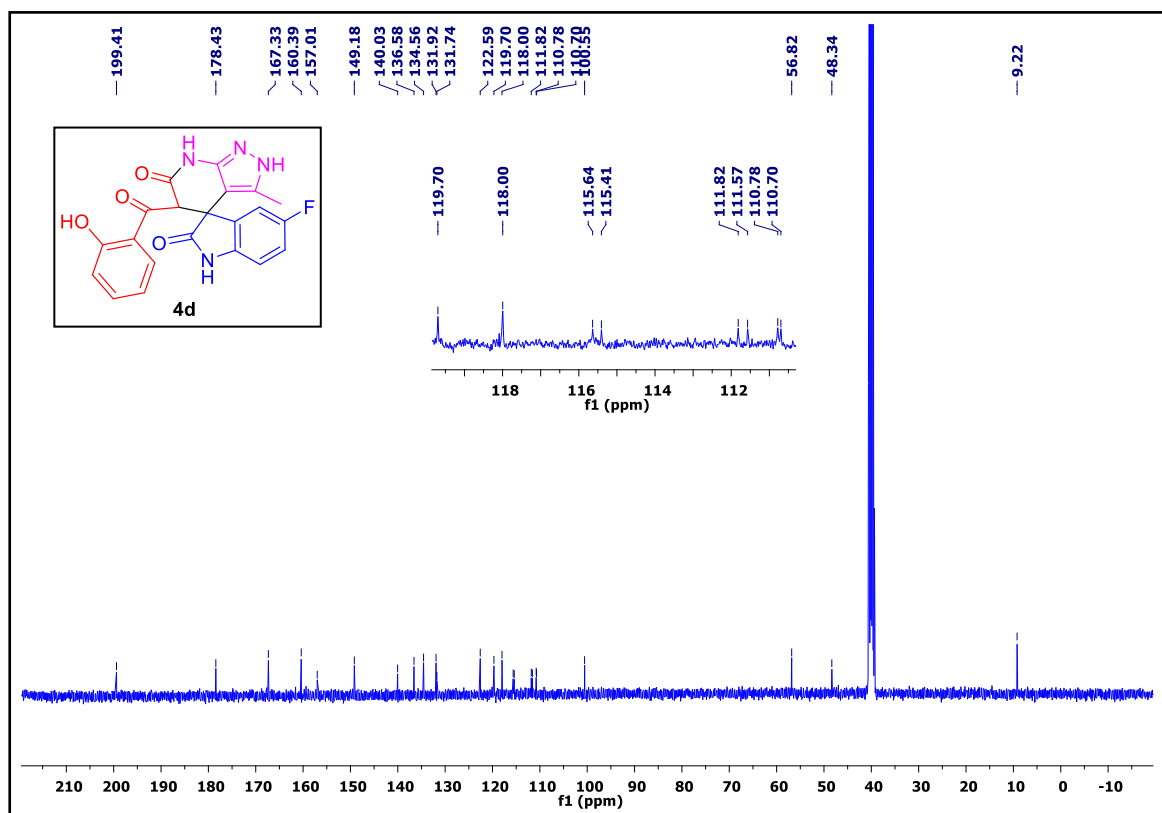

Copies of  $^1\text{H}$  and  $^{13}\text{C}$  spectrum of compound **4e**

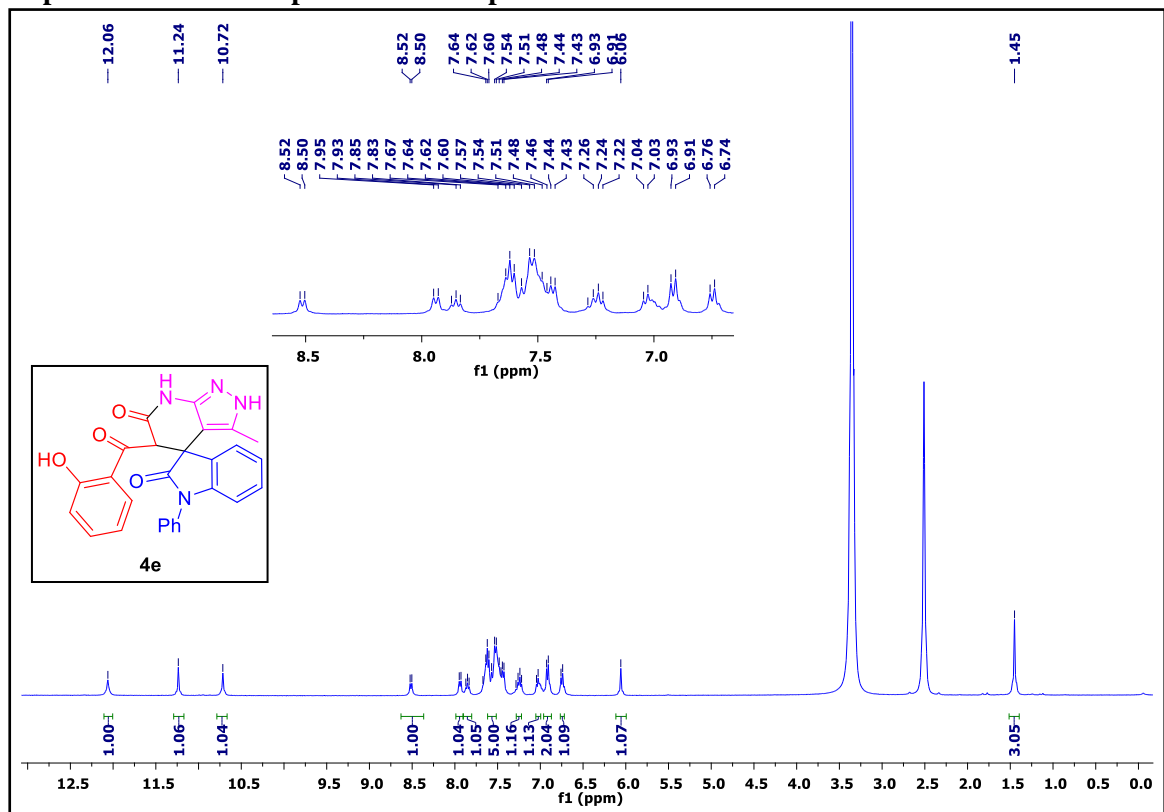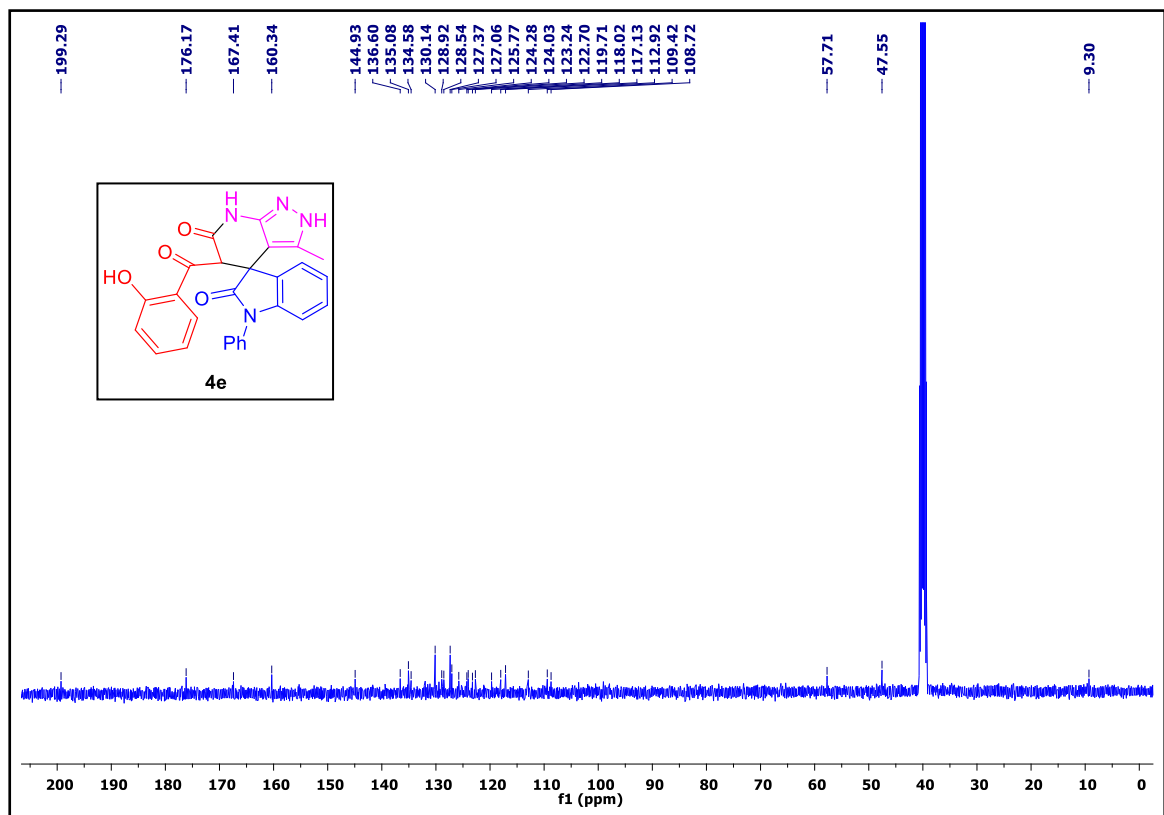

# Copies of $^1\text{H}$ and $^{13}\text{C}$ spectrum of compound 4f

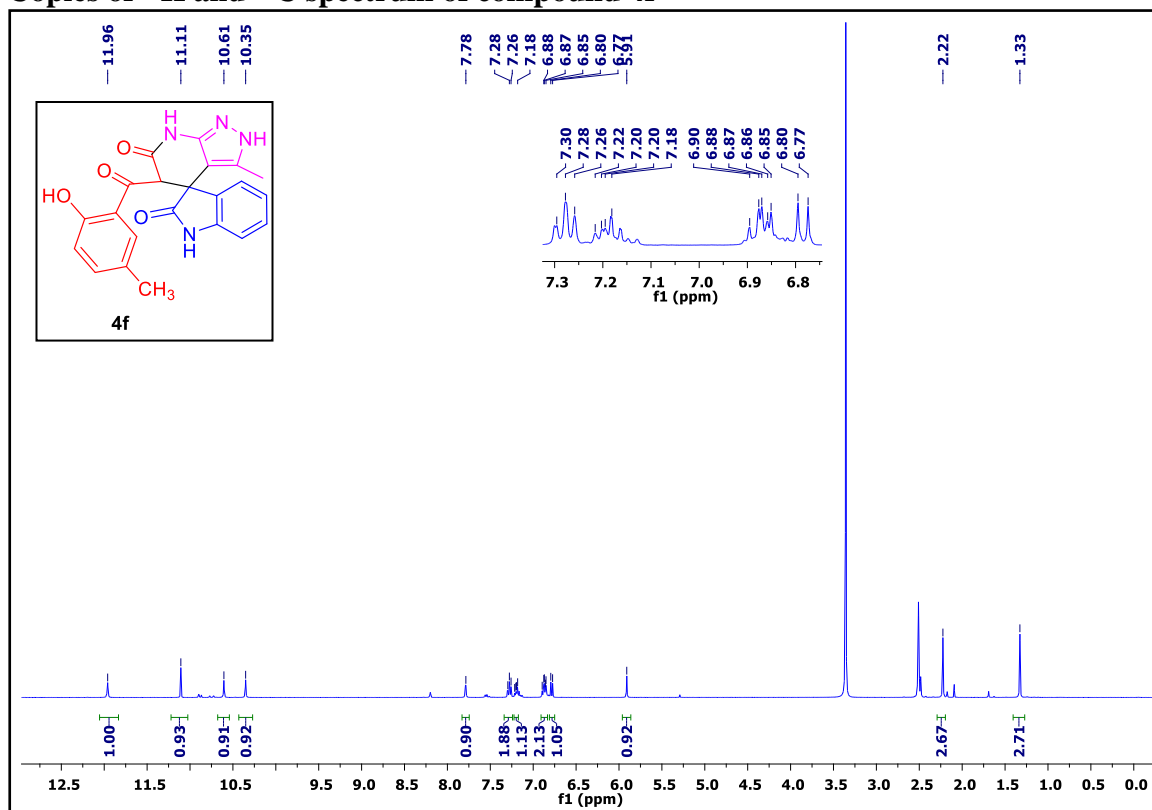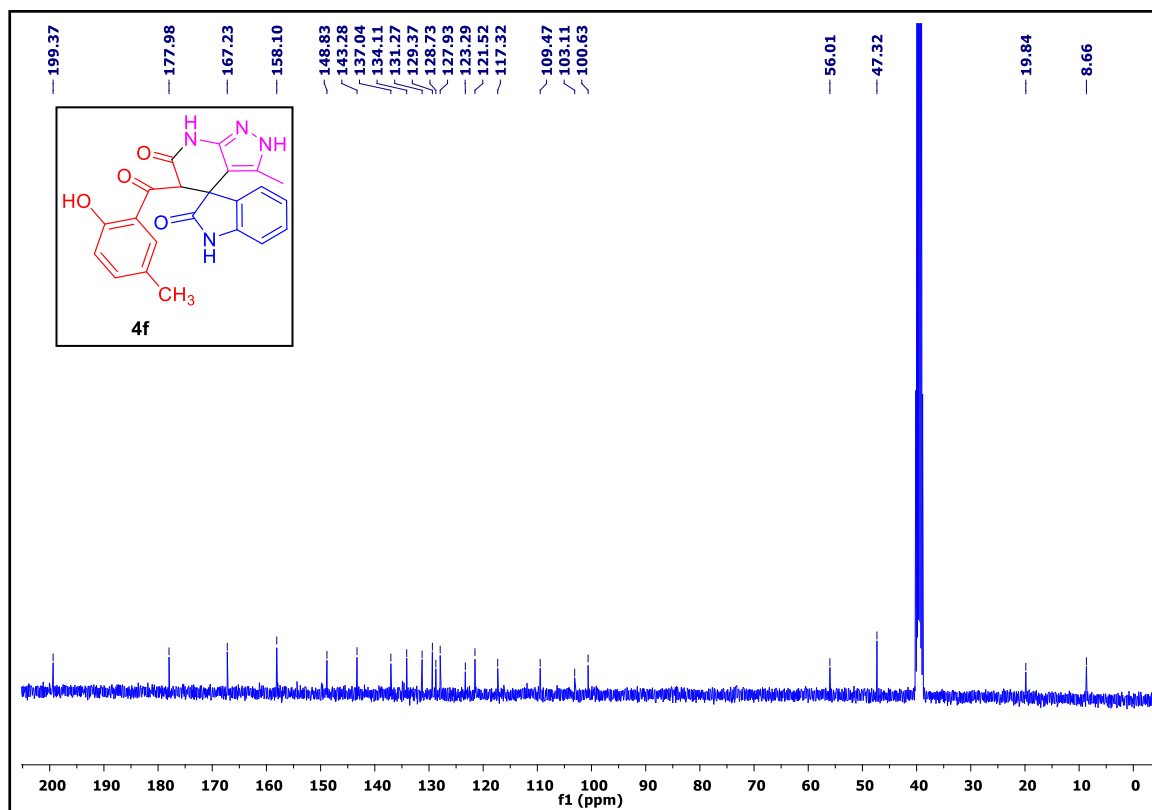

Copies of  $^1\text{H}$  and  $^{13}\text{C}$  spectrum of compound **4g**

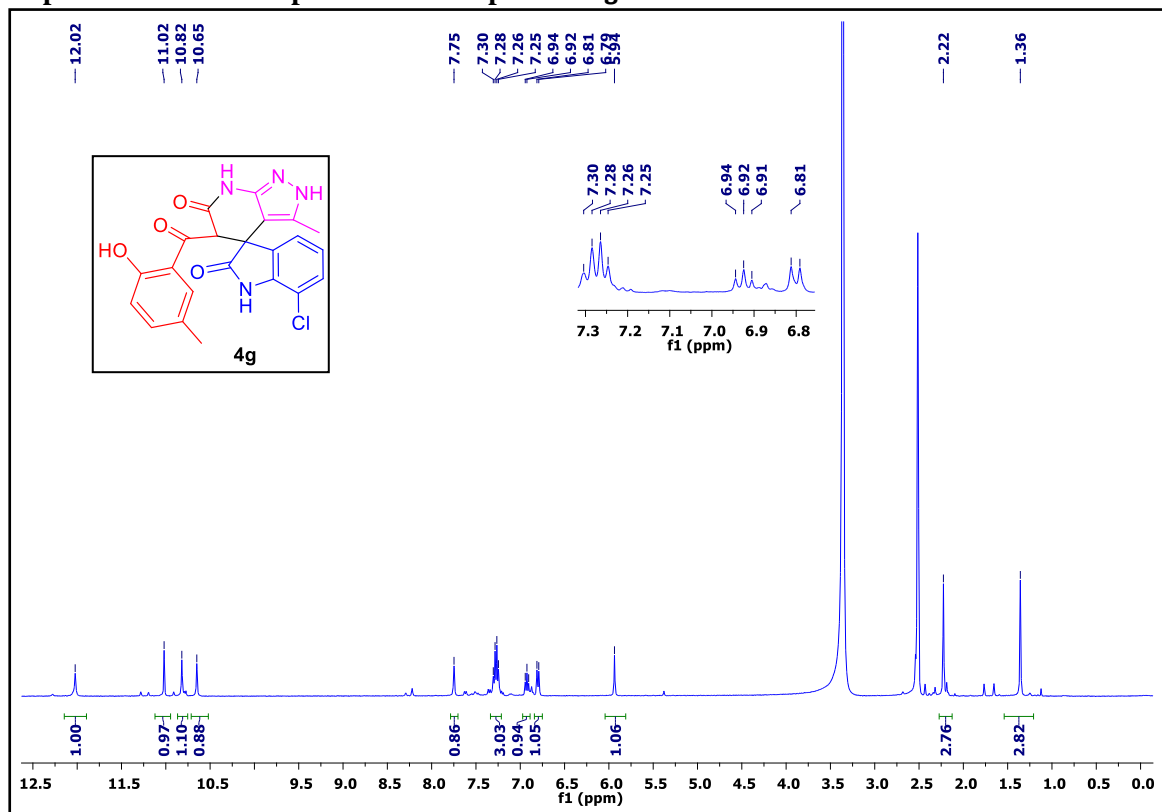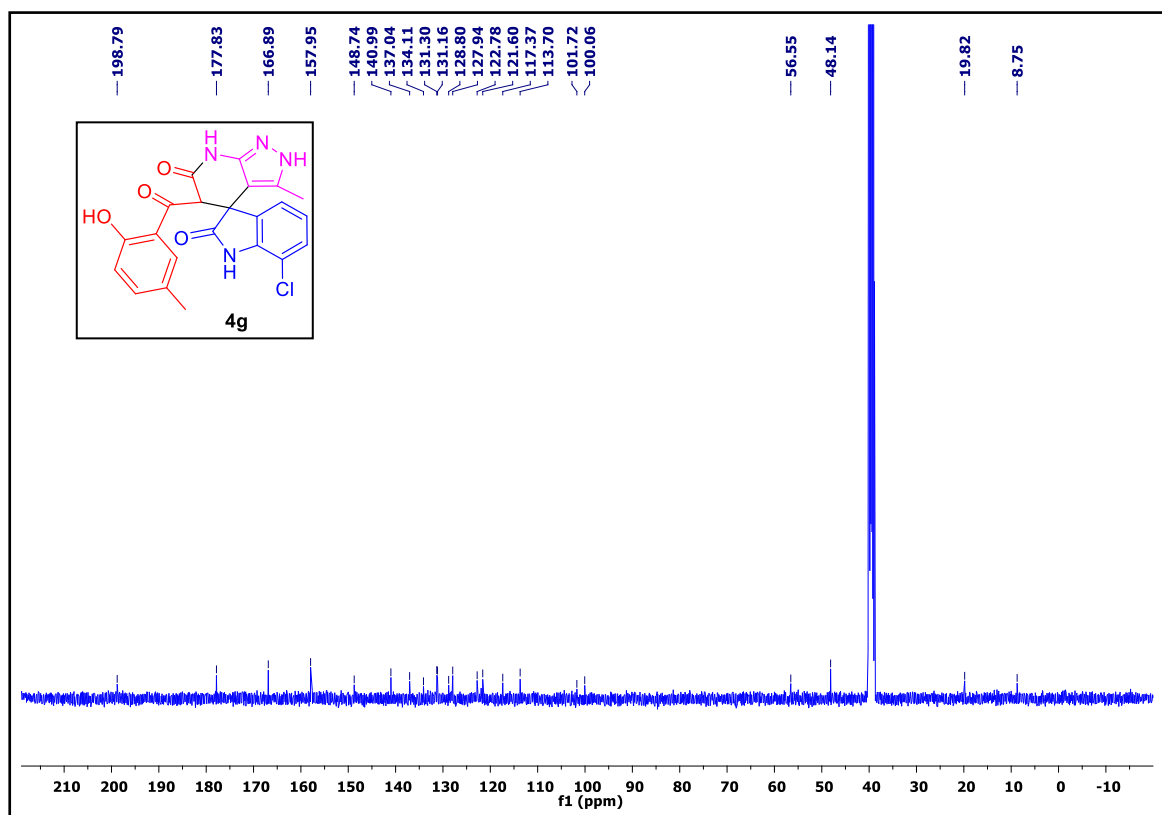



Copies of  $^1\text{H}$  and  $^{13}\text{C}$  spectrum of compound 4h

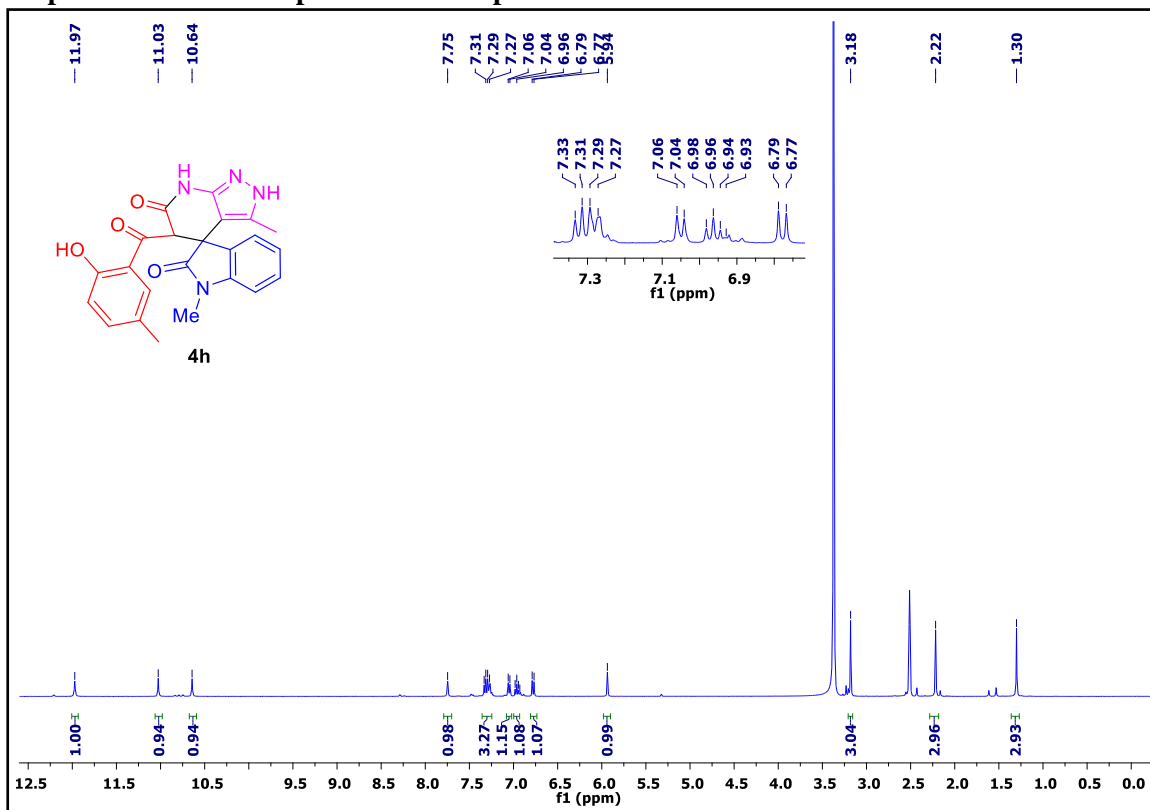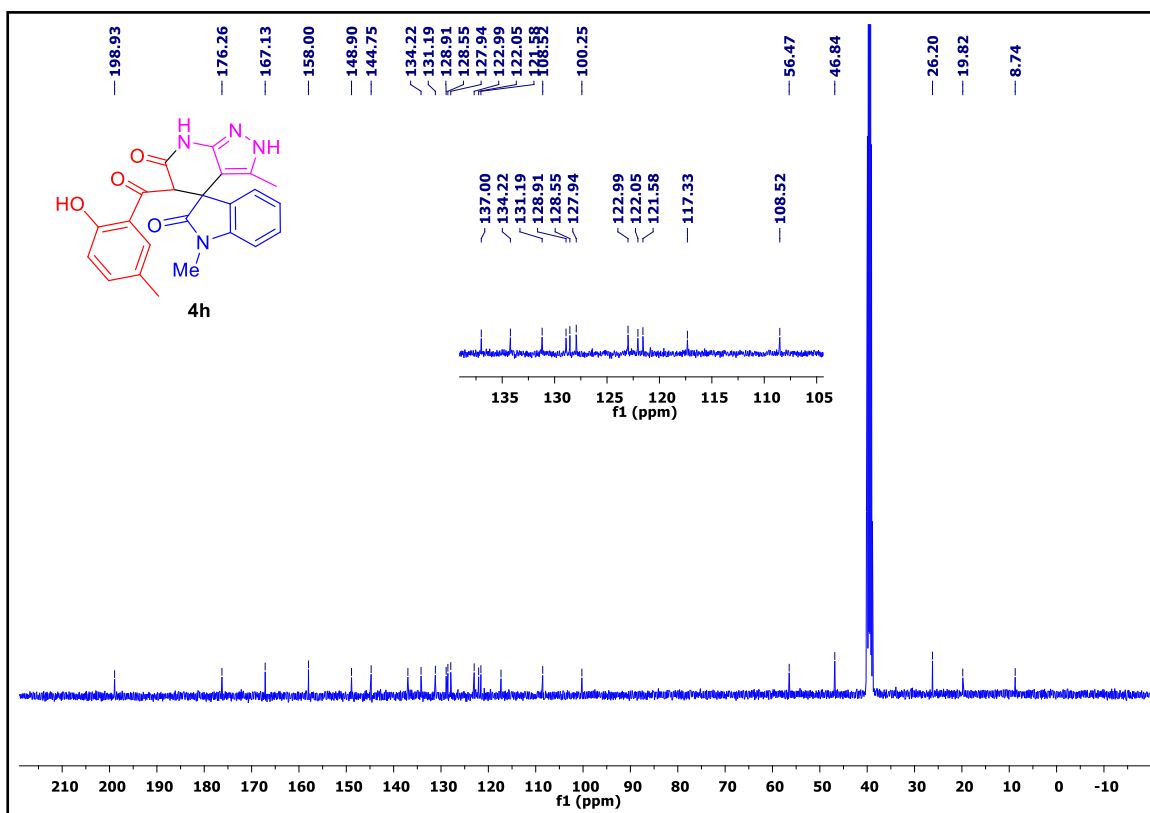

Copies of  $^1\text{H}$  and  $^{13}\text{C}$  spectrum of compound 4i

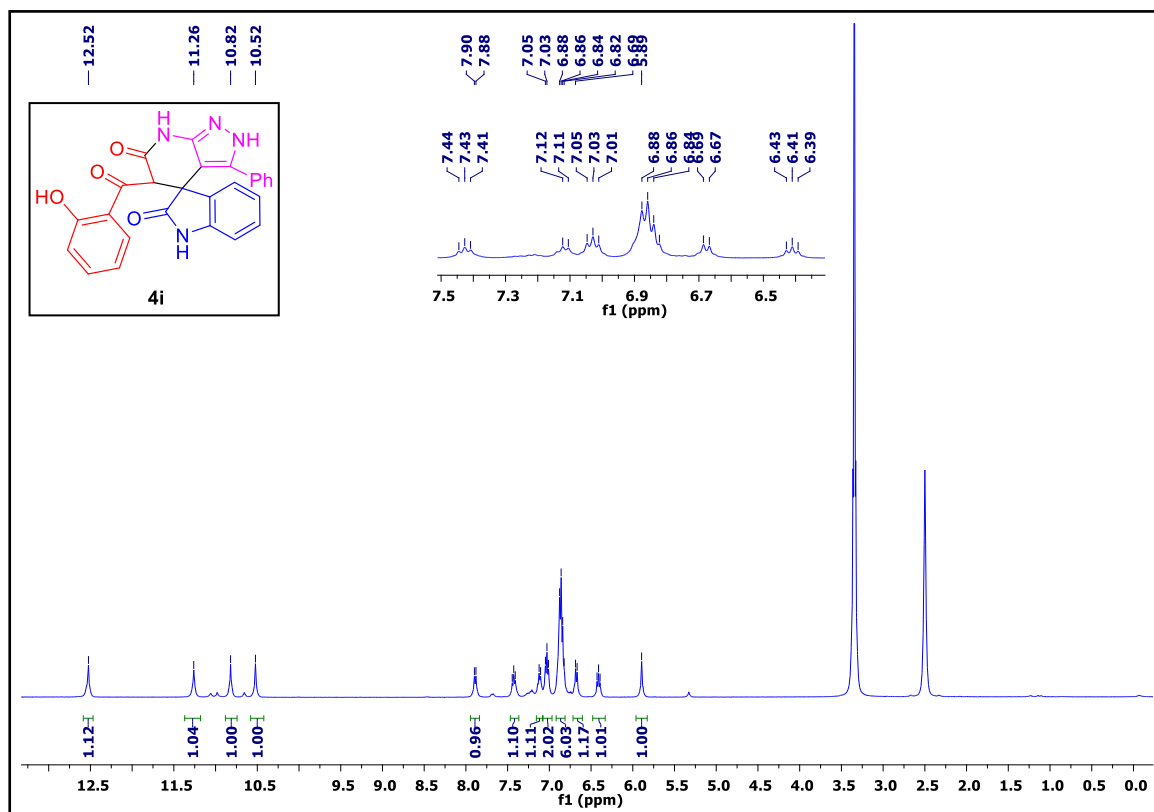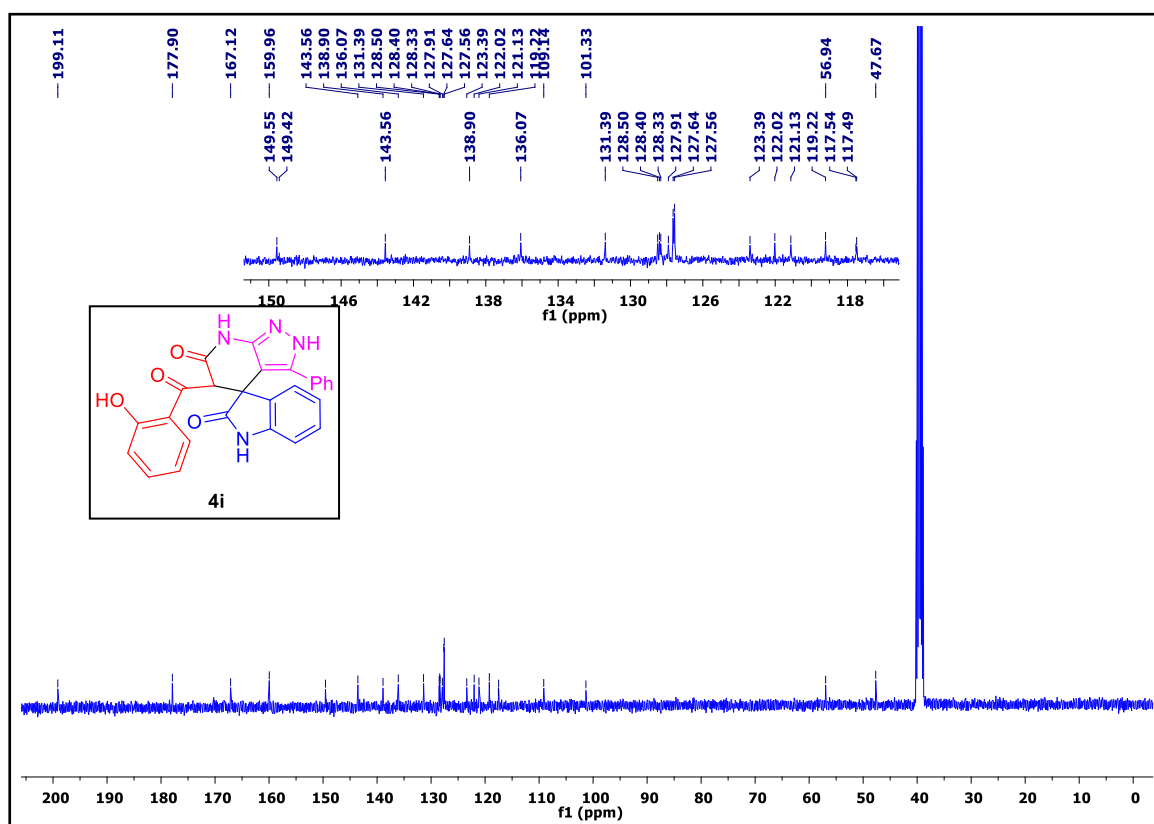

Copies of  $^1\text{H}$  and  $^{13}\text{C}$  spectrum of compound **4j**

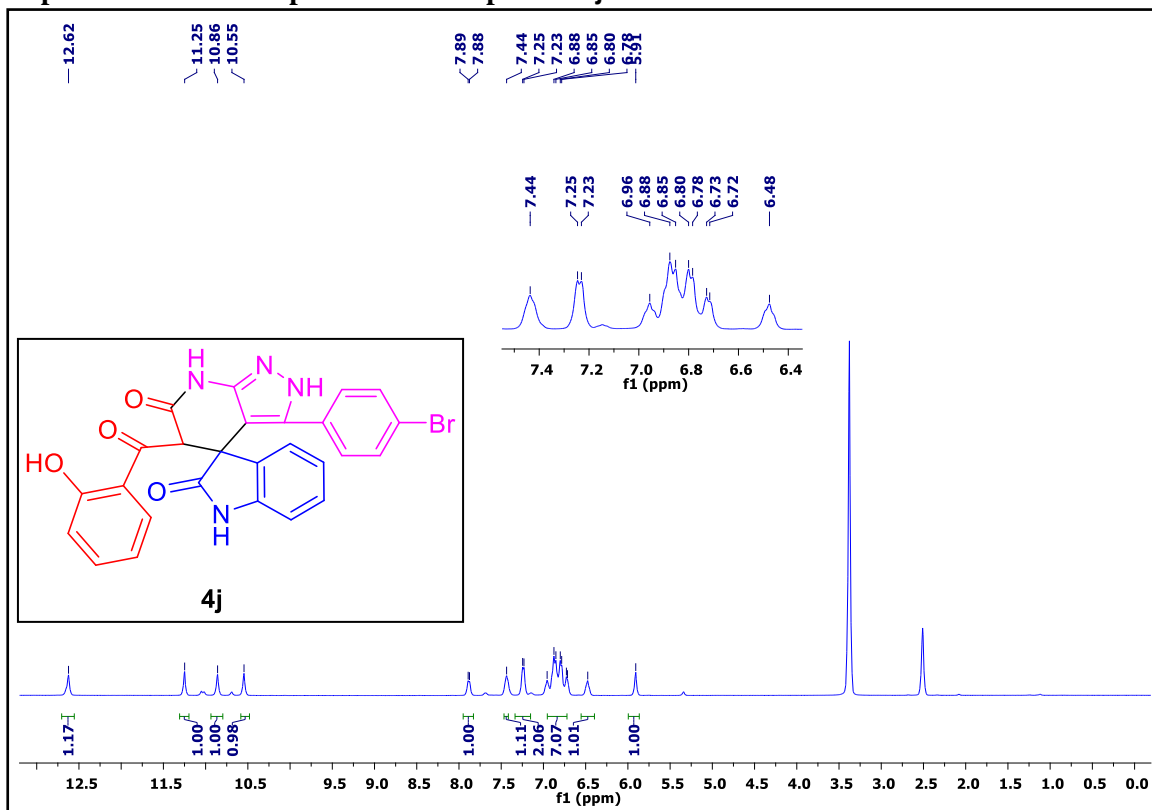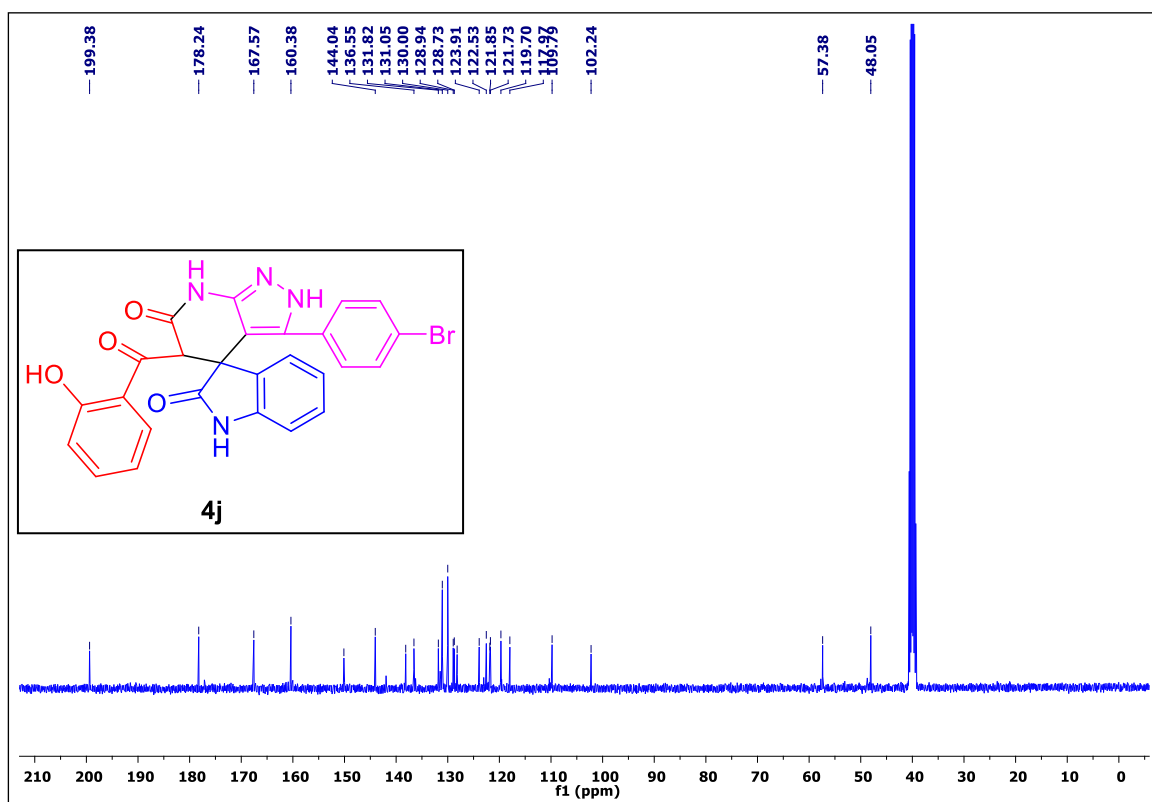

Copies of  $^1\text{H}$  and  $^{13}\text{C}$  spectrum of compound 5a

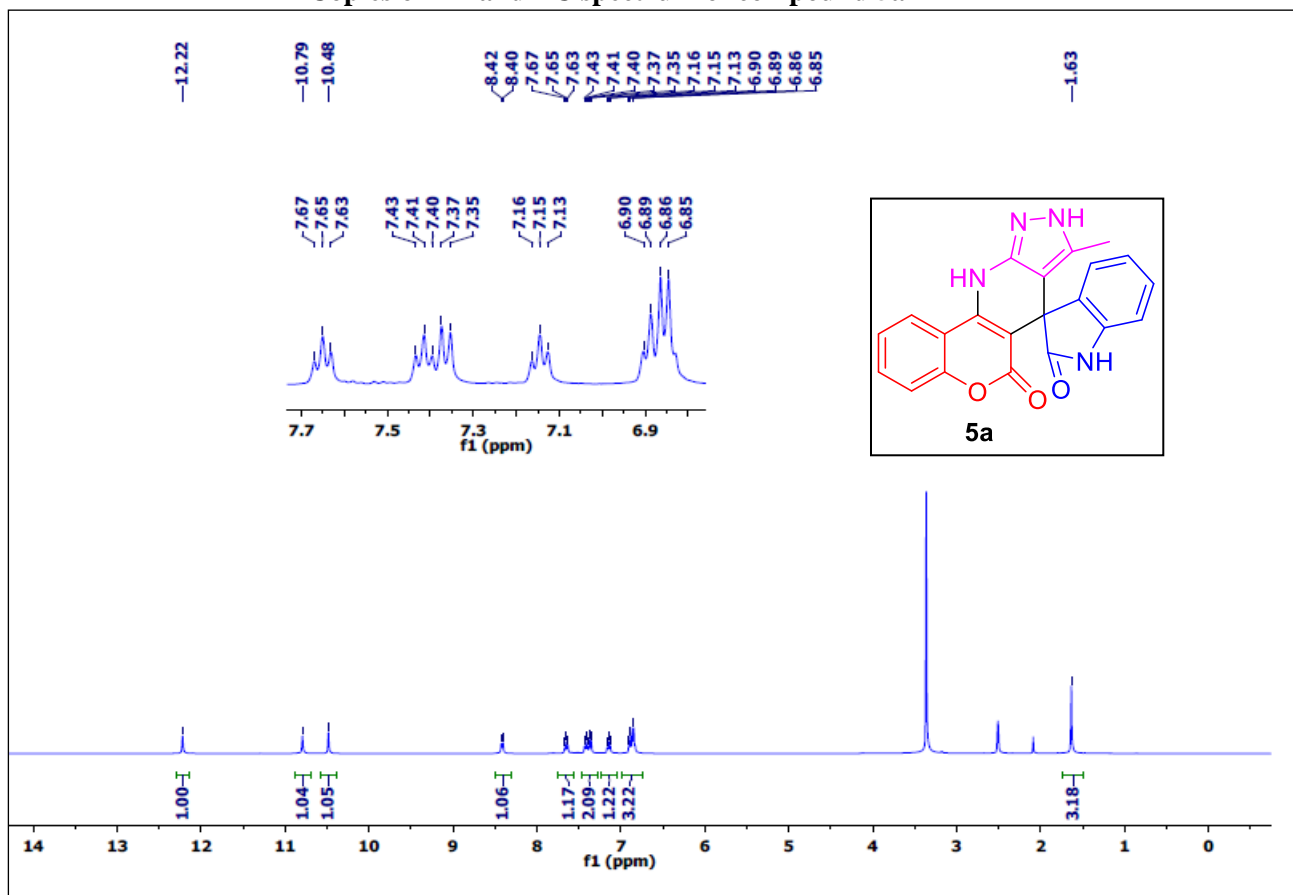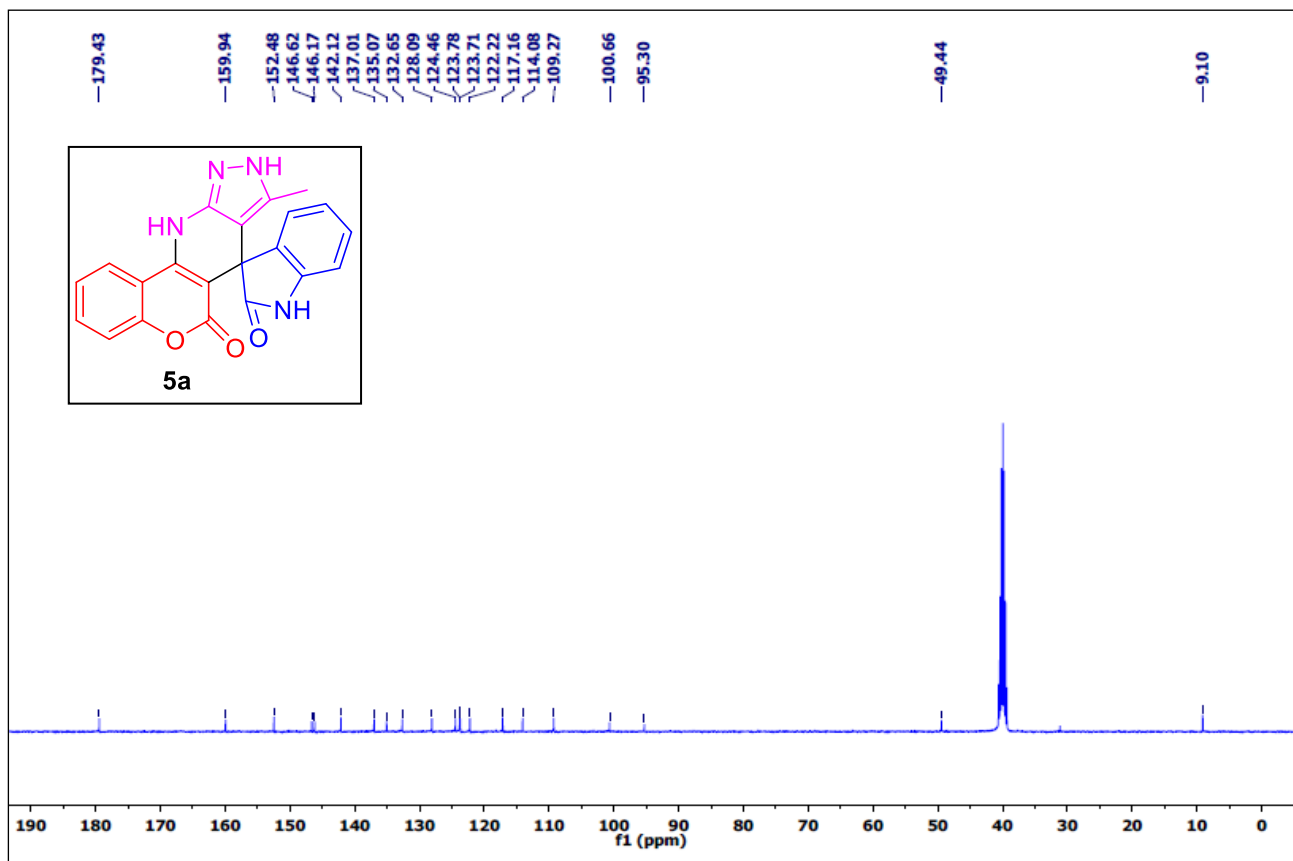

Copies of  $^1\text{H}$  and  $^{13}\text{C}$  spectrum of compound **5b**

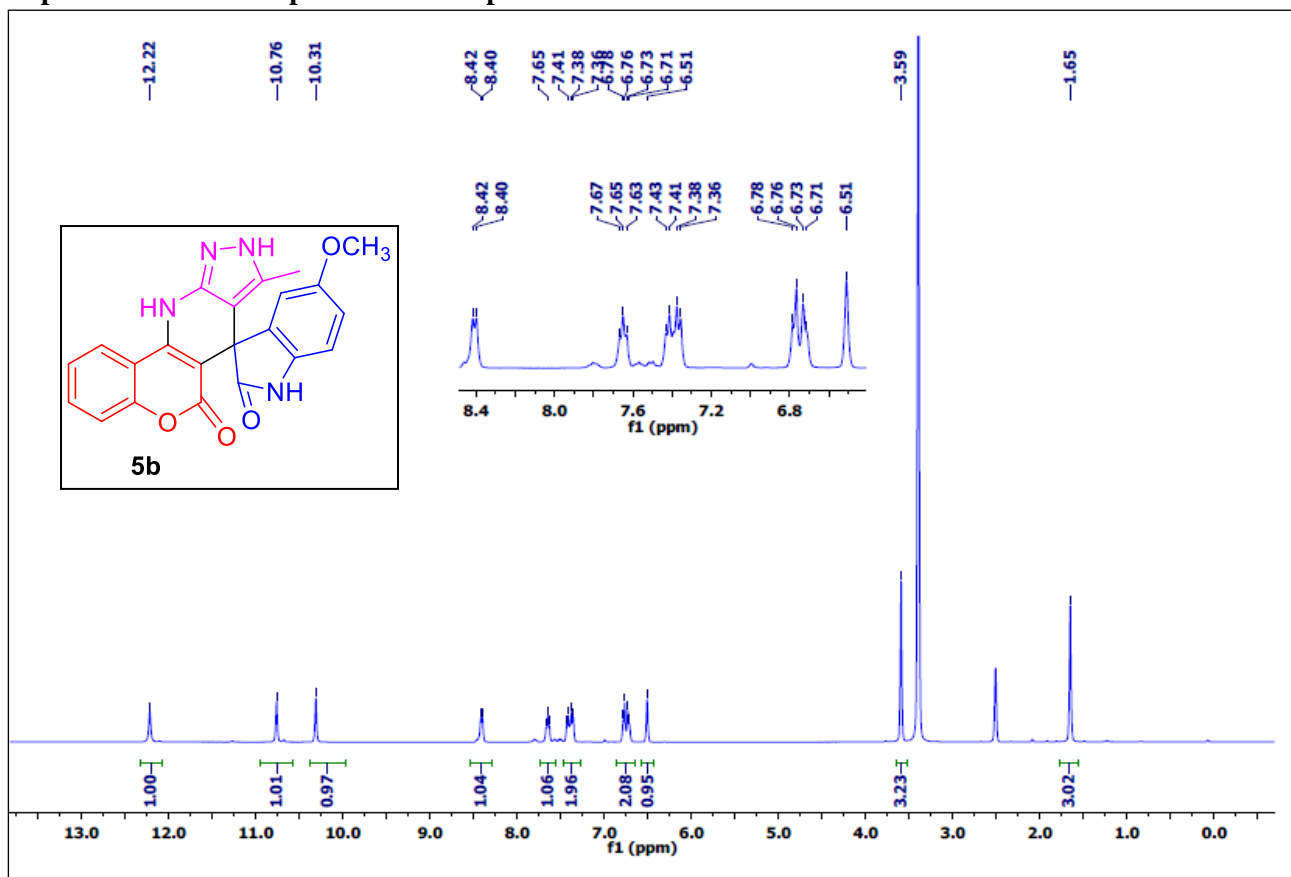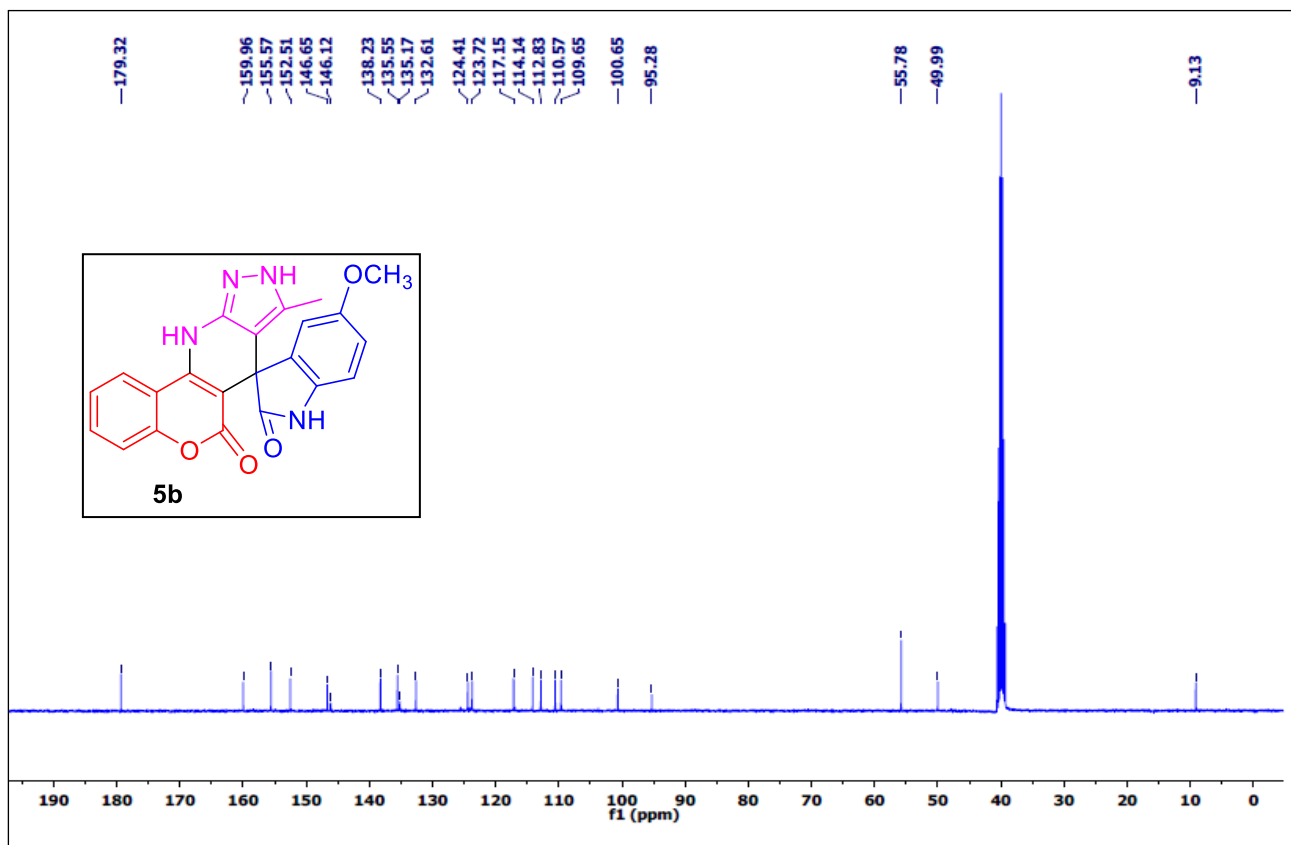

Copies of  $^1\text{H}$  and  $^{13}\text{C}$  spectrum of compound 5c

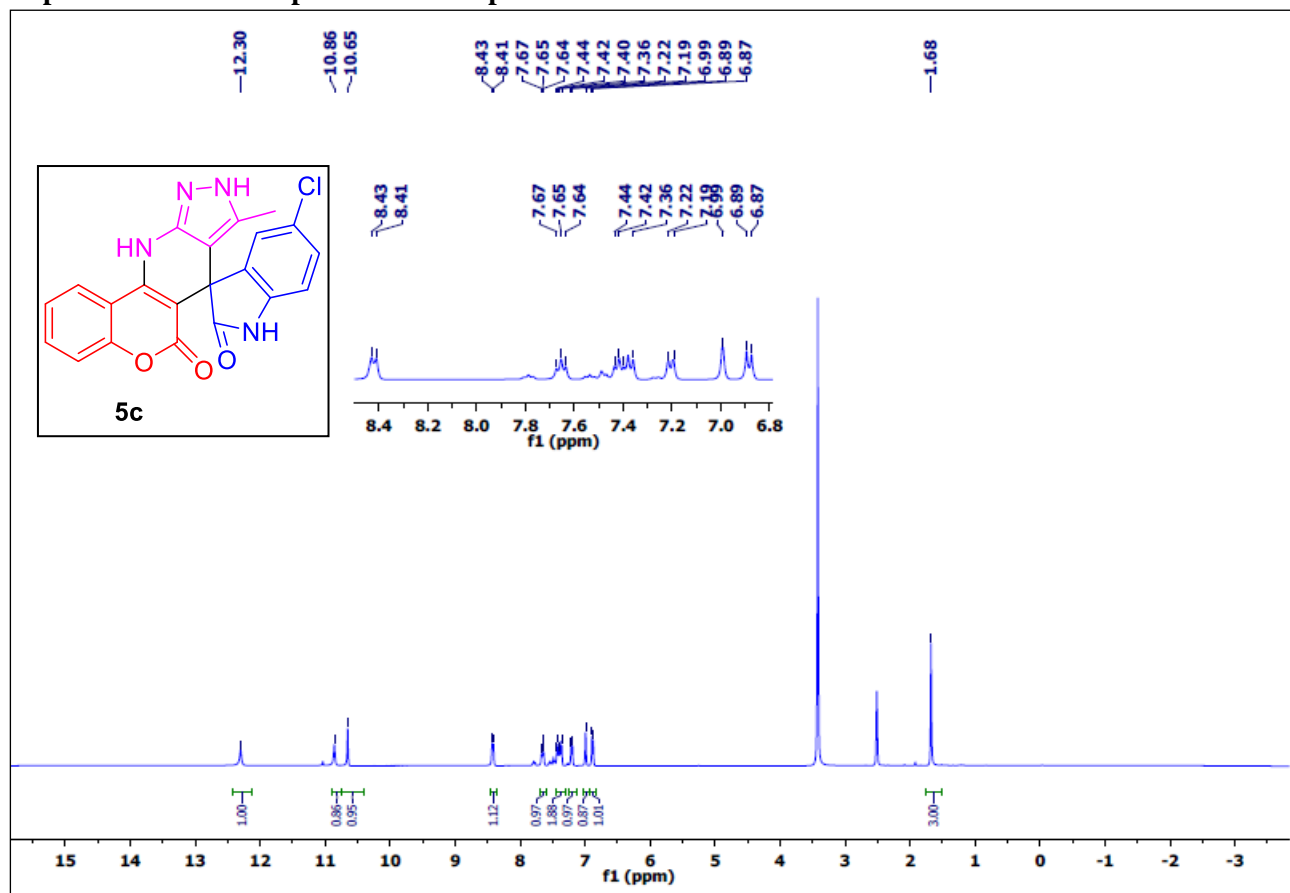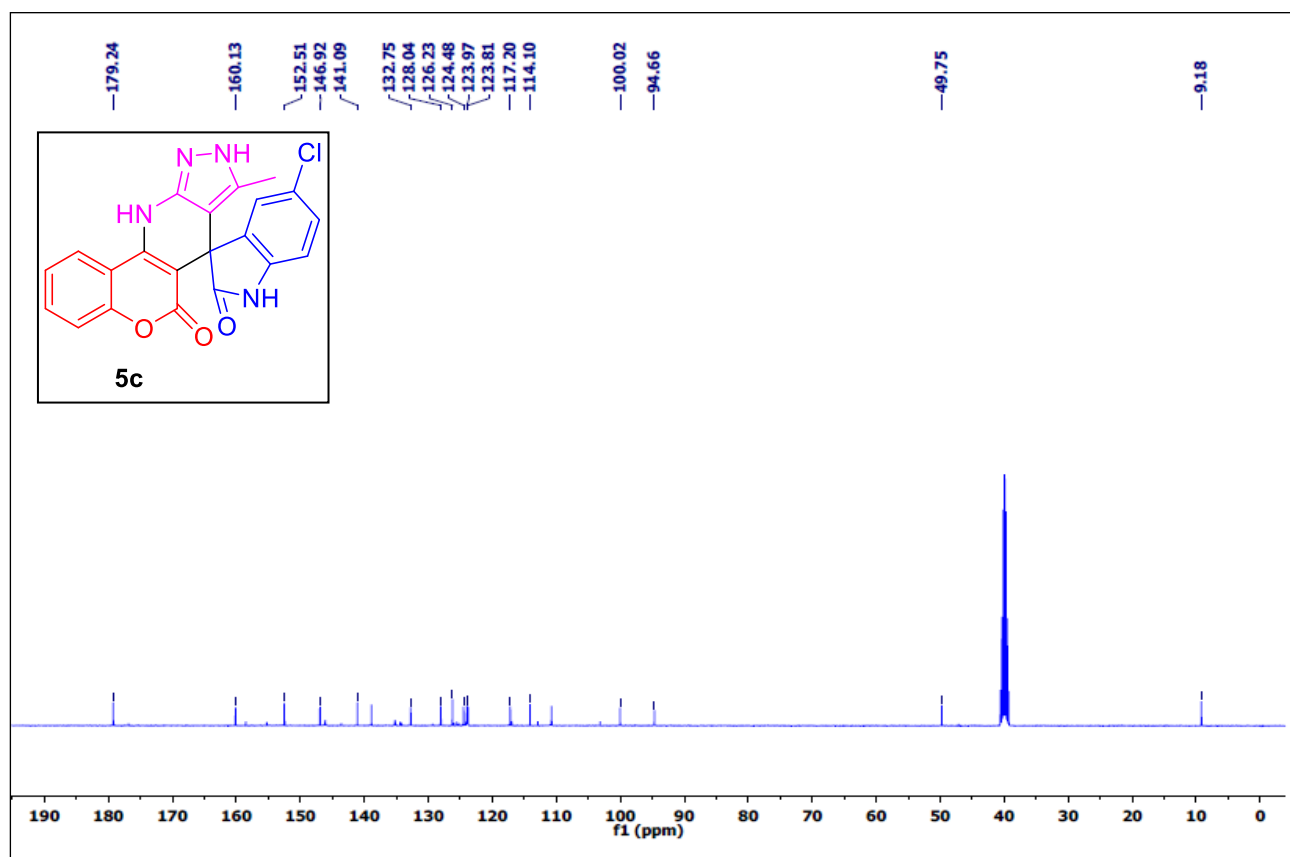

Copies of  $^1\text{H}$  and  $^{13}\text{C}$  spectrum of compound 5d

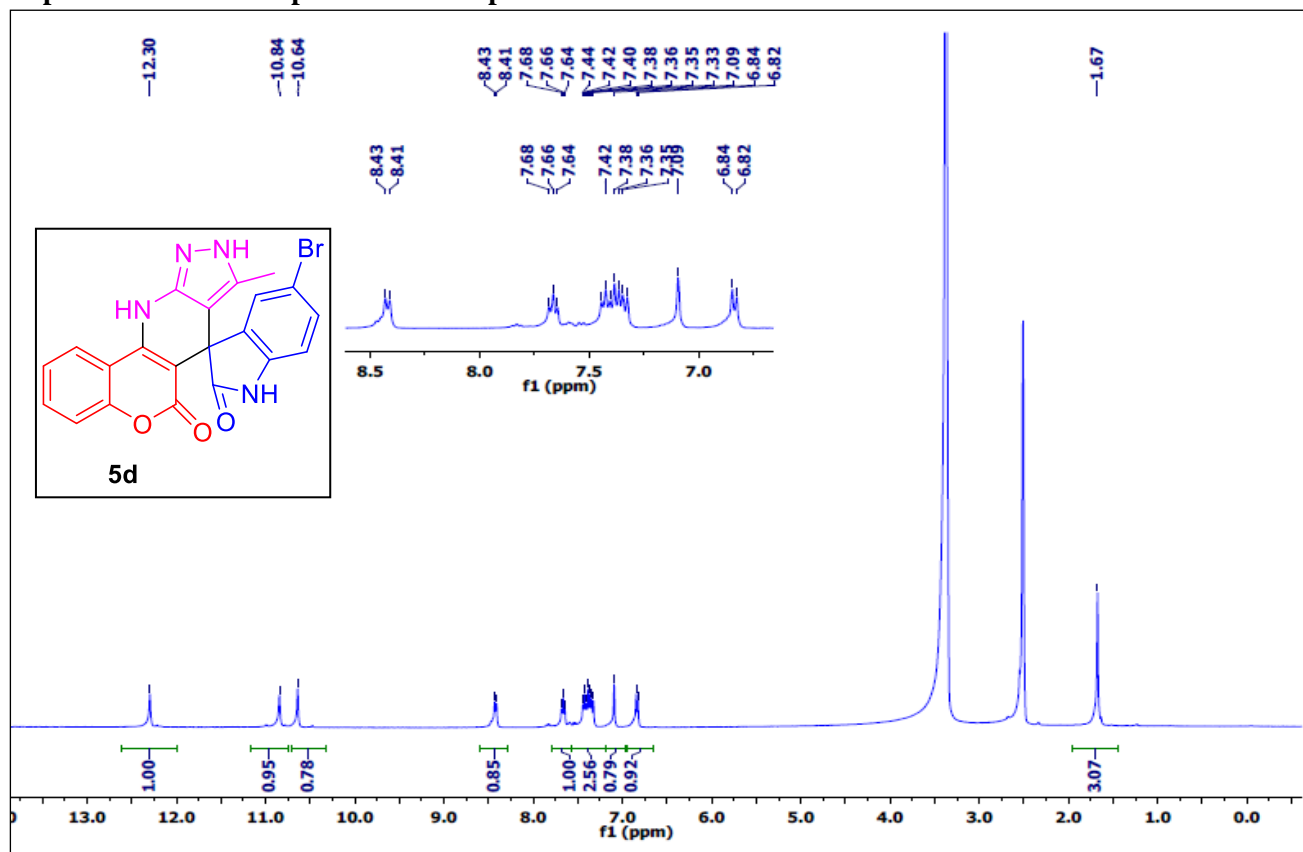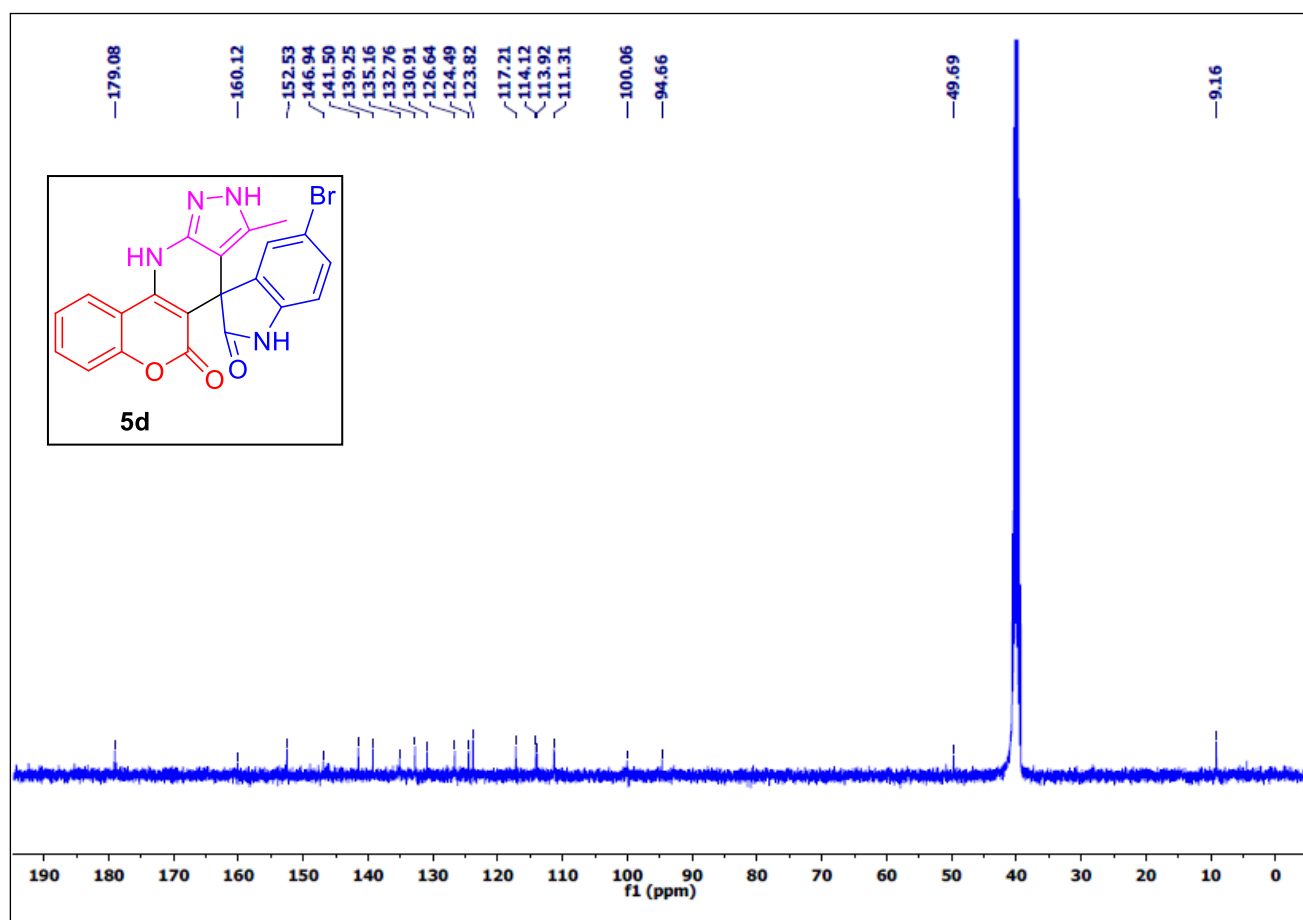

Copies of  $^1\text{H}$  and  $^{13}\text{C}$  spectrum of compound 5e

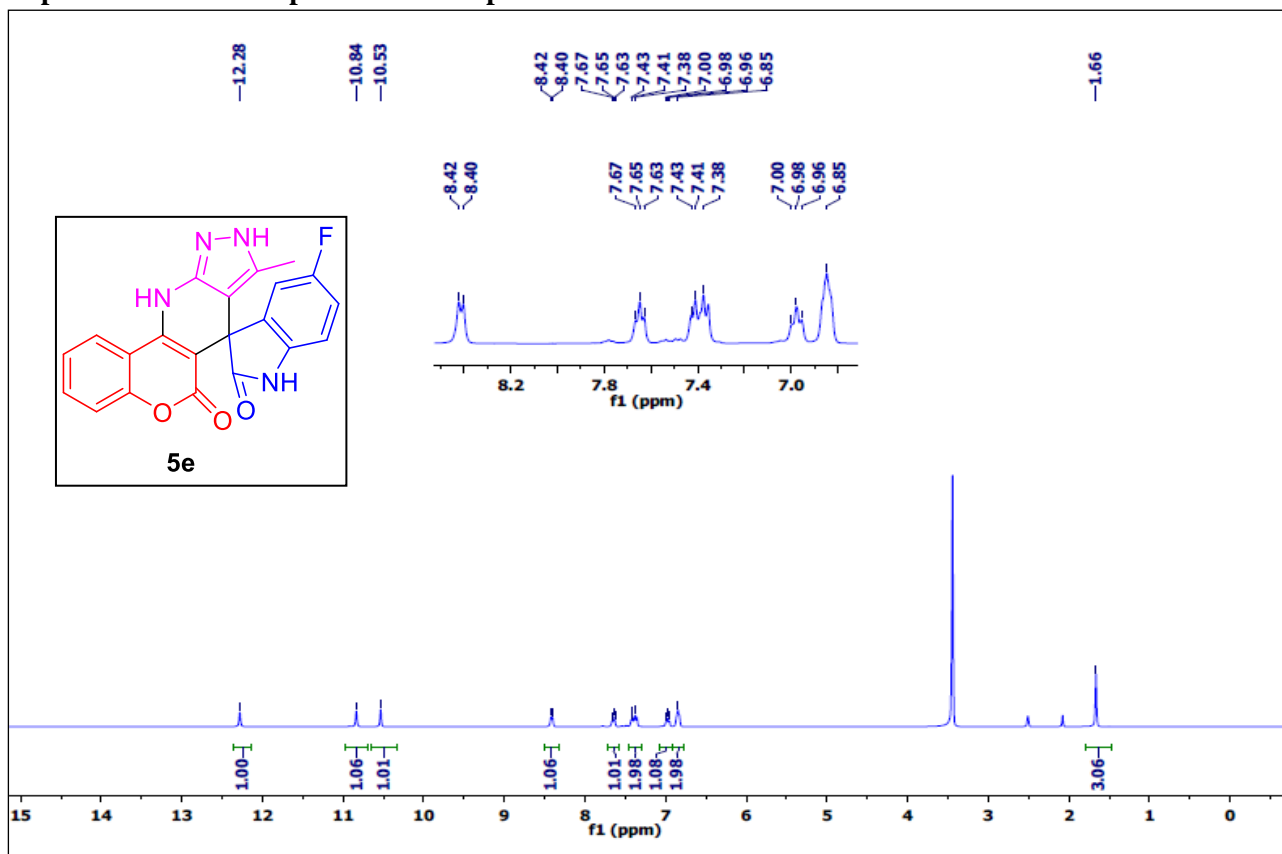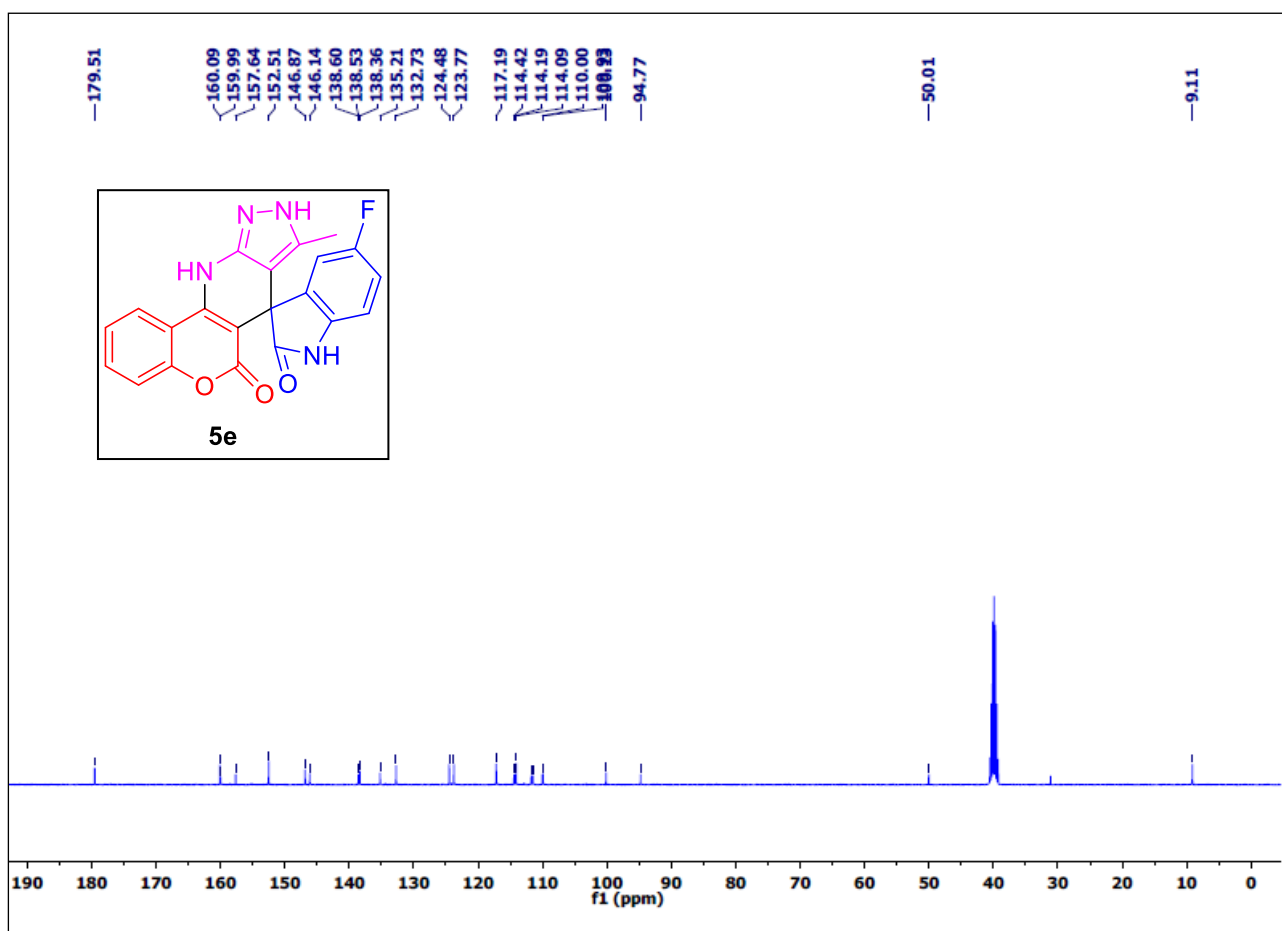



Copies of  $^1\text{H}$  and  $^{13}\text{C}$  spectrum of compound **5f**

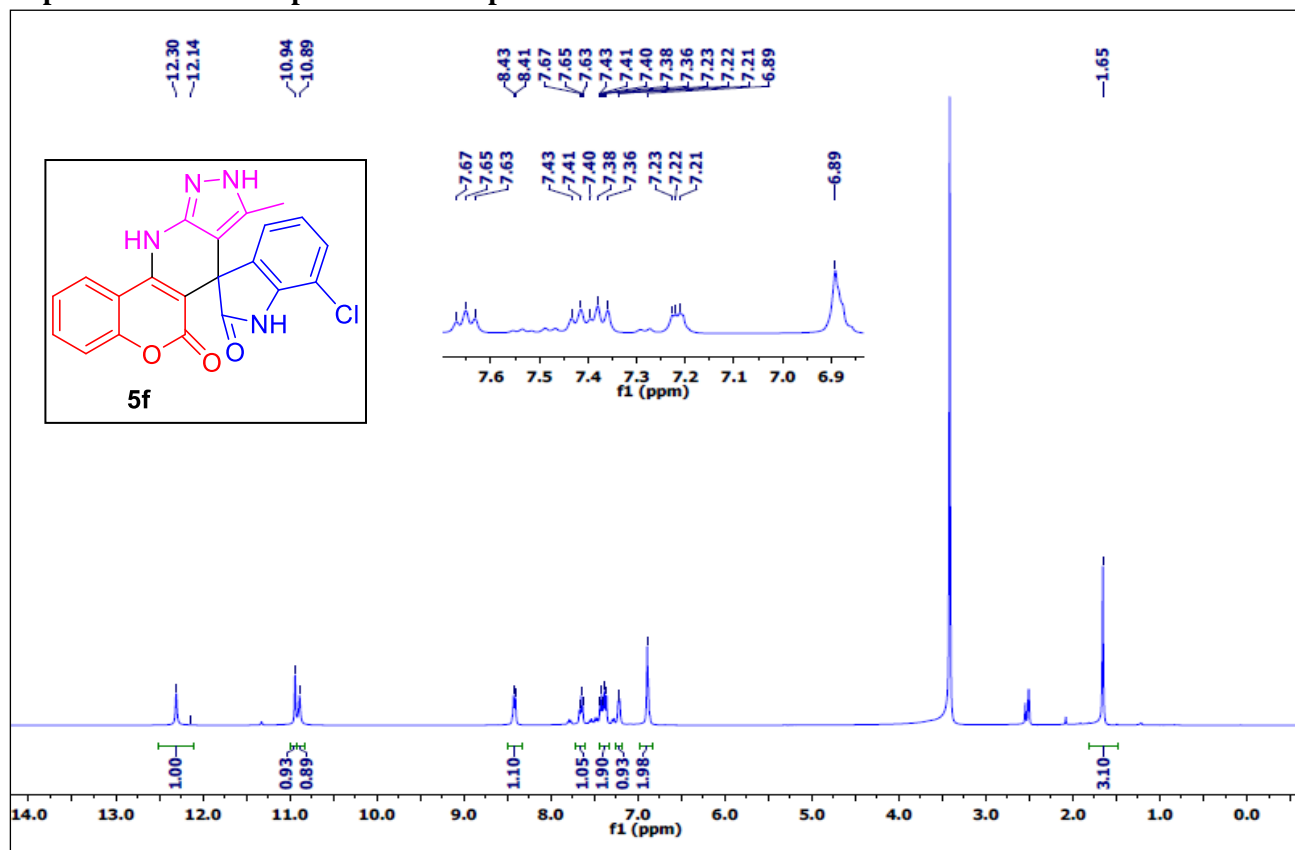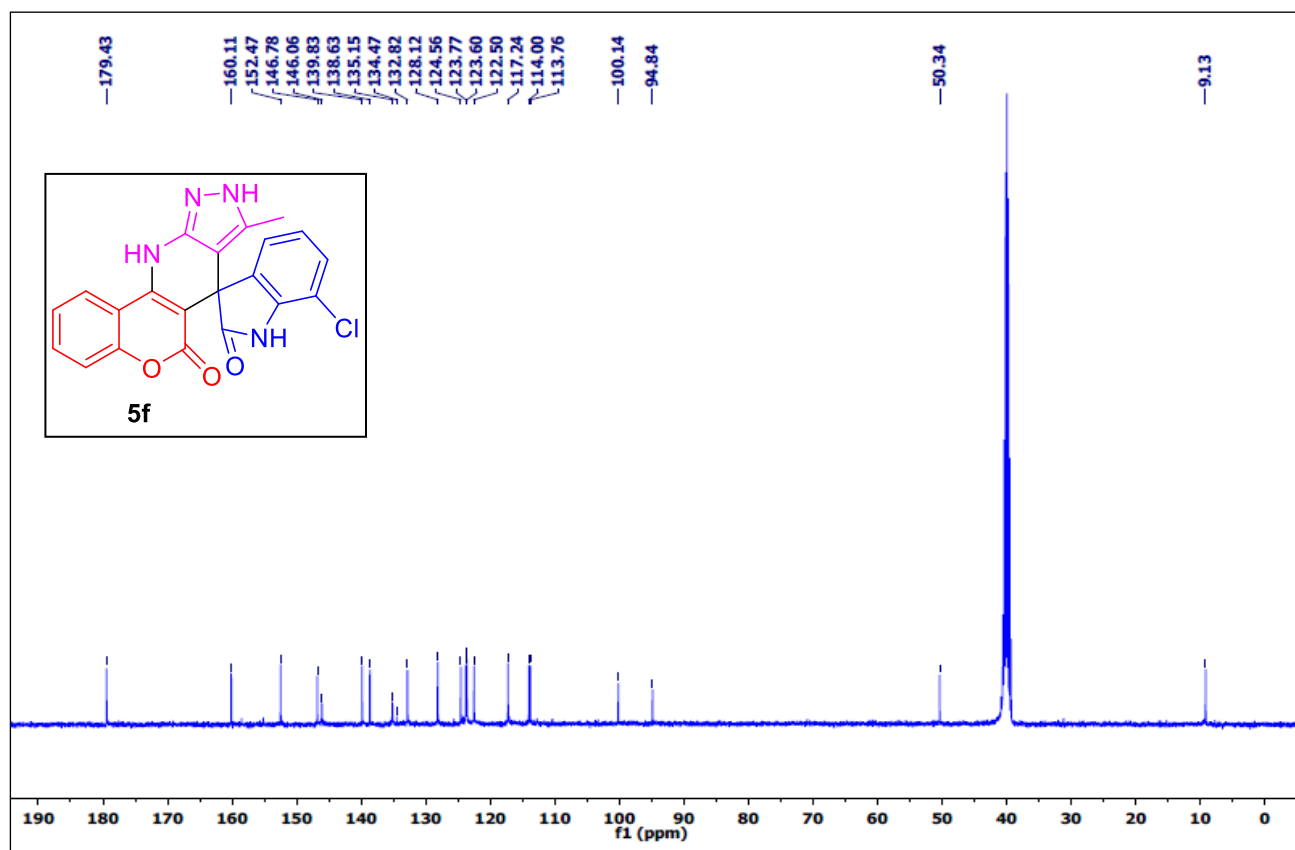

Copies of  $^1\text{H}$  and  $^{13}\text{C}$  spectrum of compound **5g**

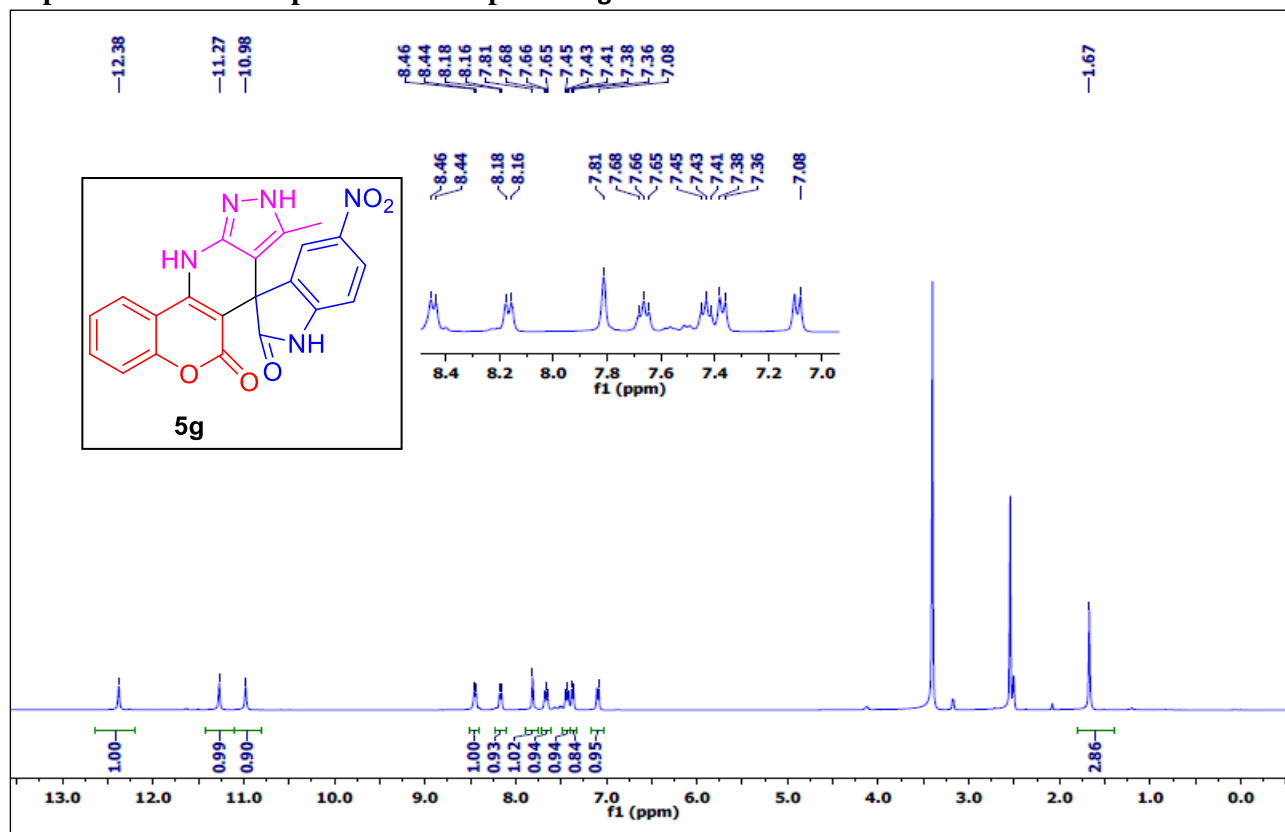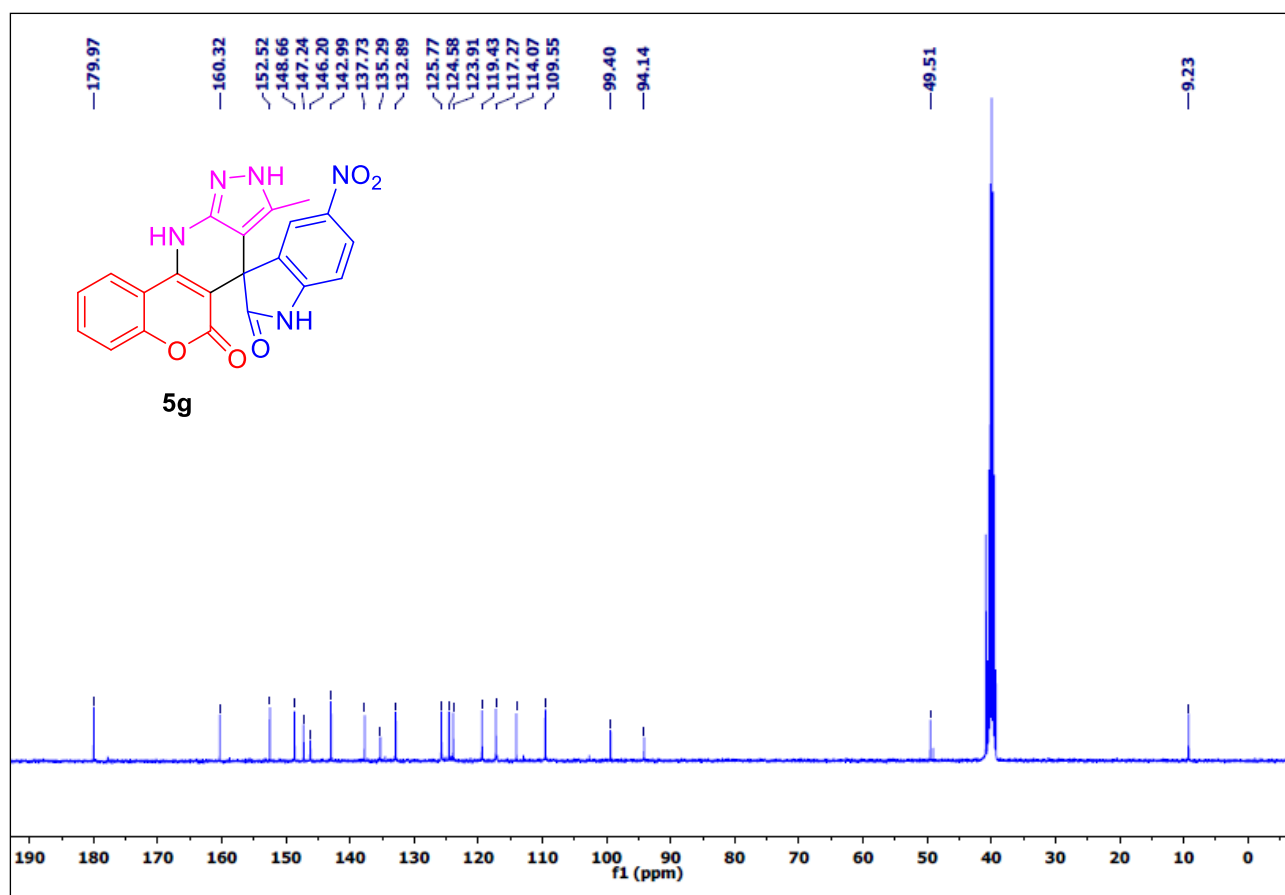

Copies of  $^1\text{H}$  and  $^{13}\text{C}$  spectrum of compound 5h

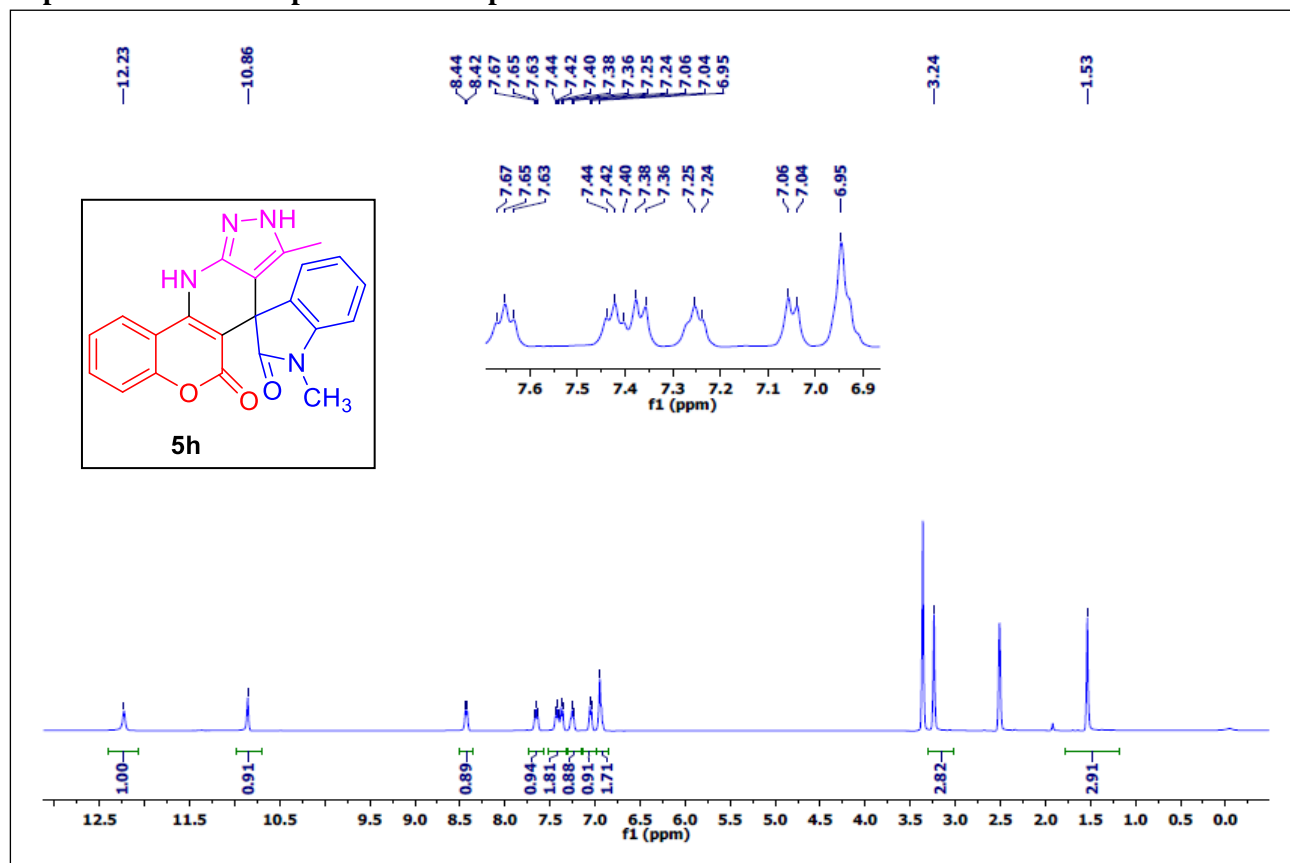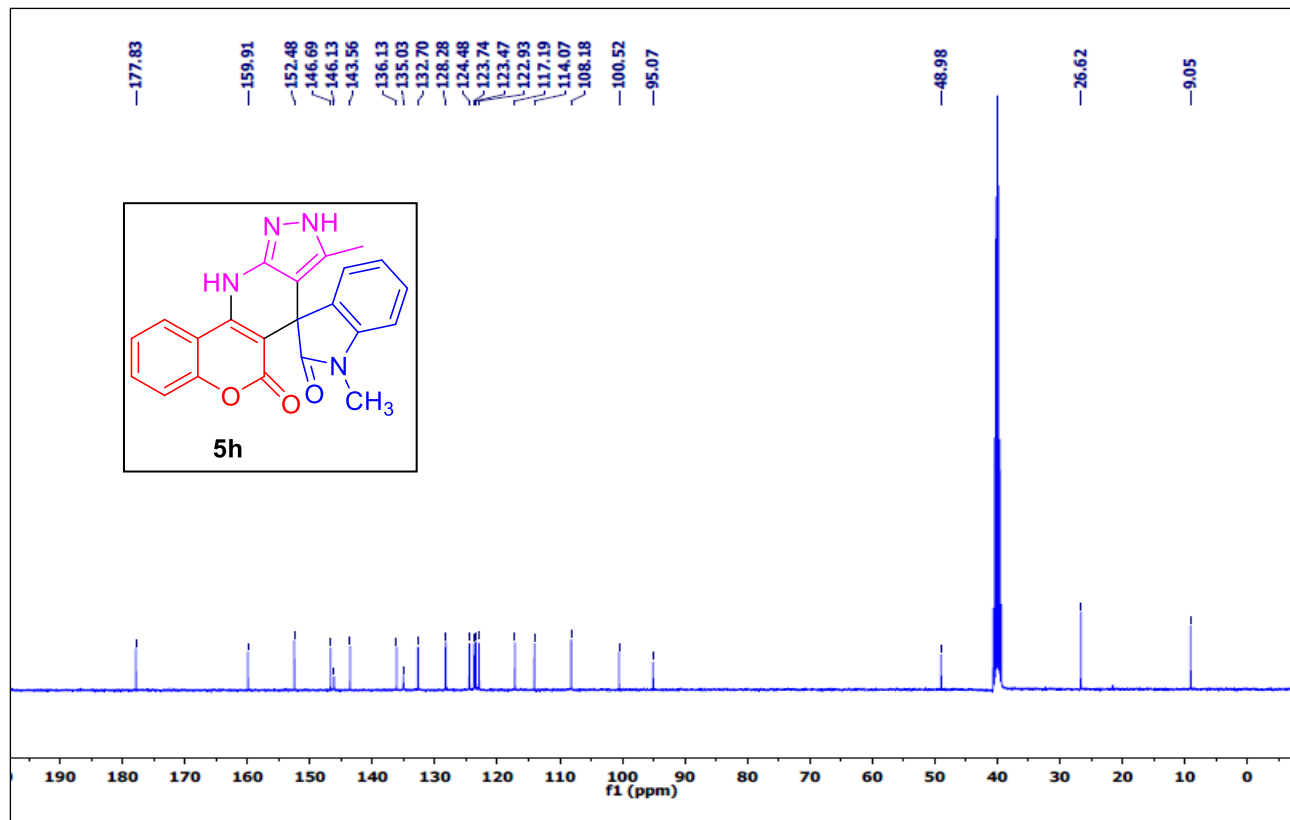

Copies of  $^1\text{H}$  and  $^{13}\text{C}$  spectrum of compound 5i

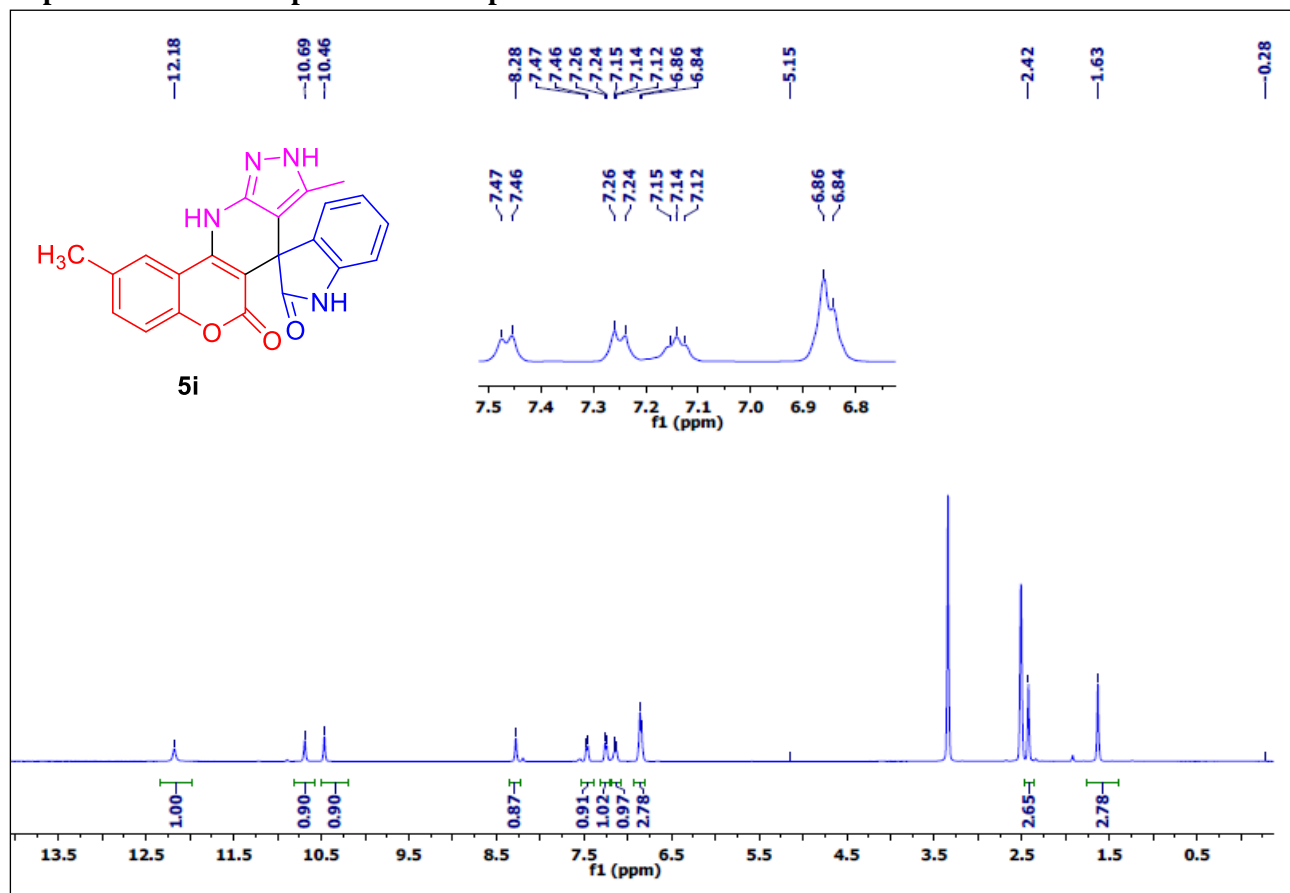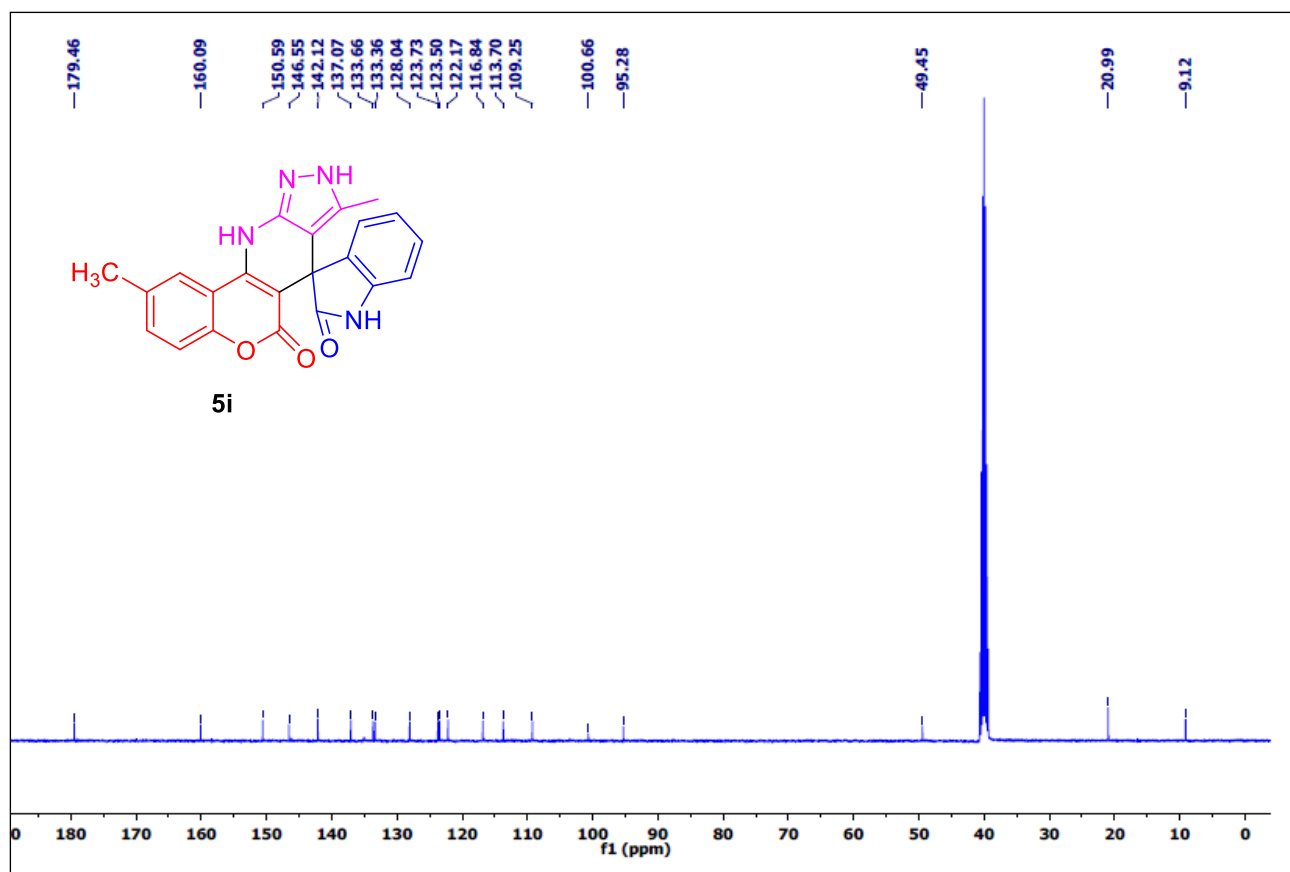

Copies of  $^1\text{H}$  and  $^{13}\text{C}$  spectrum of compound **5j**

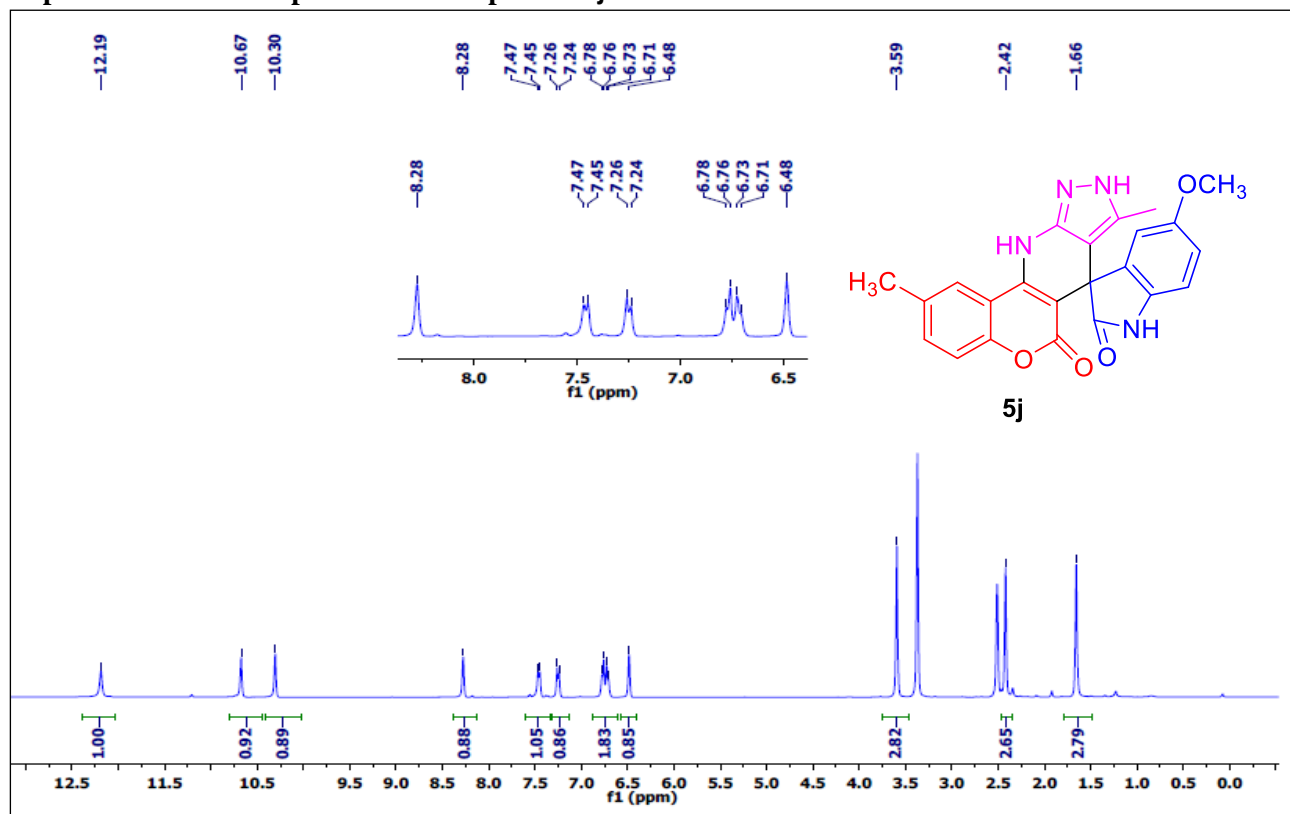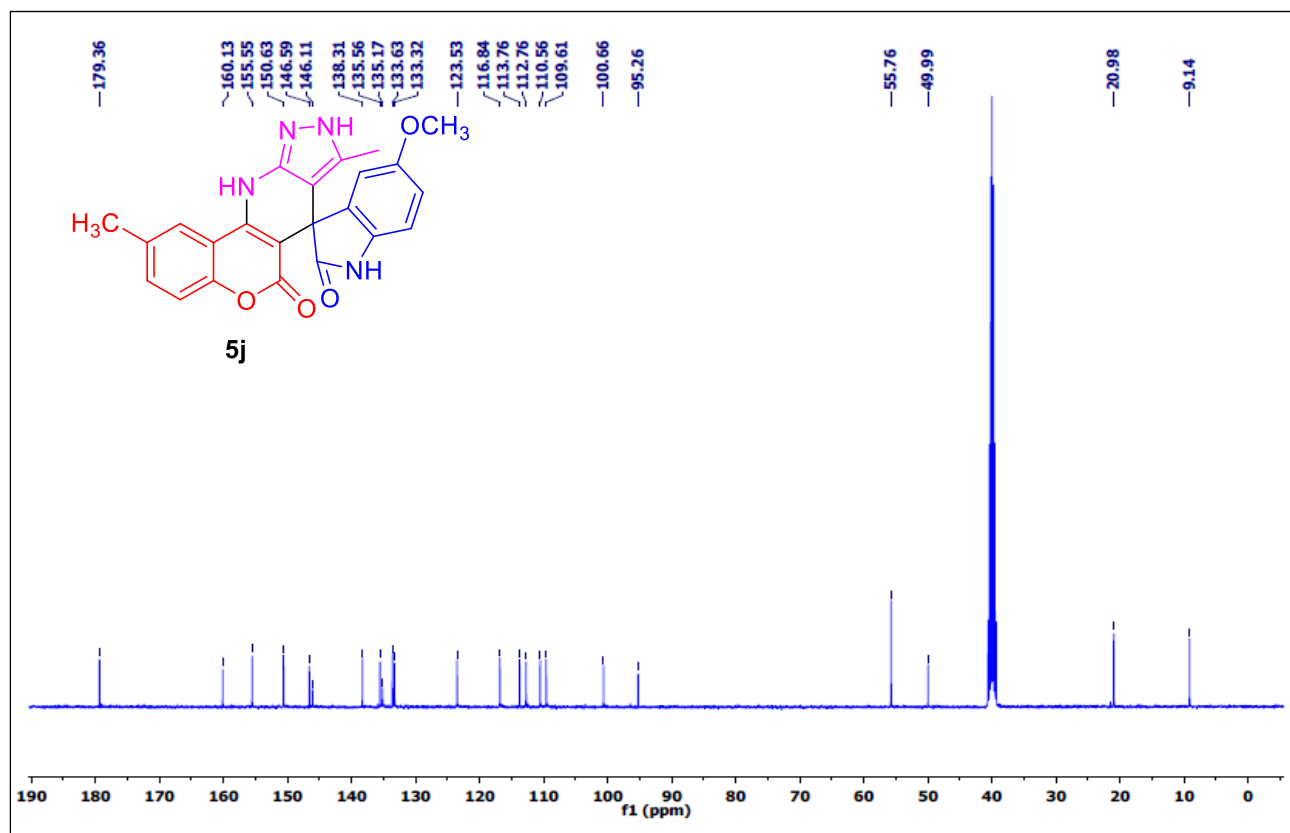

Copies of  $^1\text{H}$  and  $^{13}\text{C}$  spectrum of compound 5k

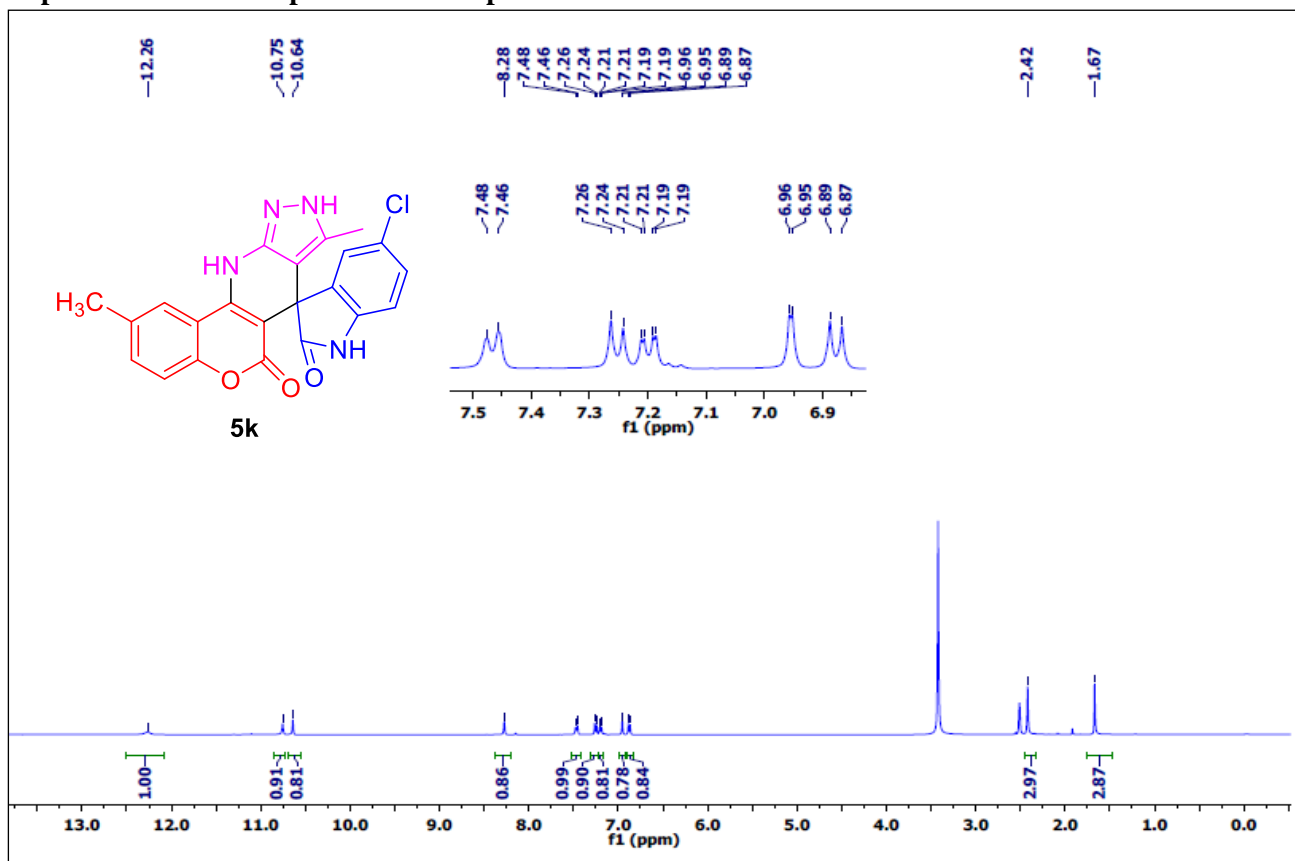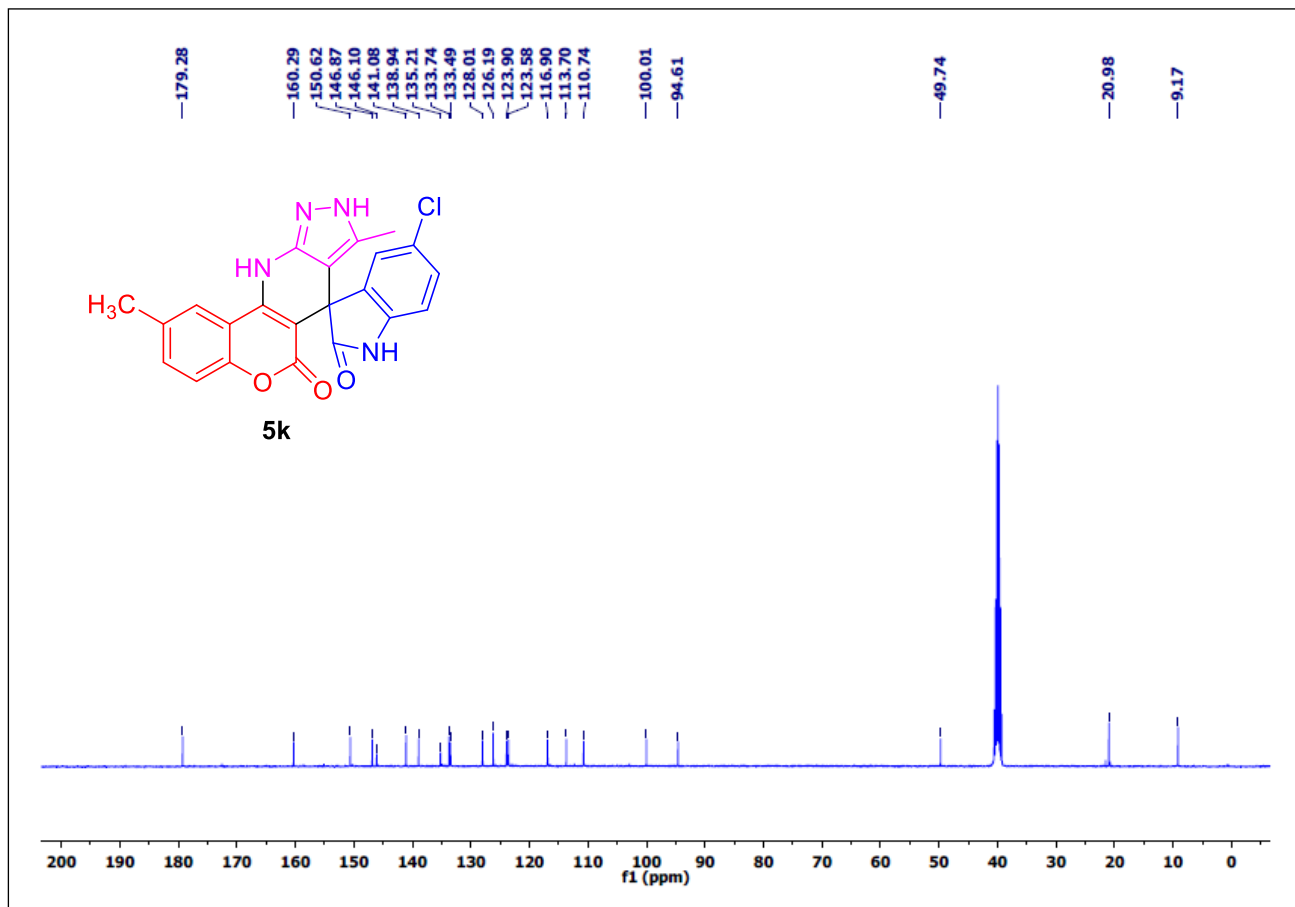

Copies of  $^1\text{H}$  and  $^{13}\text{C}$  spectrum of compound 5l

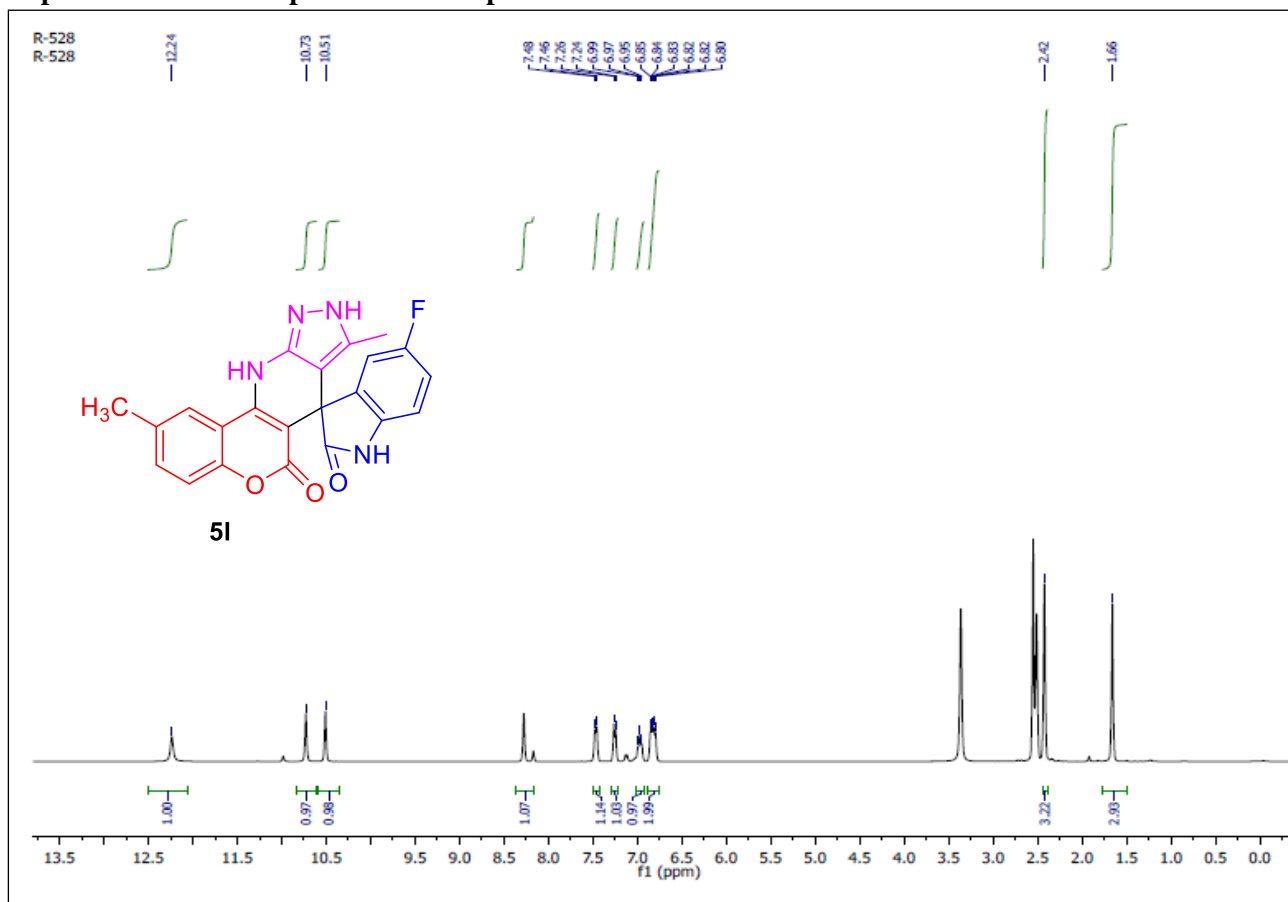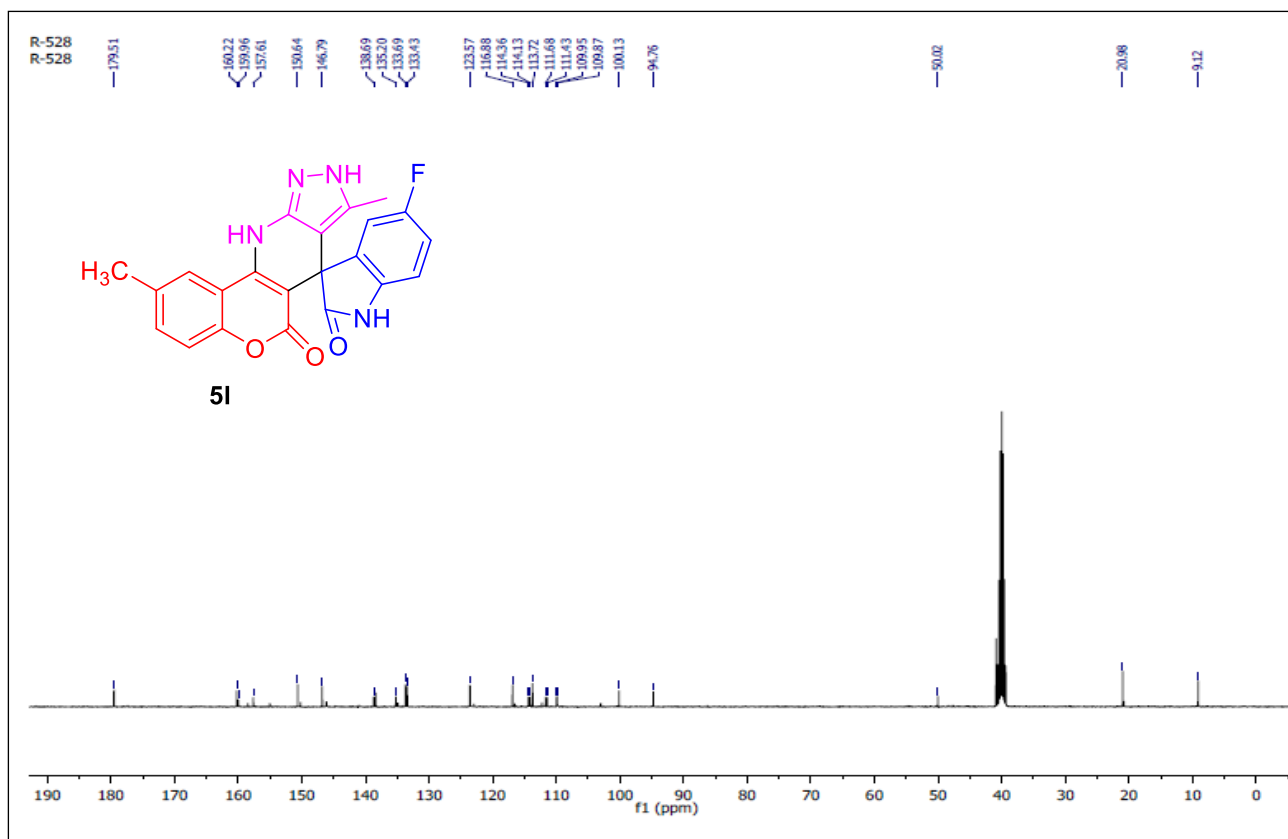

Copies of  $^1\text{H}$  and  $^{13}\text{C}$  spectrum of compound 5m

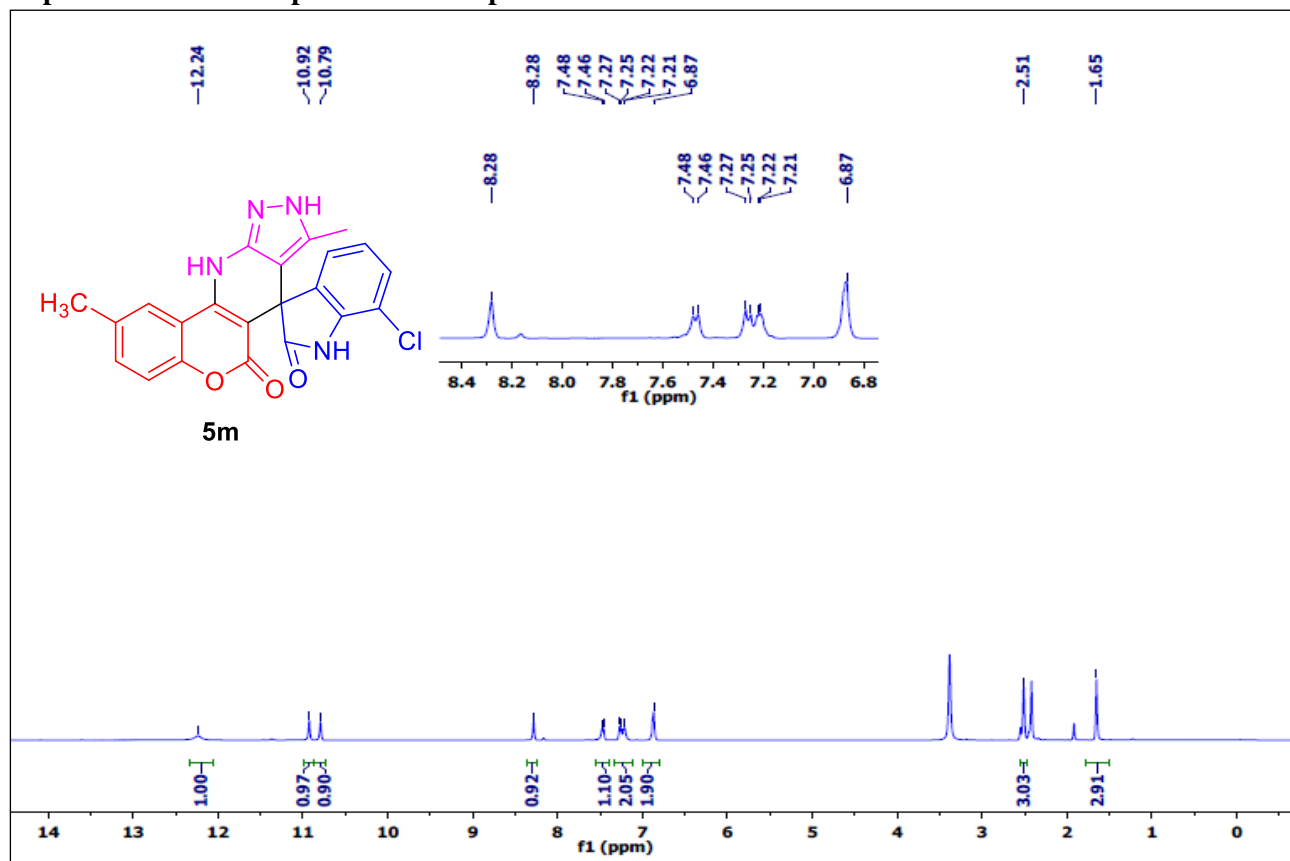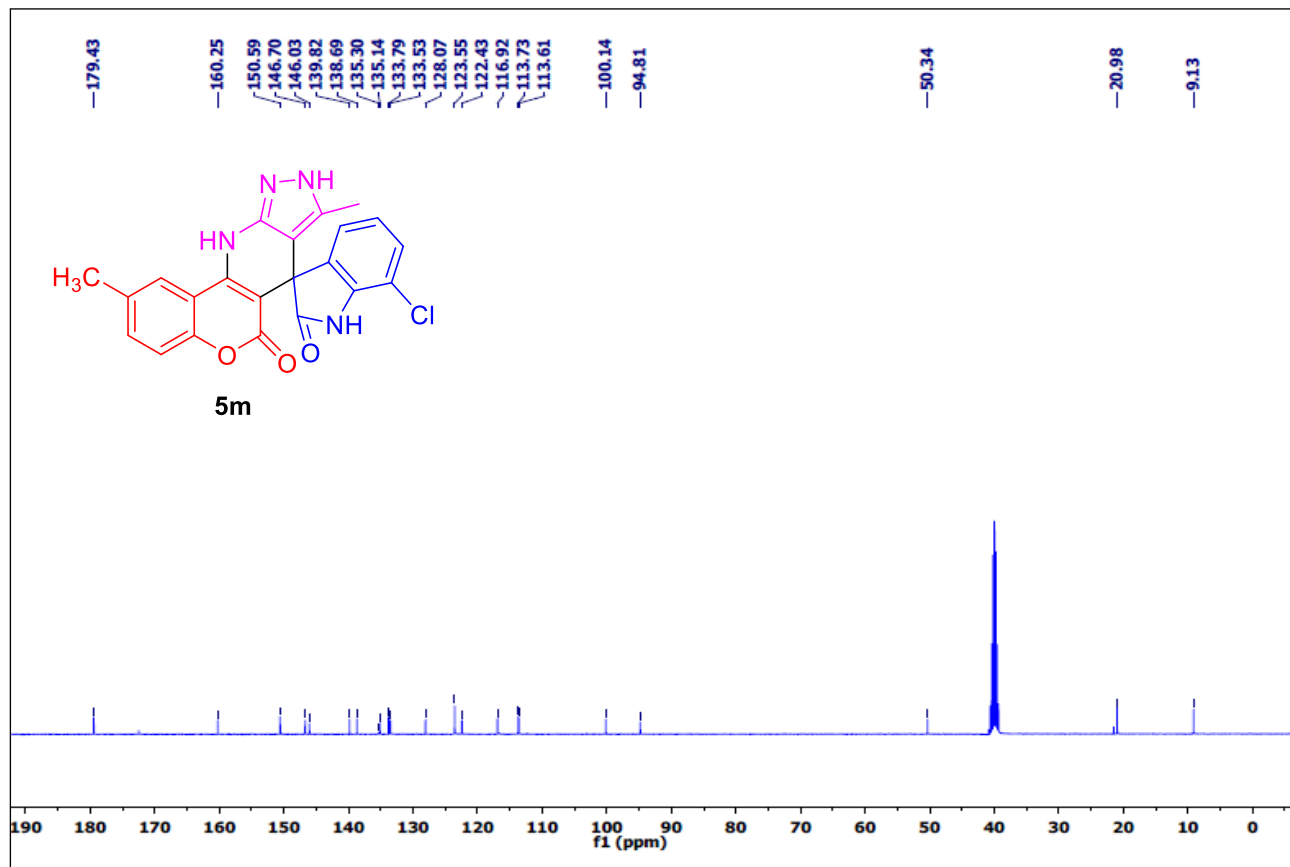



Copies of  $^1\text{H}$  and  $^{13}\text{C}$  spectrum of compound **5n**

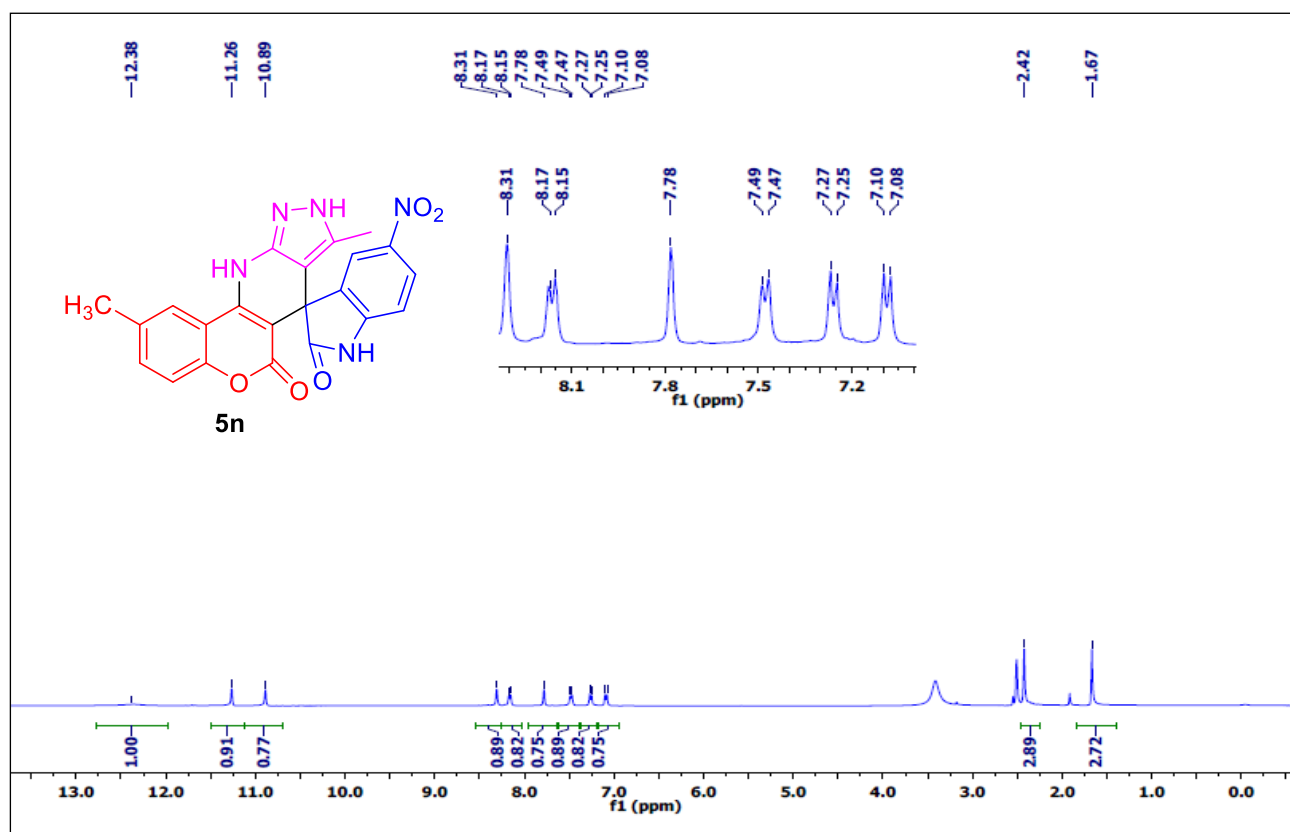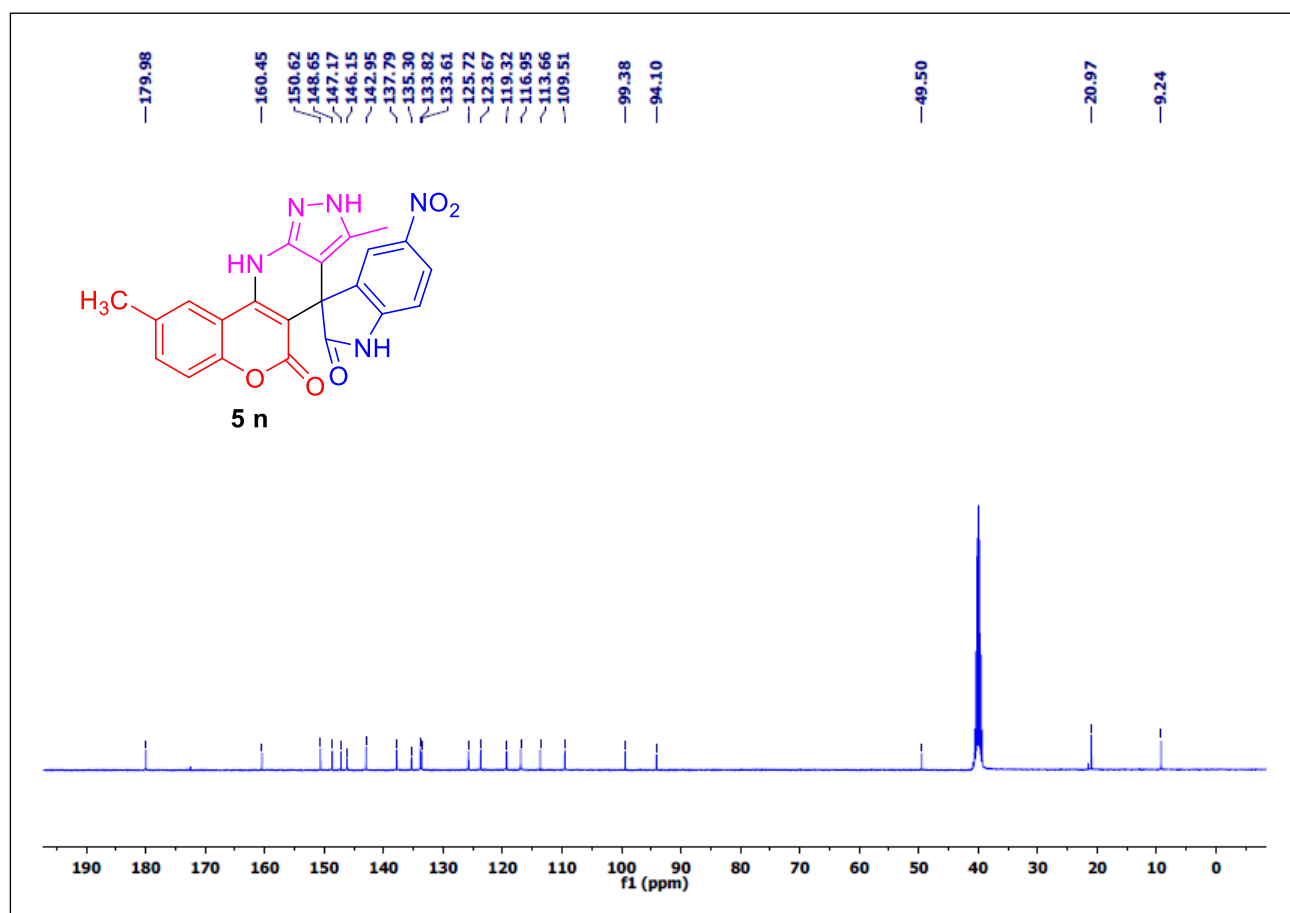

Copies of  $^1\text{H}$  and  $^{13}\text{C}$  spectrum of compound 5o

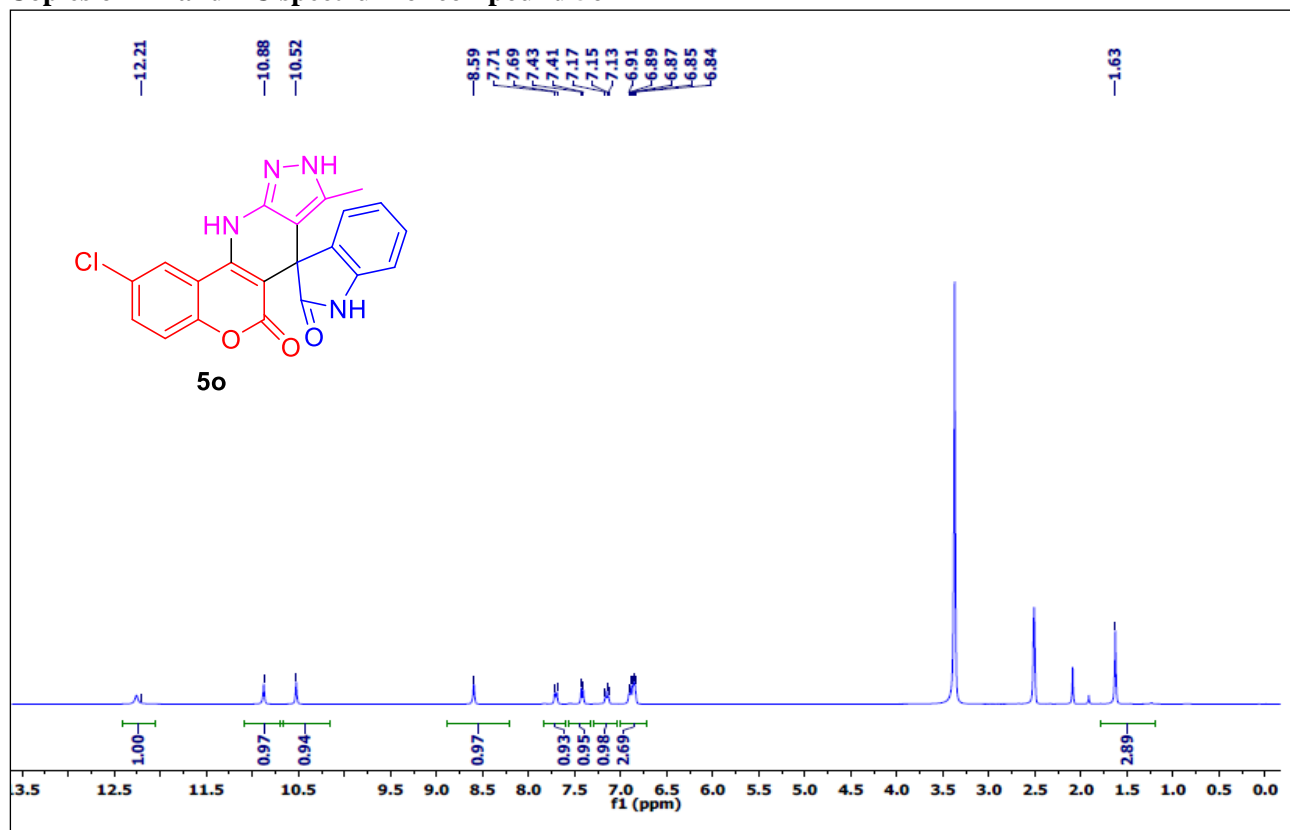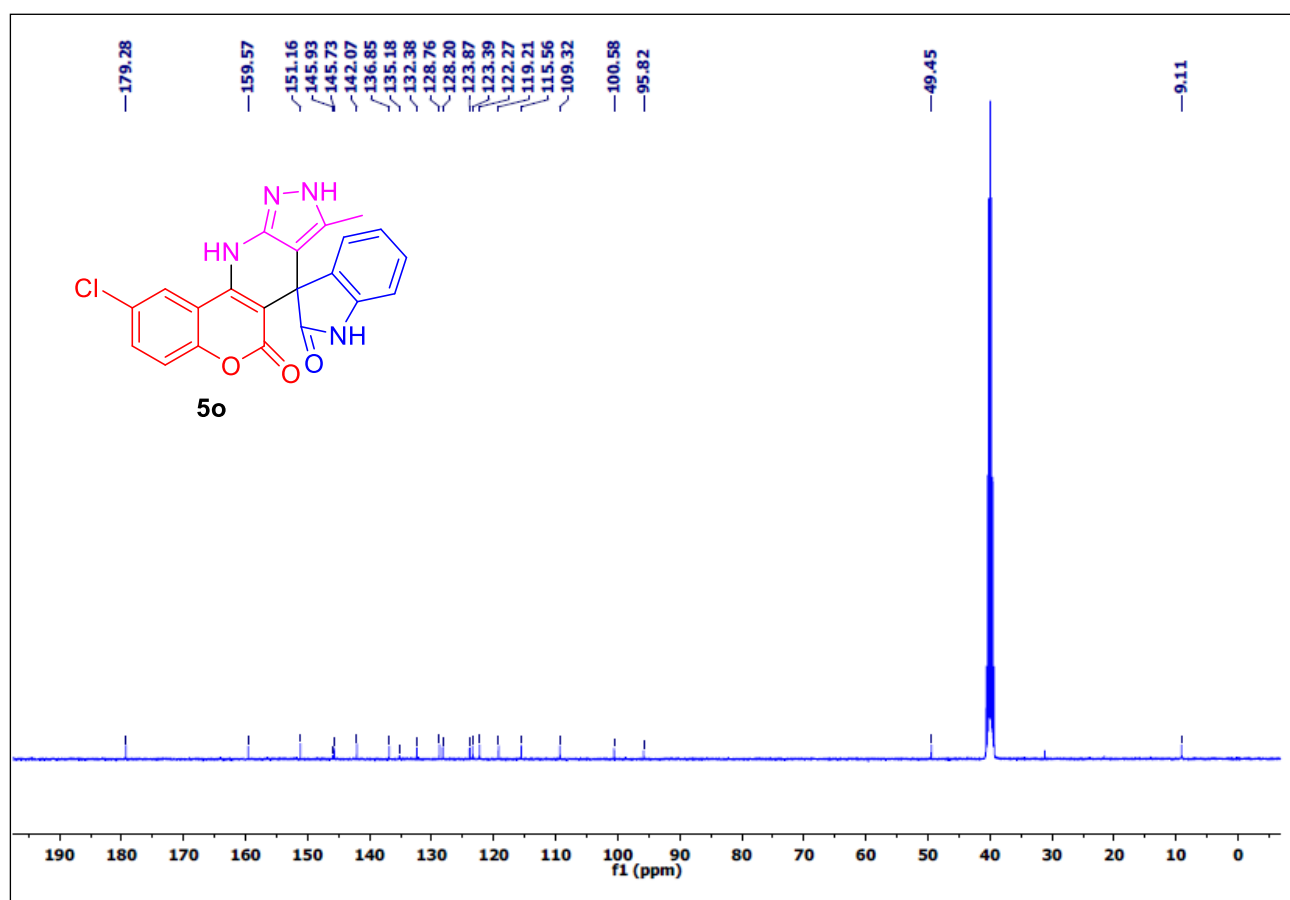

Copies of  $^1\text{H}$  and  $^{13}\text{C}$  spectrum of compound 5p

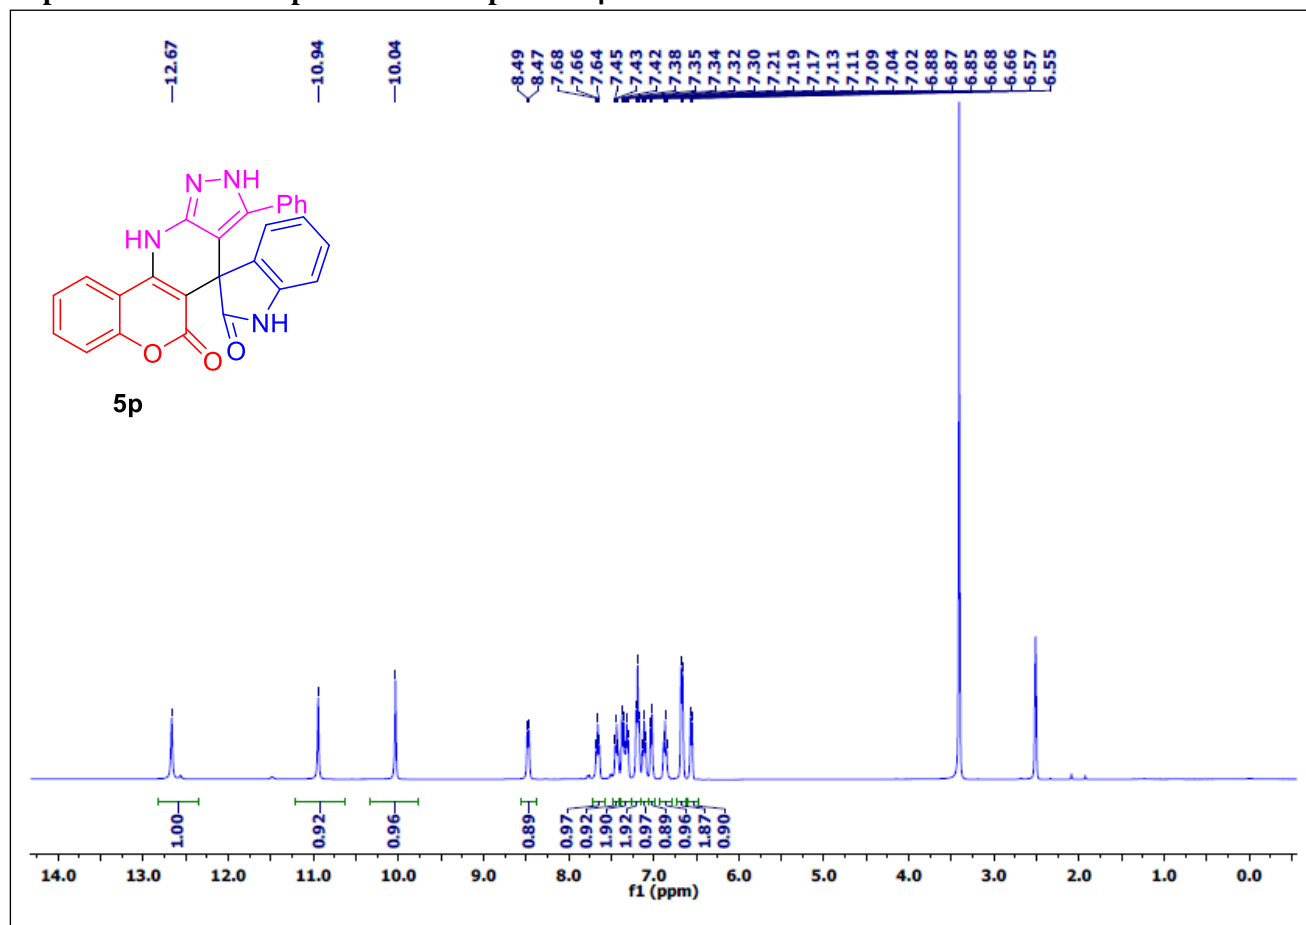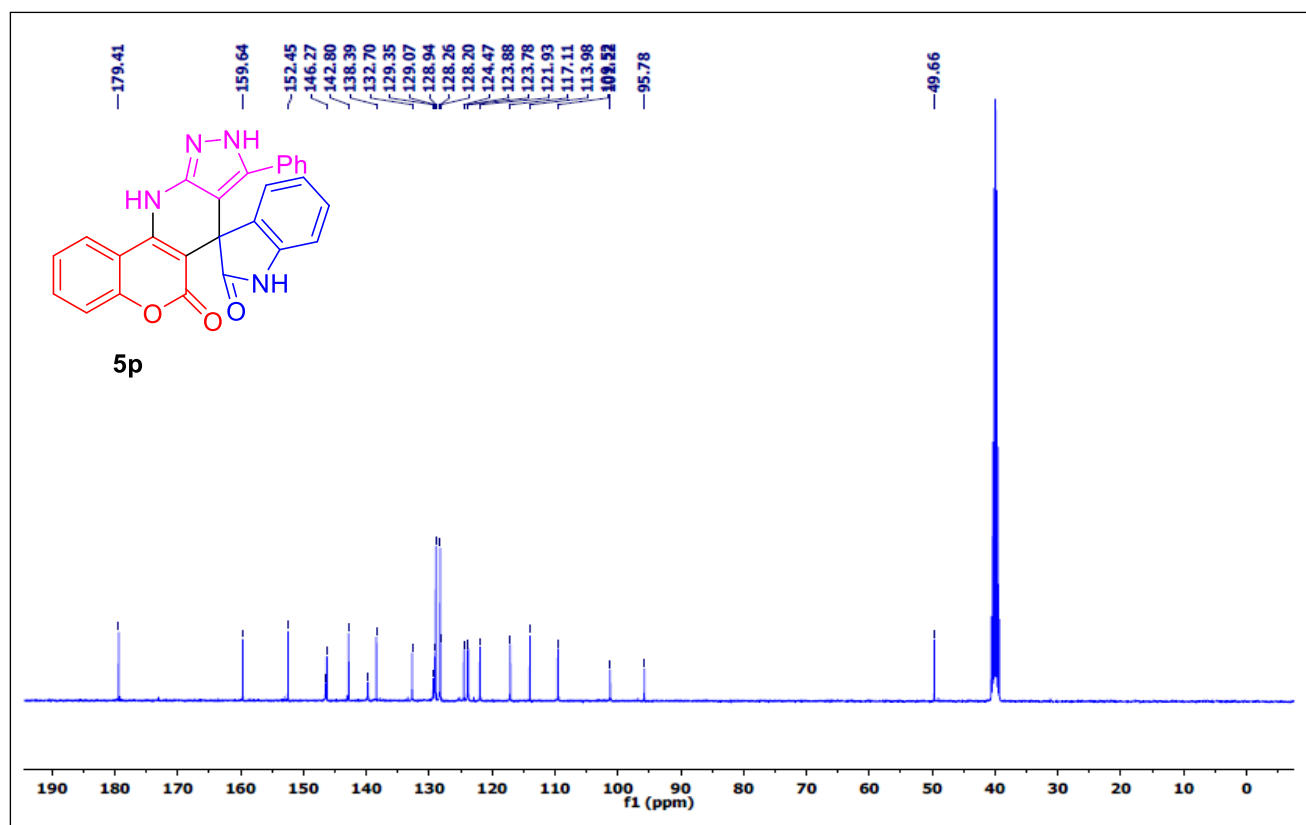

Copies of  $^1\text{H}$  and  $^{13}\text{C}$  spectrum of compound 5q

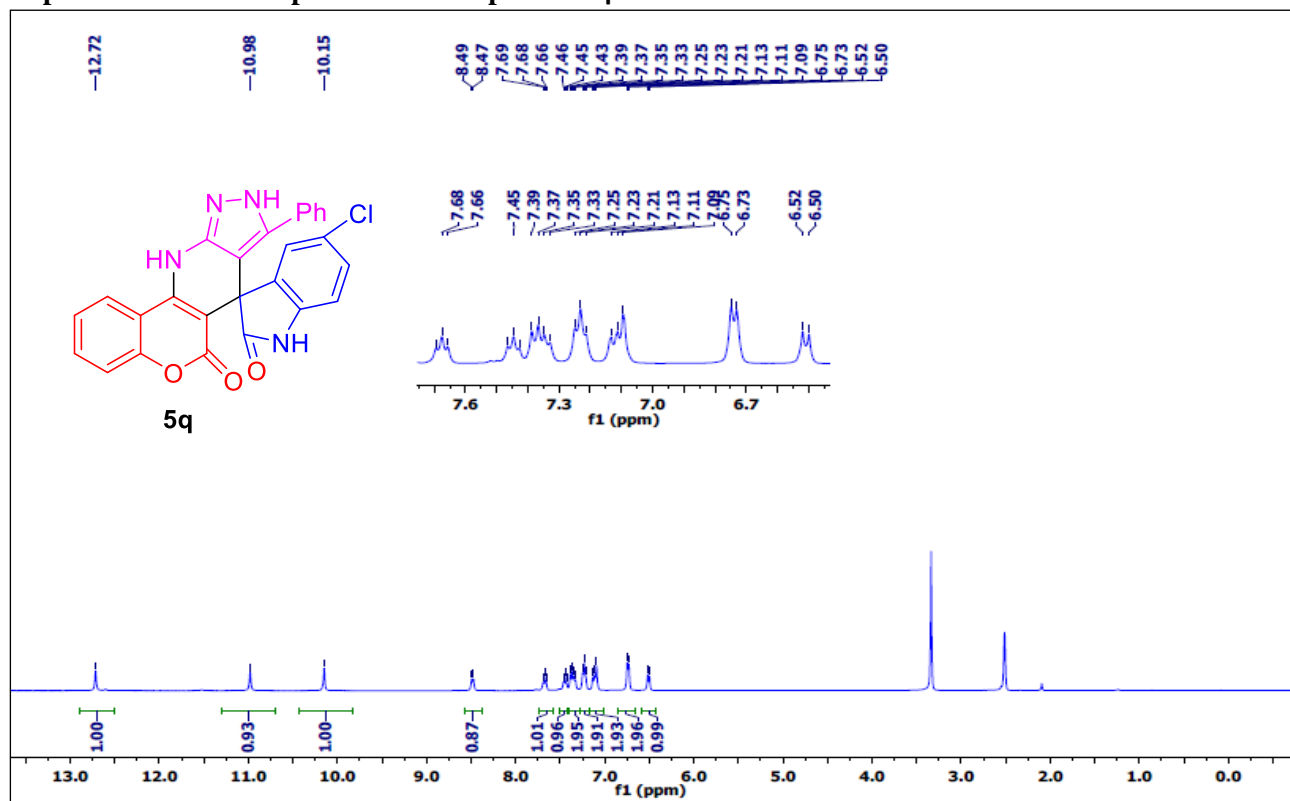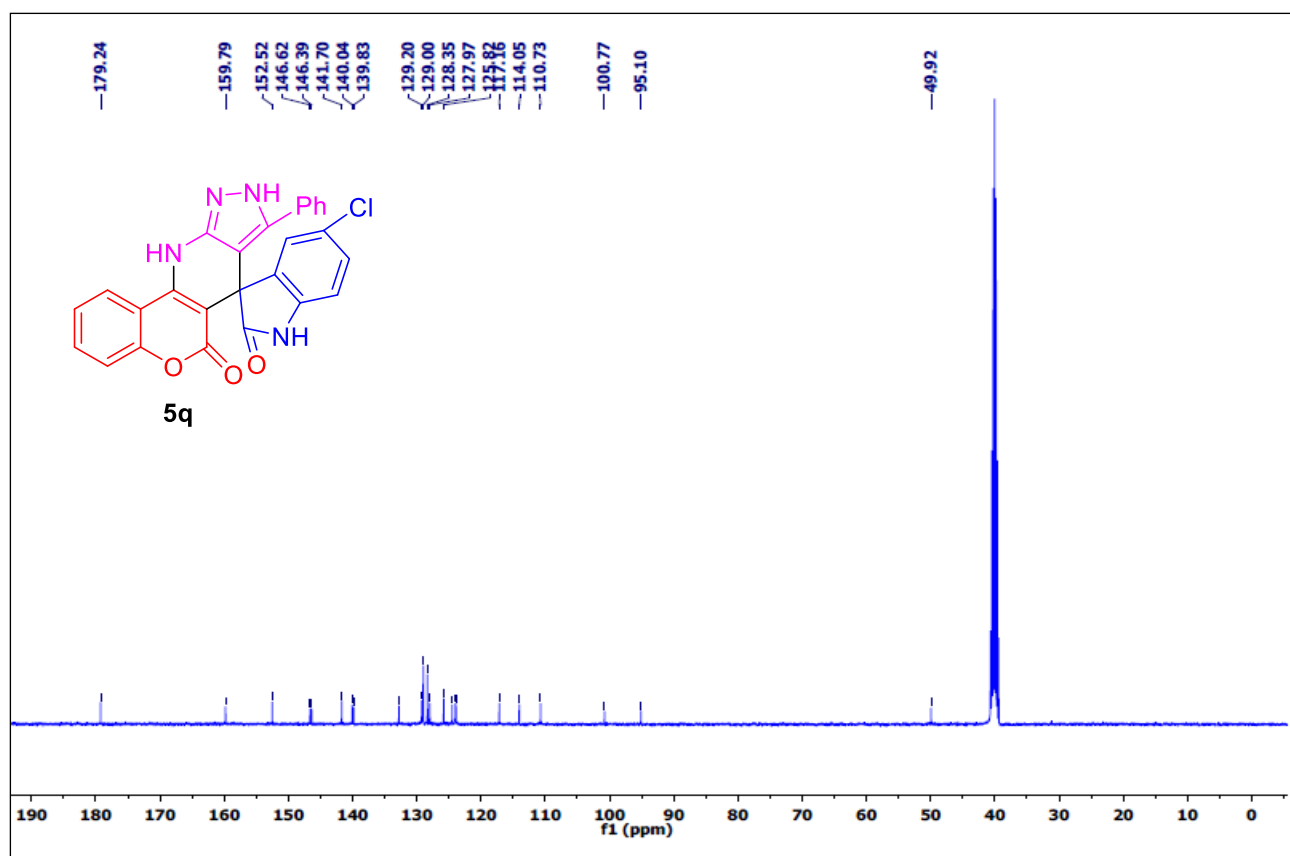

Copies of  $^1\text{H}$  and  $^{13}\text{C}$  spectrum of compound **5r**

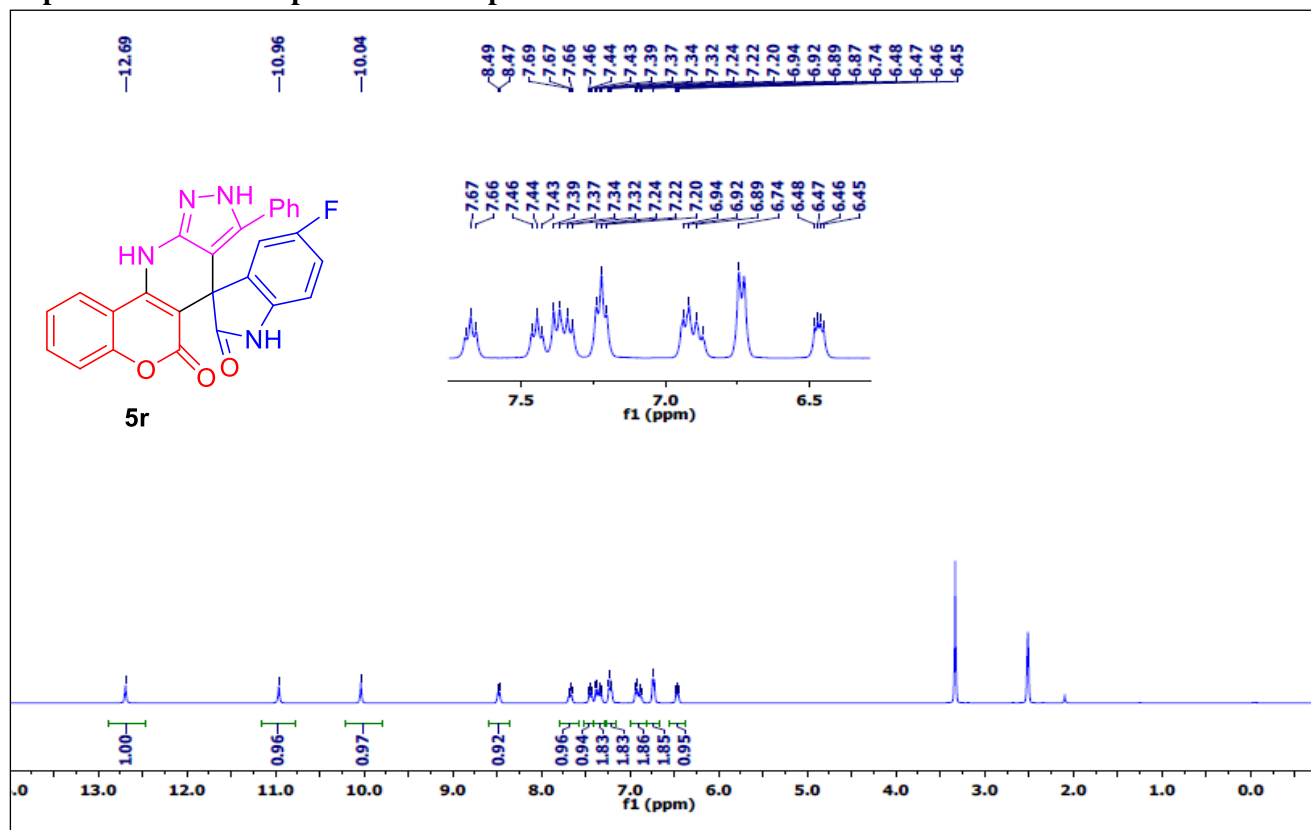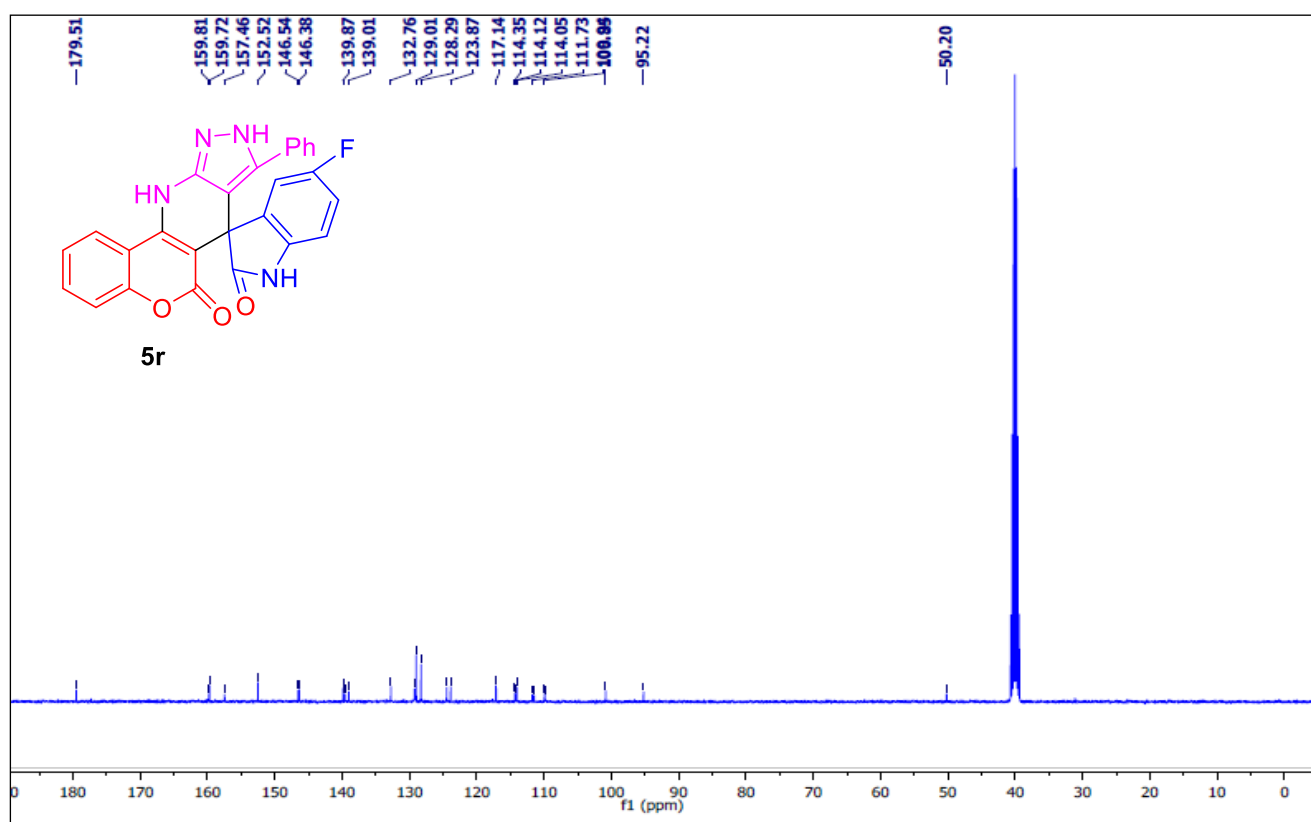

Copies of  $^1\text{H}$  and  $^{13}\text{C}$  spectrum of compound 5s

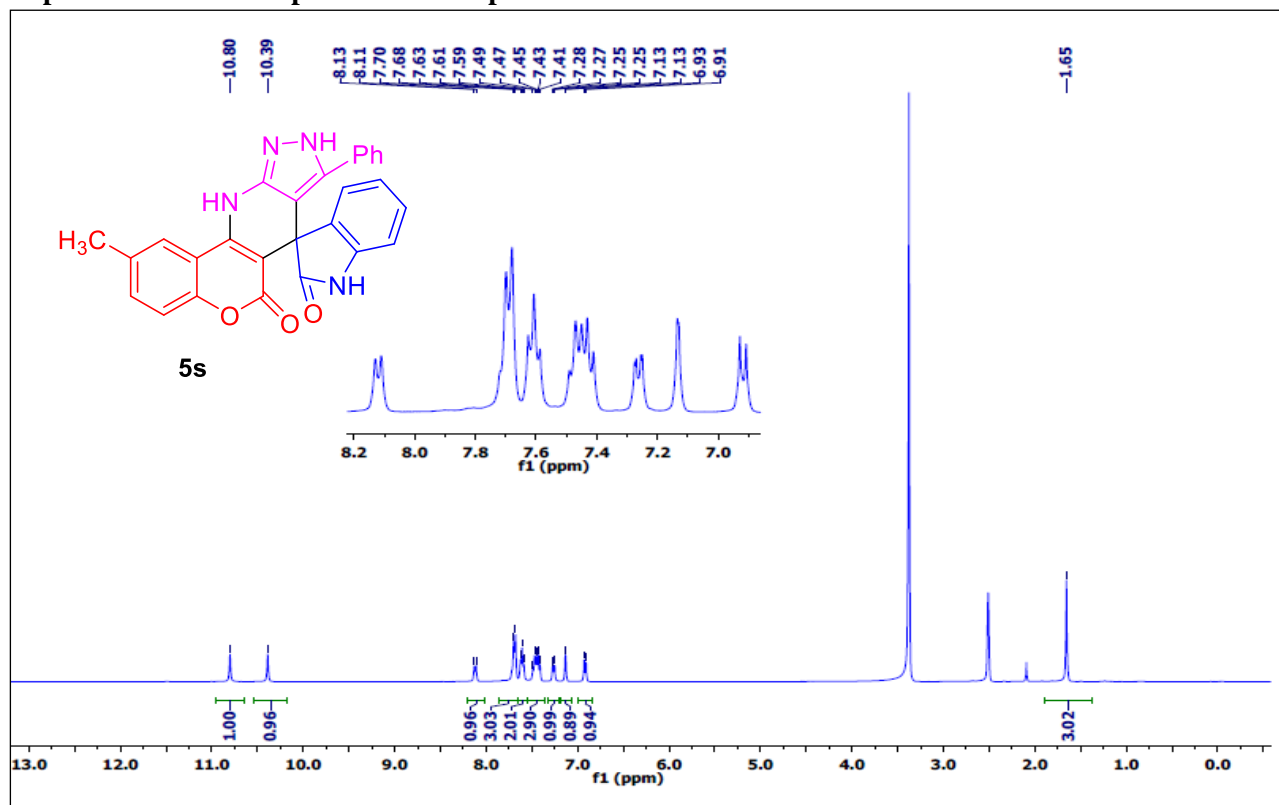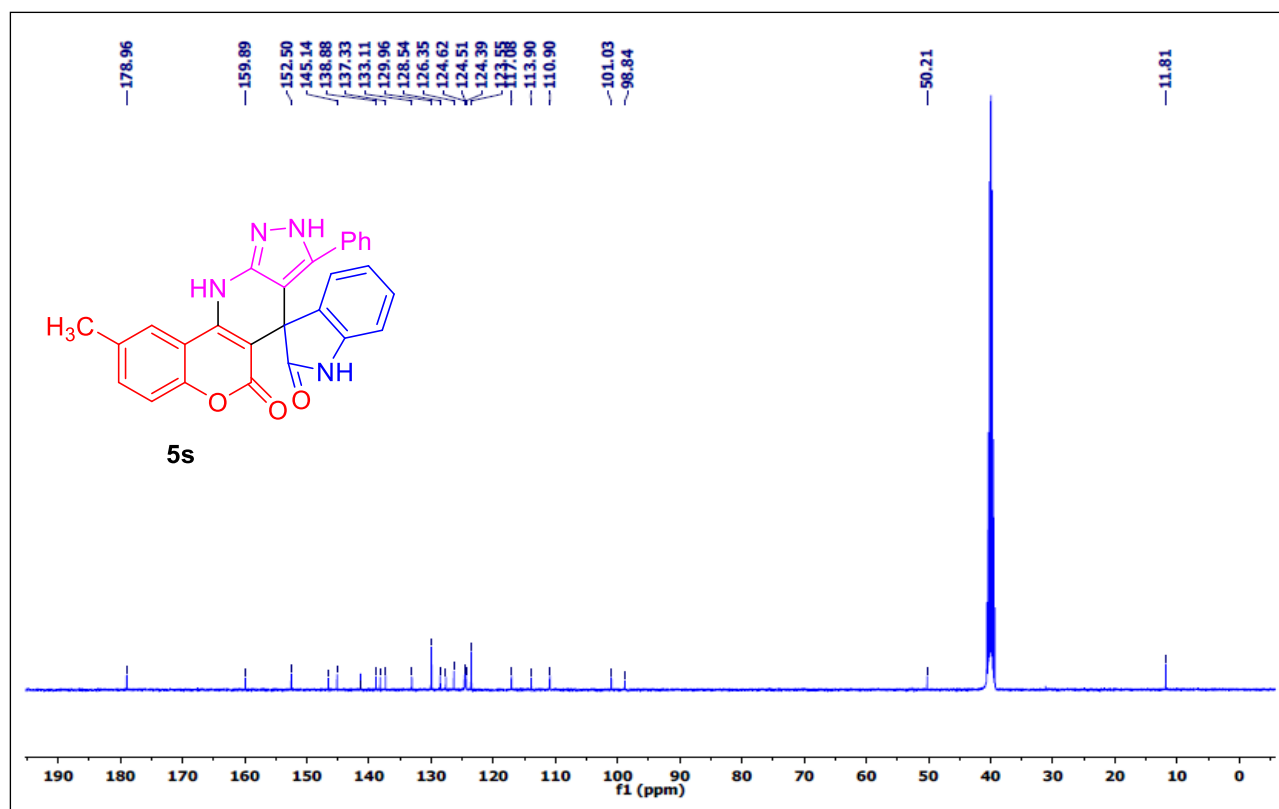

Copies of  $^1\text{H}$  and  $^{13}\text{C}$  spectrum of compound **5t**

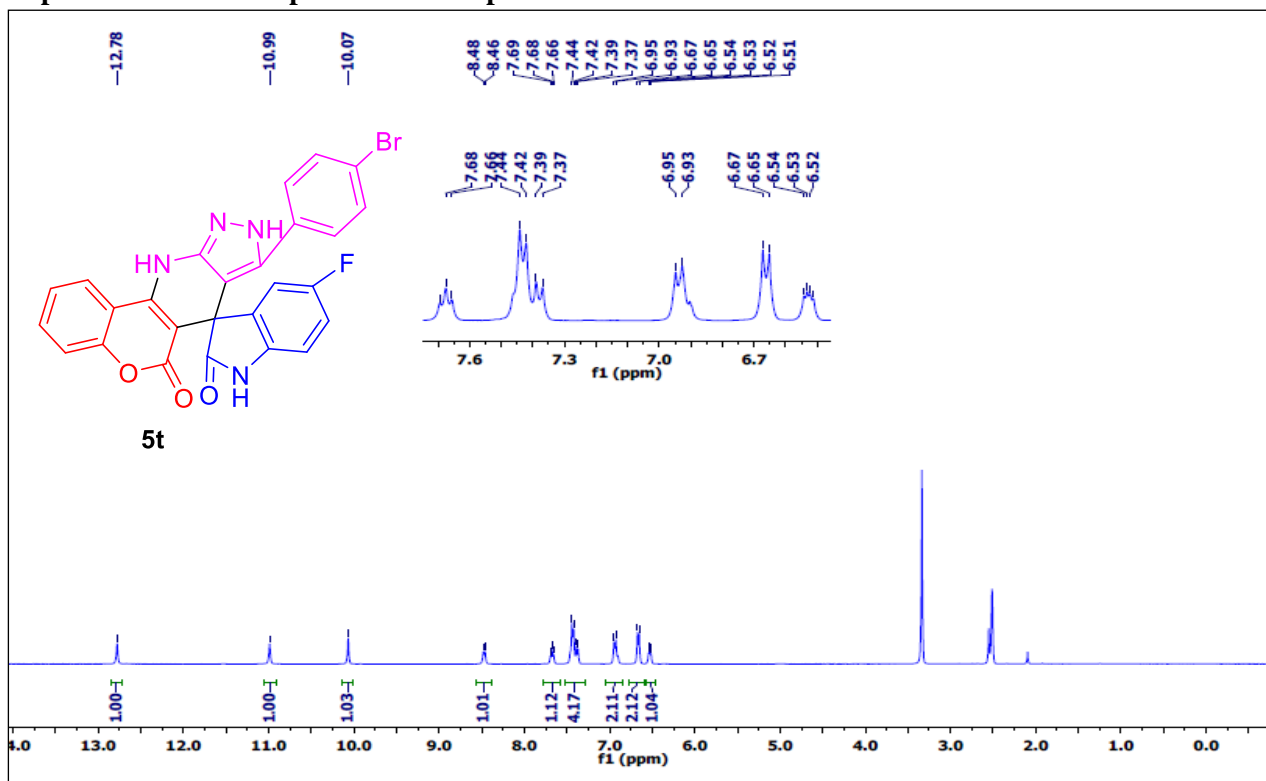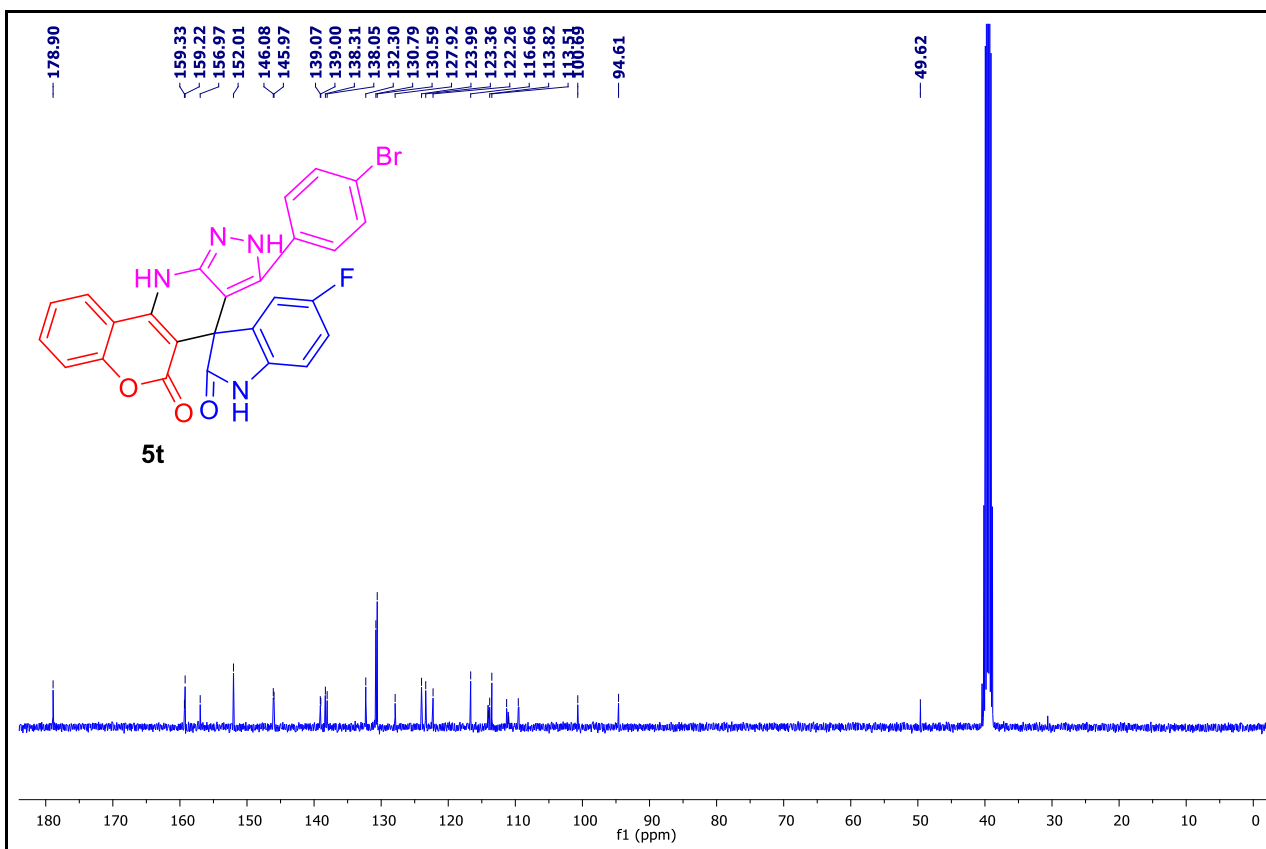

Copies of  $^1\text{H}$  and  $^{13}\text{C}$  spectrum of compound 5u

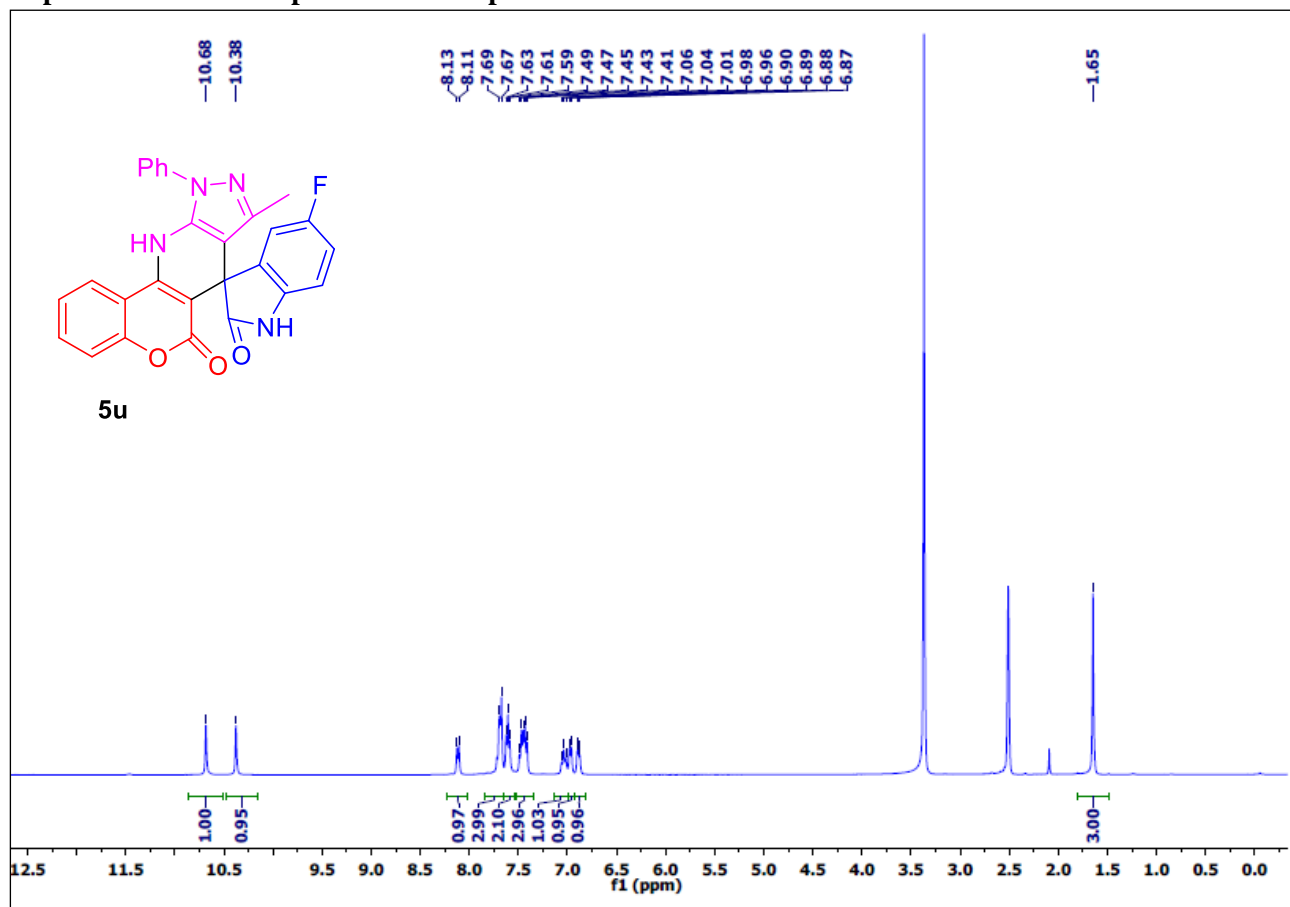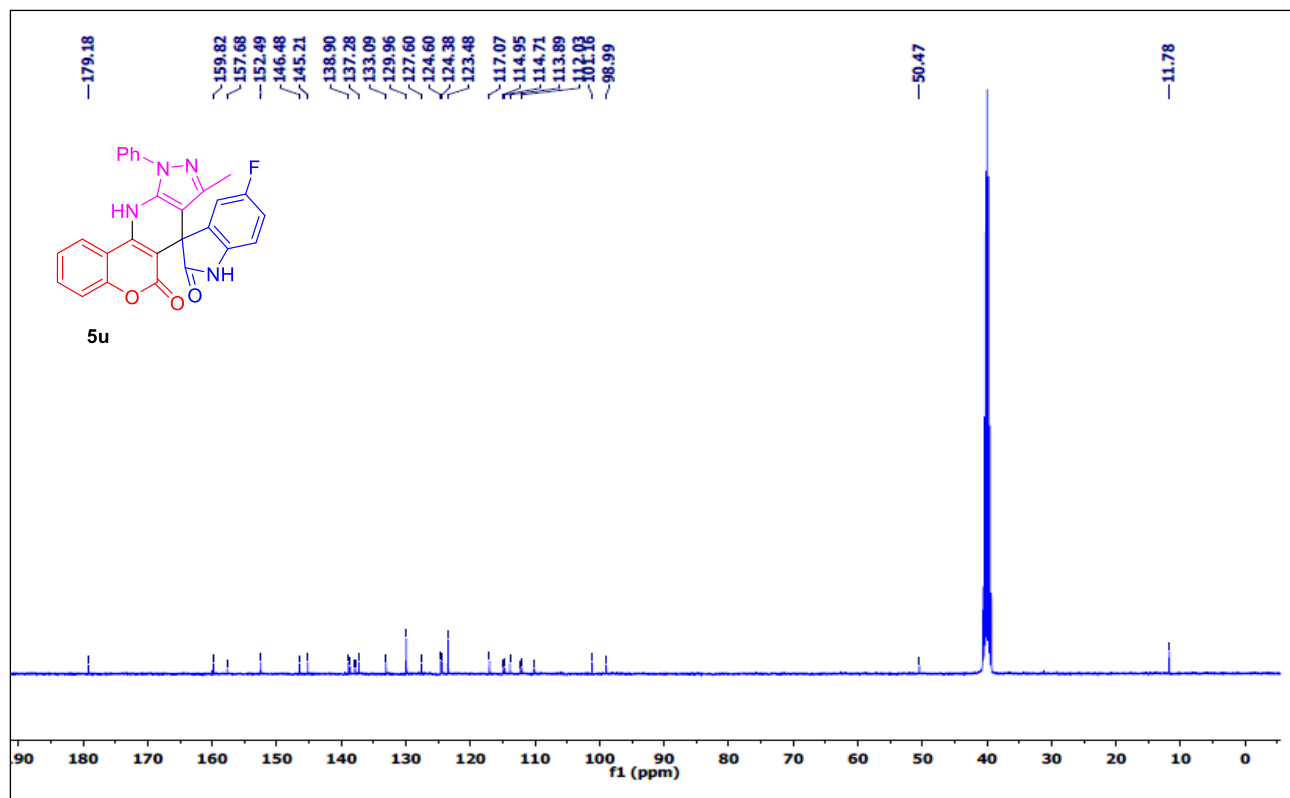



Copies of  $^1\text{H}$  and  $^{13}\text{C}$  spectrum of compound 6a

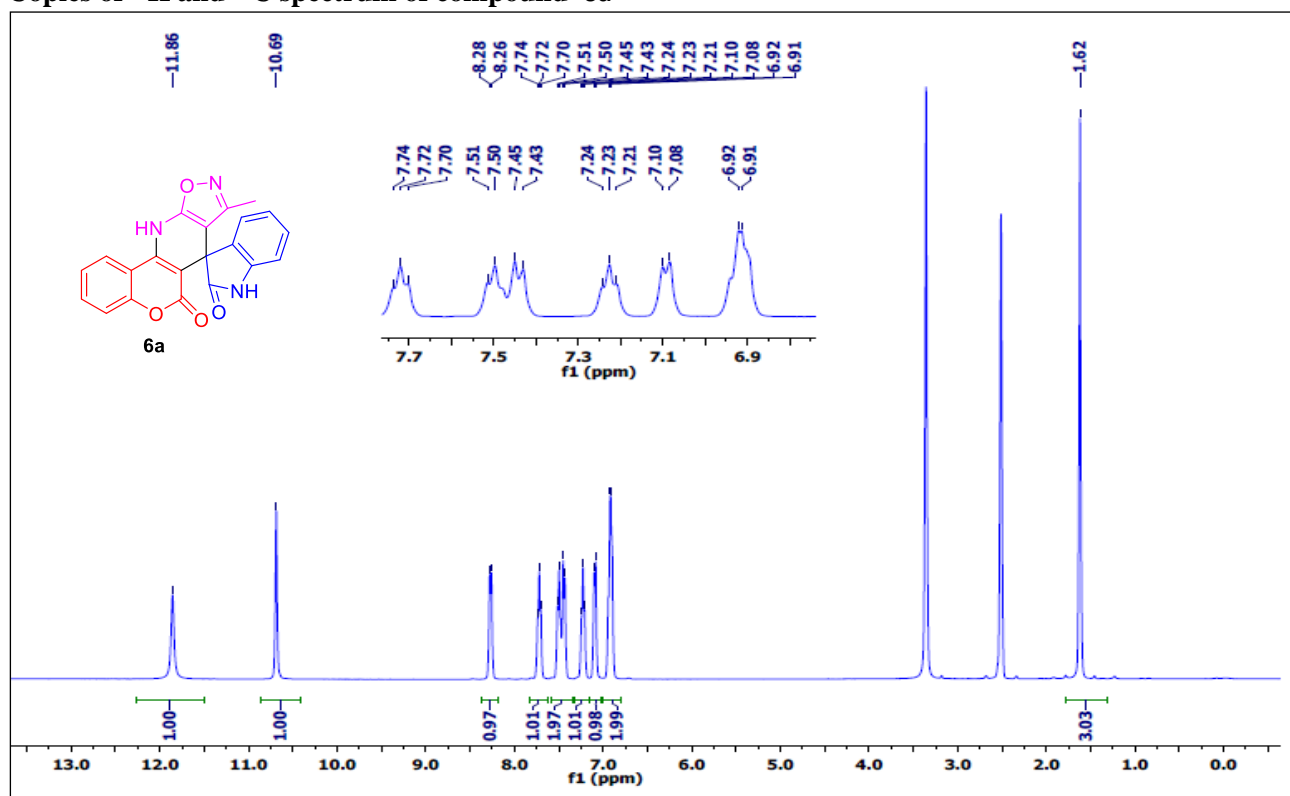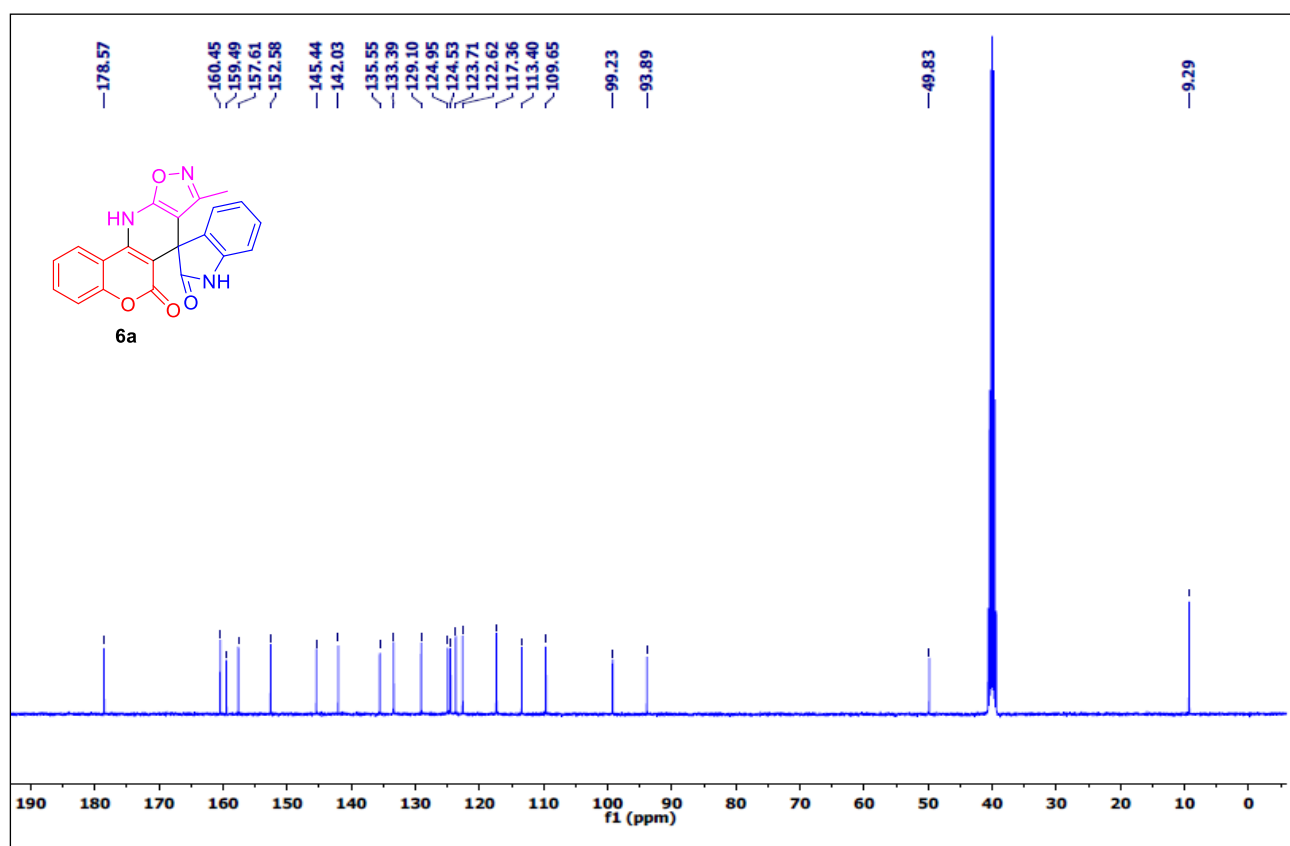

Copies of  $^1\text{H}$  and  $^{13}\text{C}$  spectrum of compound **6b**

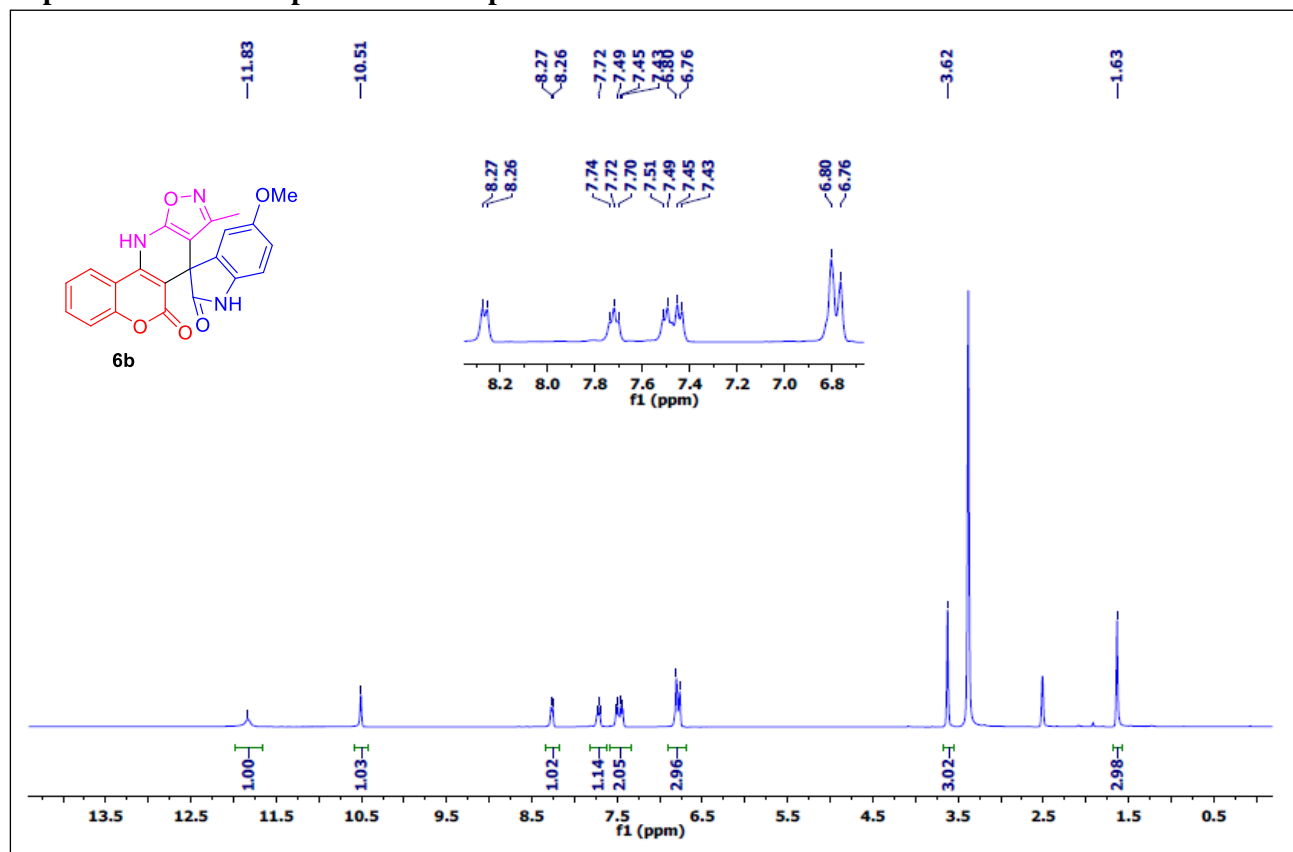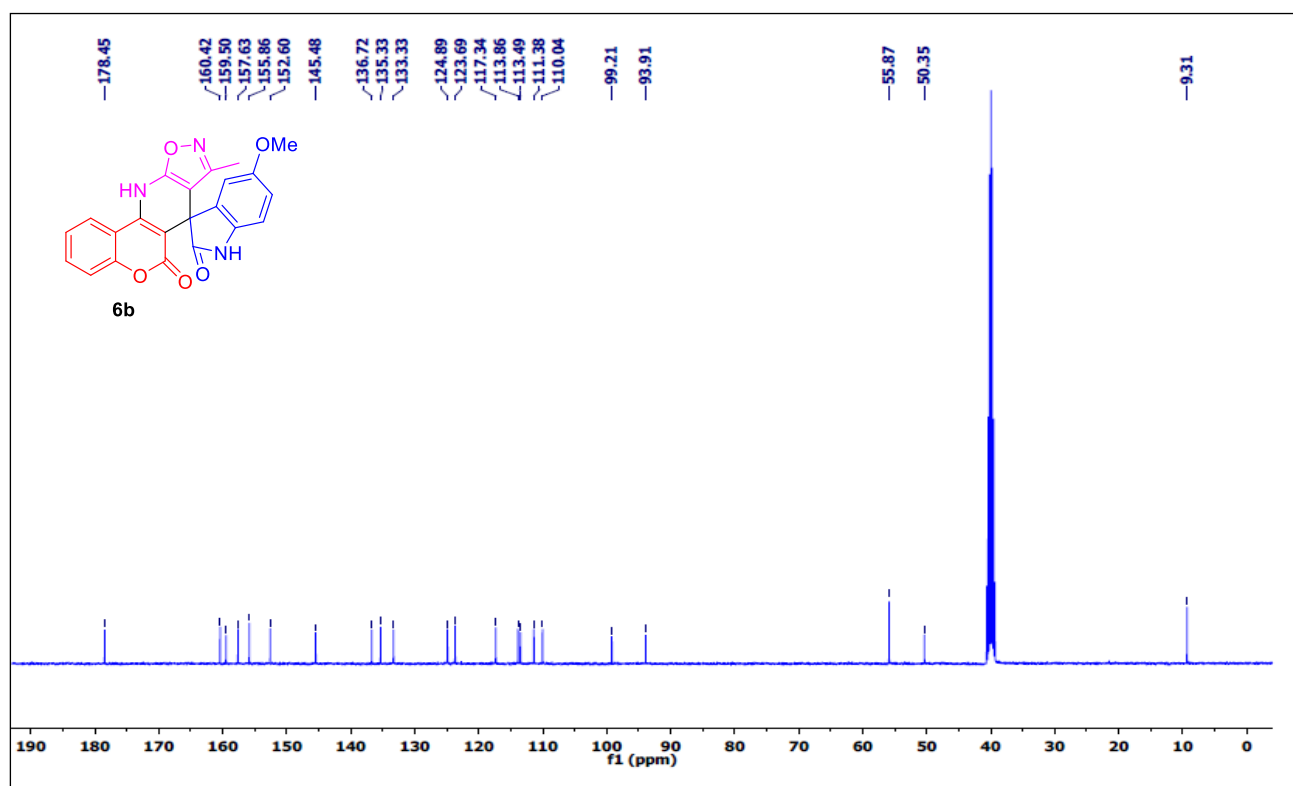

Copies of  $^1\text{H}$  and  $^{13}\text{C}$  spectrum of compound **6c**

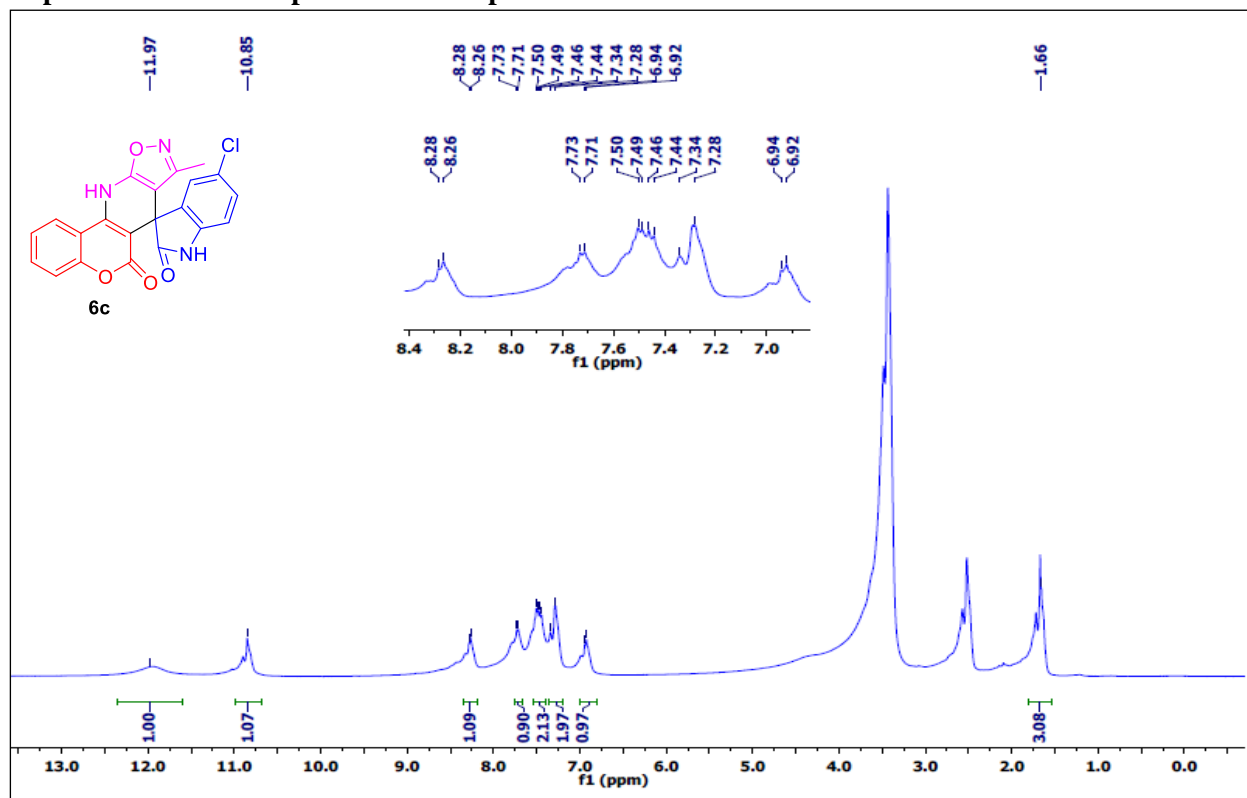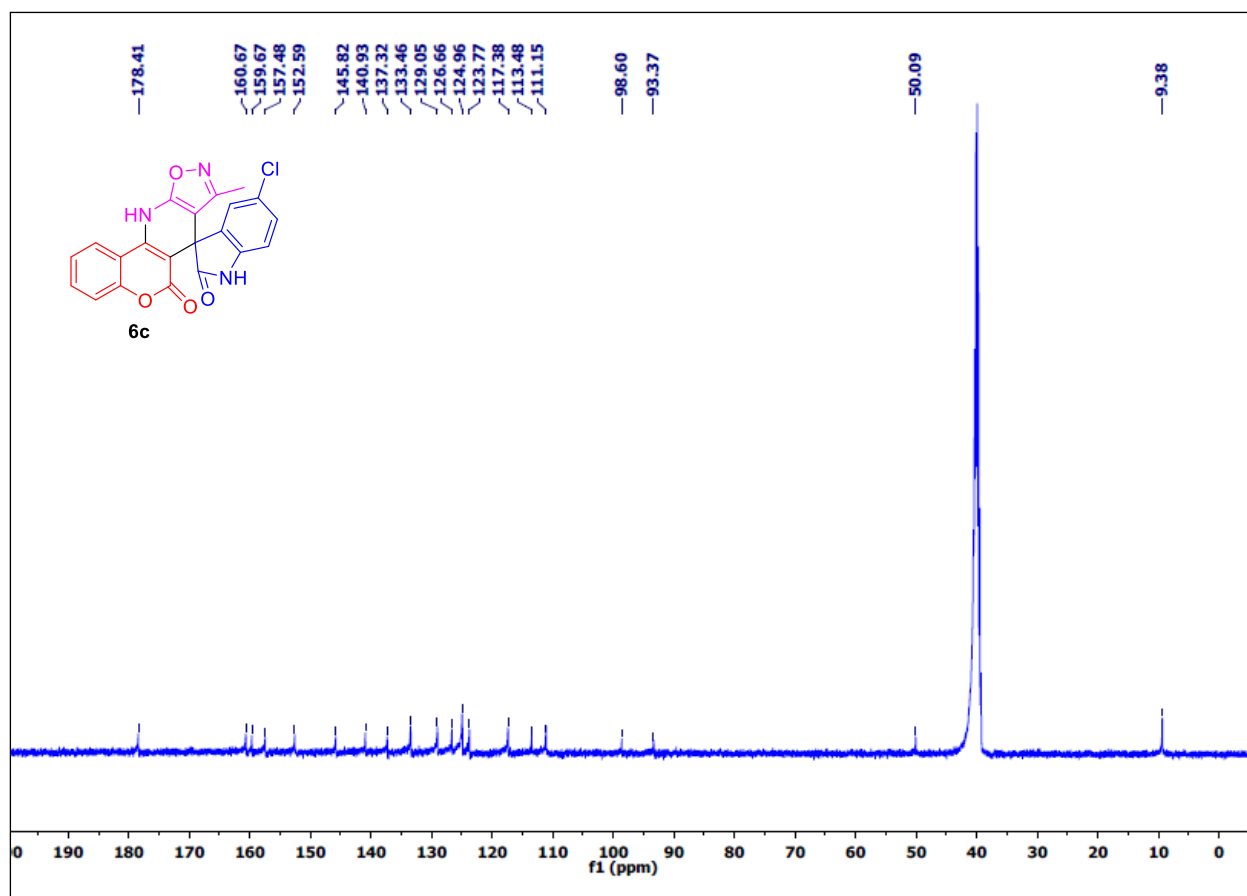

Copies of  $^1\text{H}$  and  $^{13}\text{C}$  spectrum of compound 6d

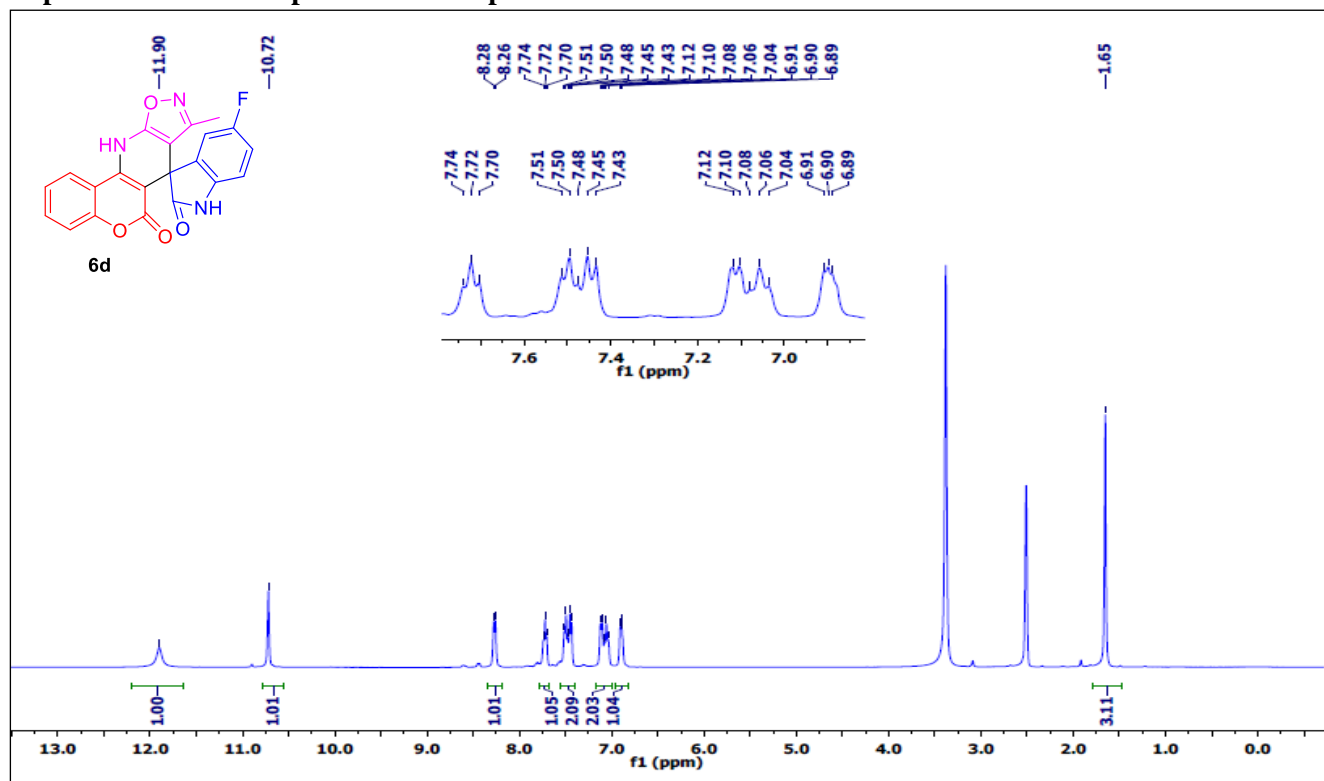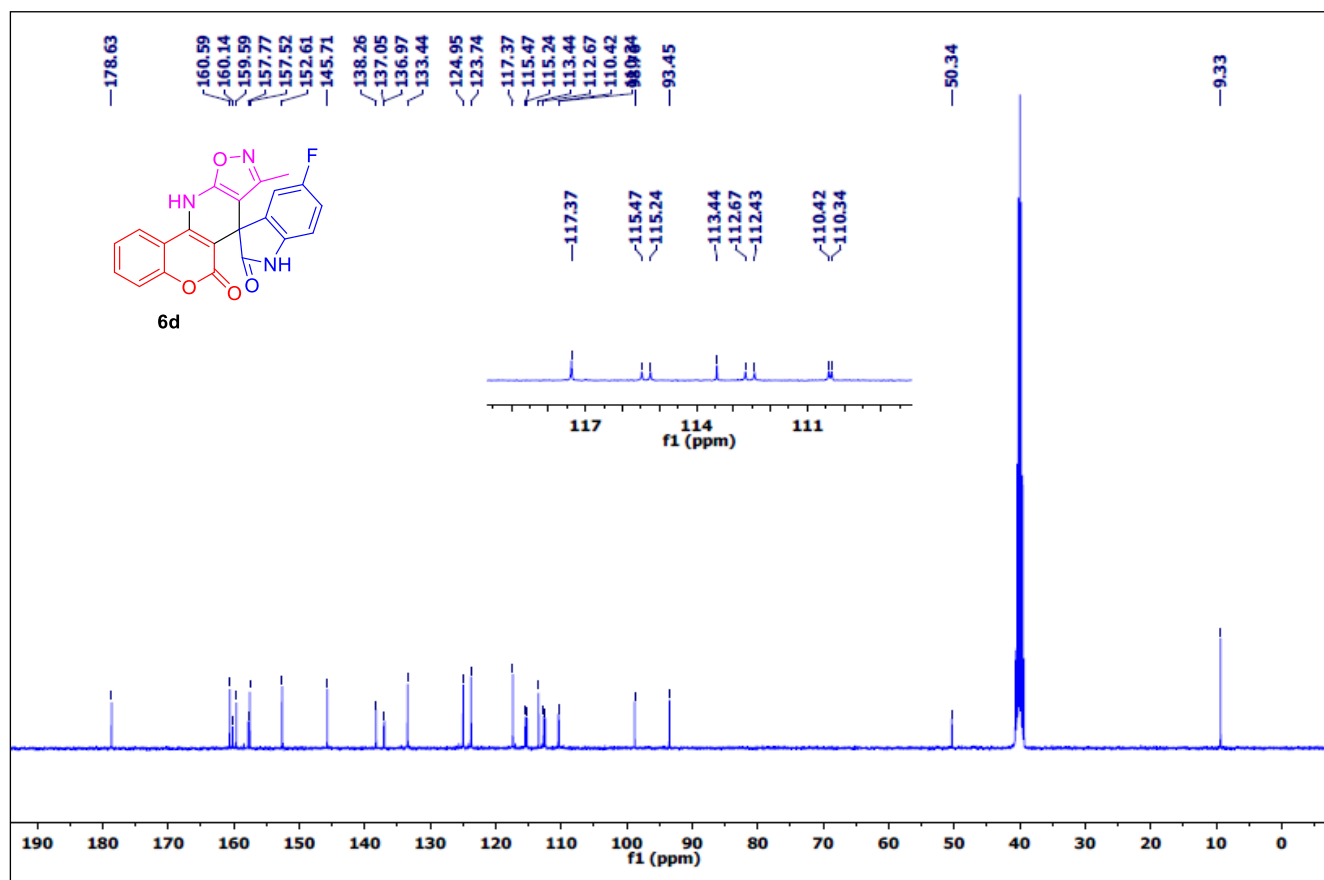

Copies of  $^1\text{H}$  and  $^{13}\text{C}$  spectrum of compound 6e

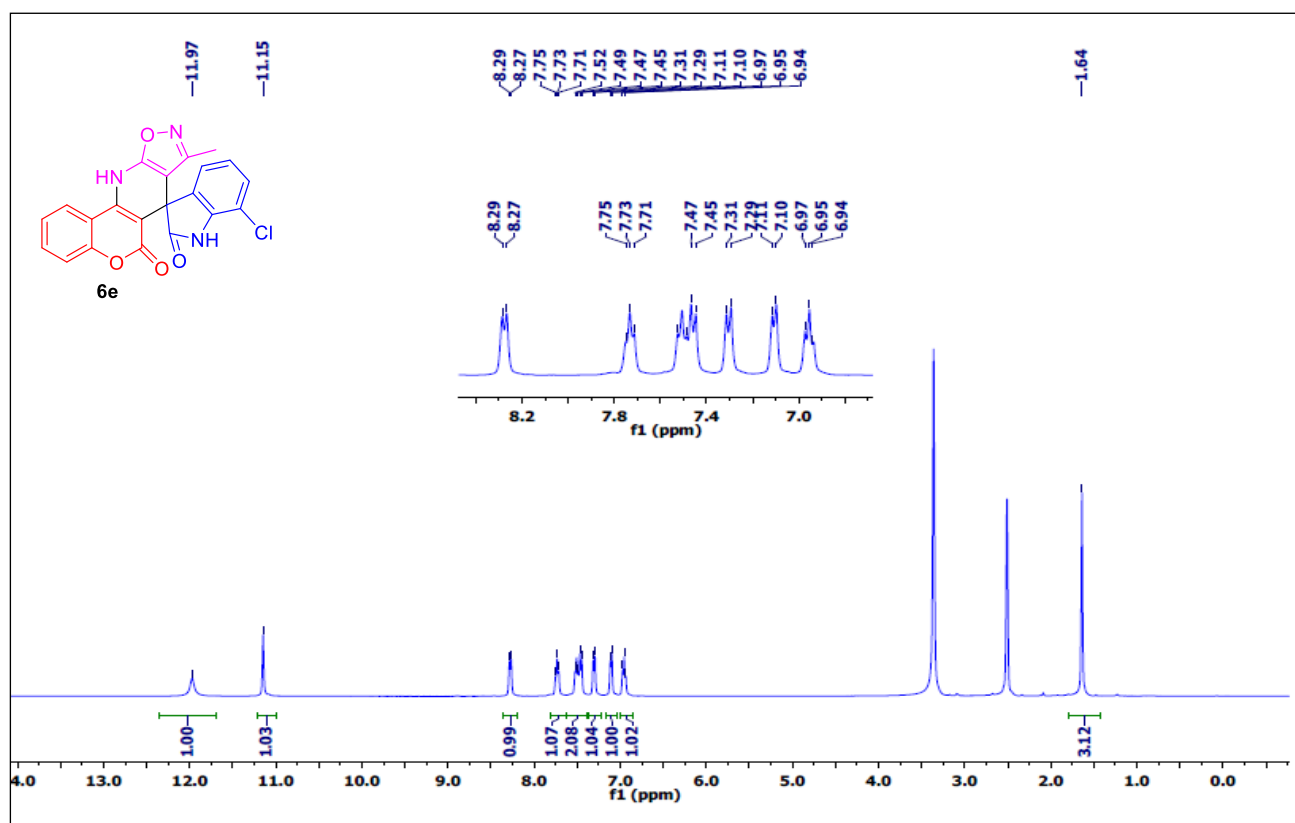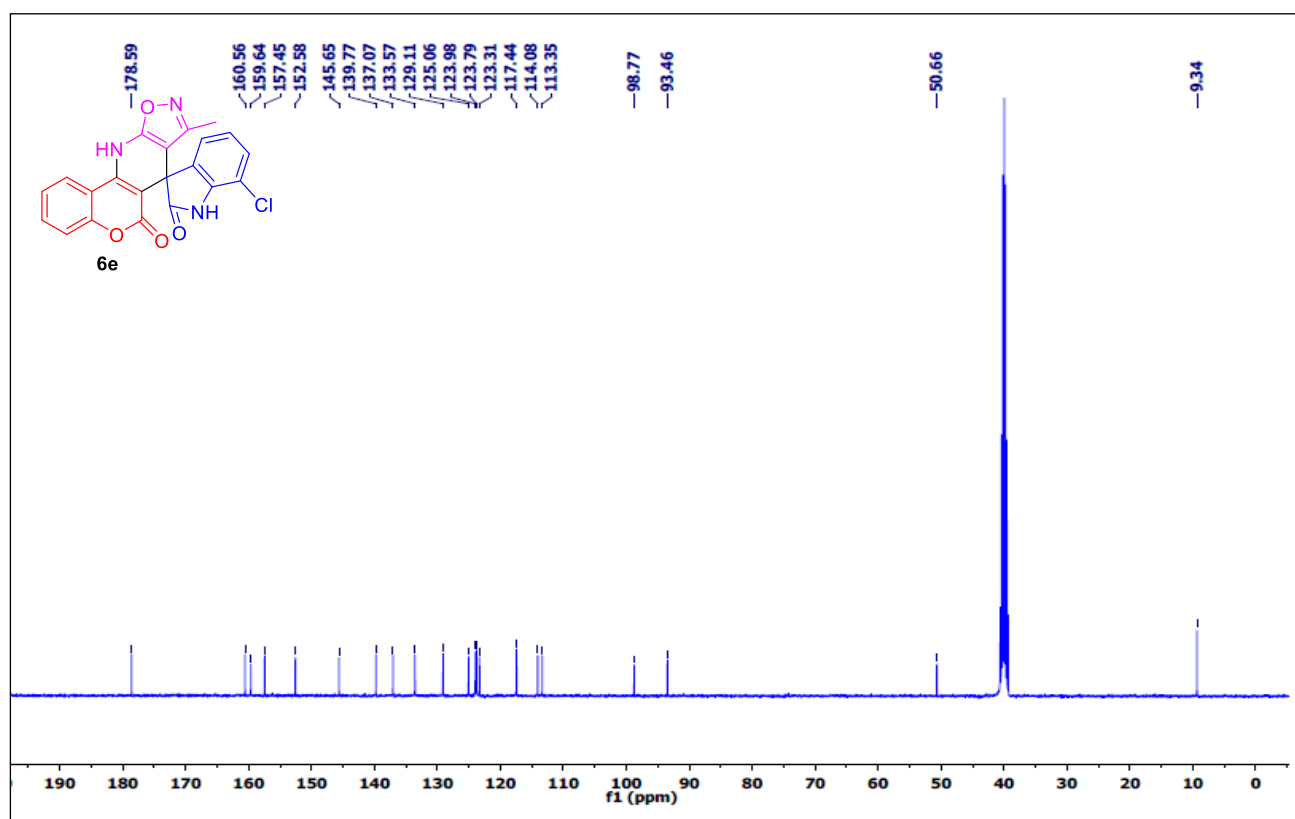

Copies of  $^1\text{H}$  and  $^{13}\text{C}$  spectrum of compound **6f**

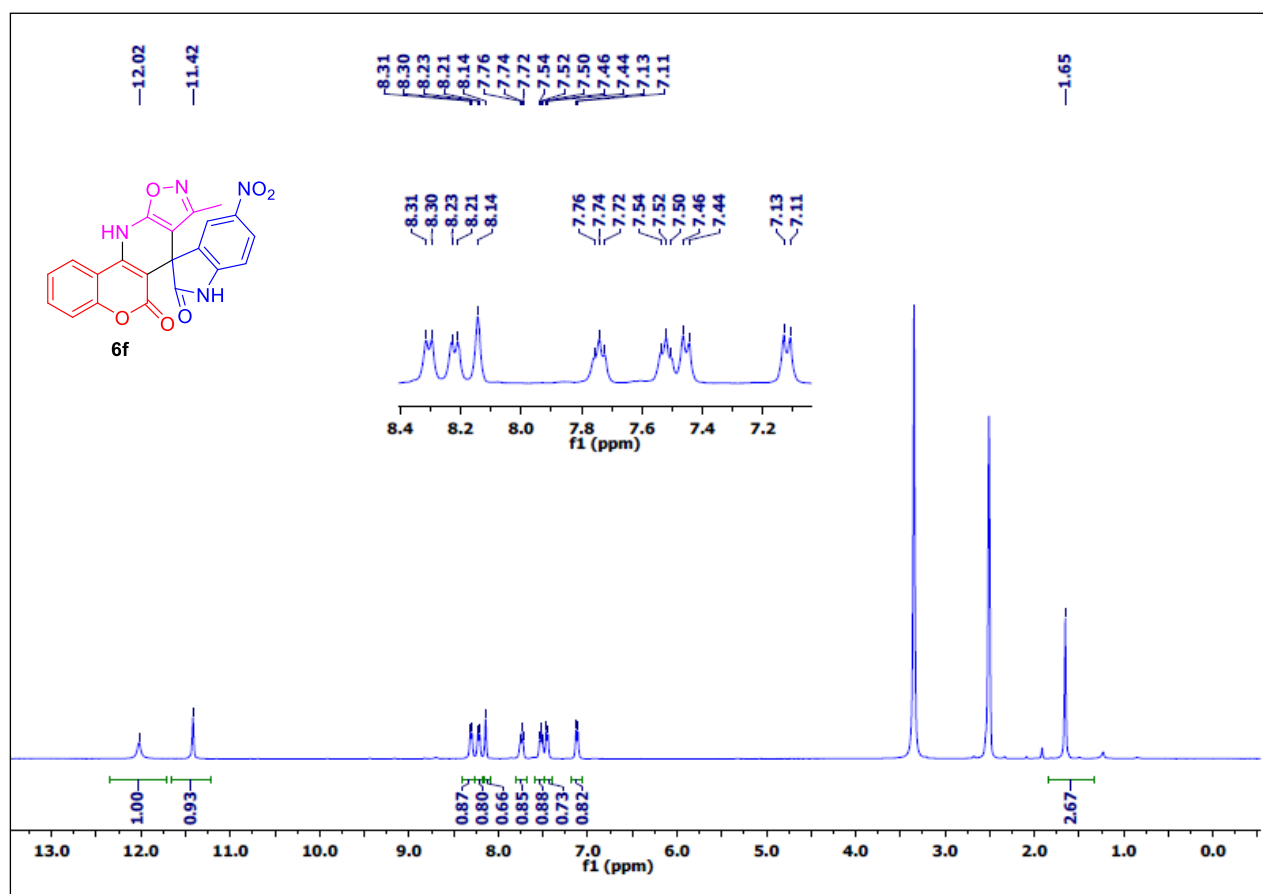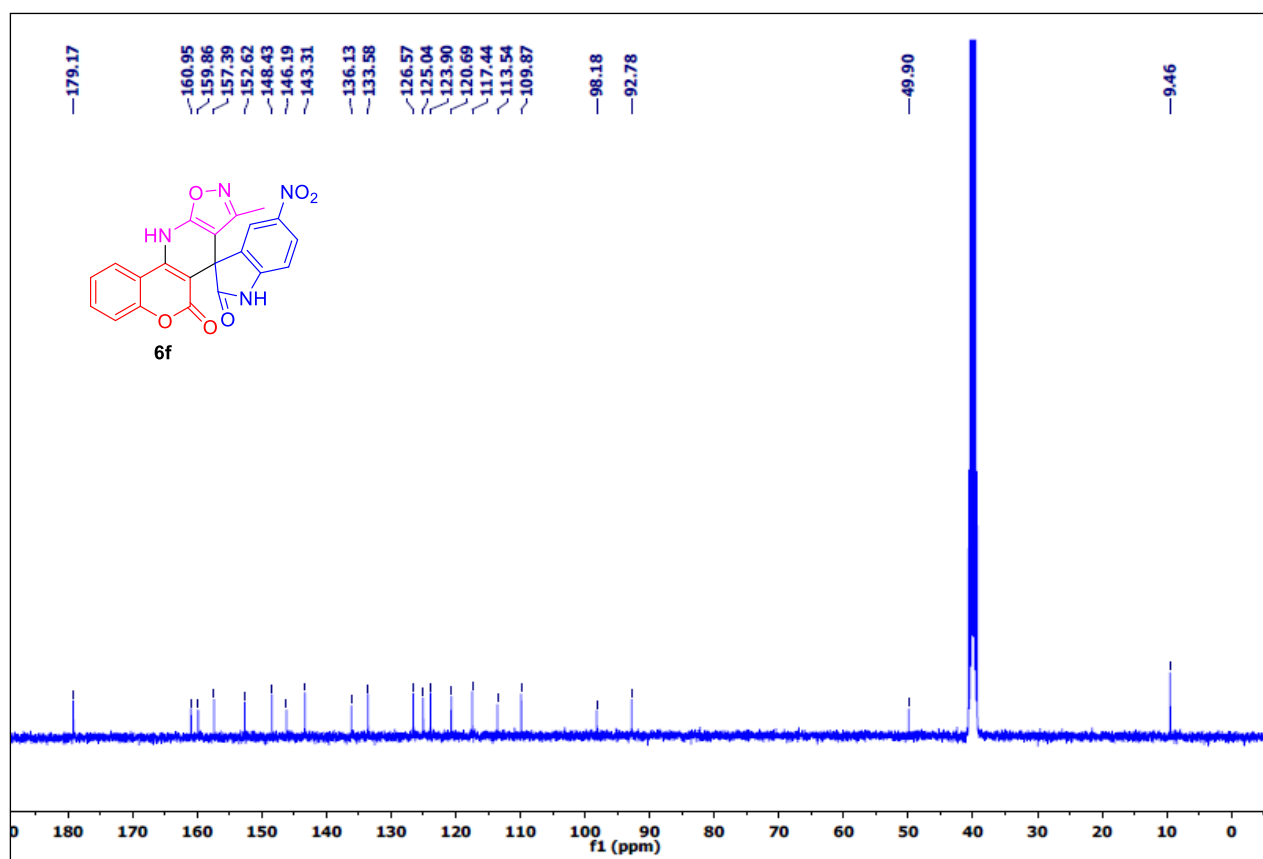

Copies of  $^1\text{H}$  and  $^{13}\text{C}$  spectrum of compound 6g

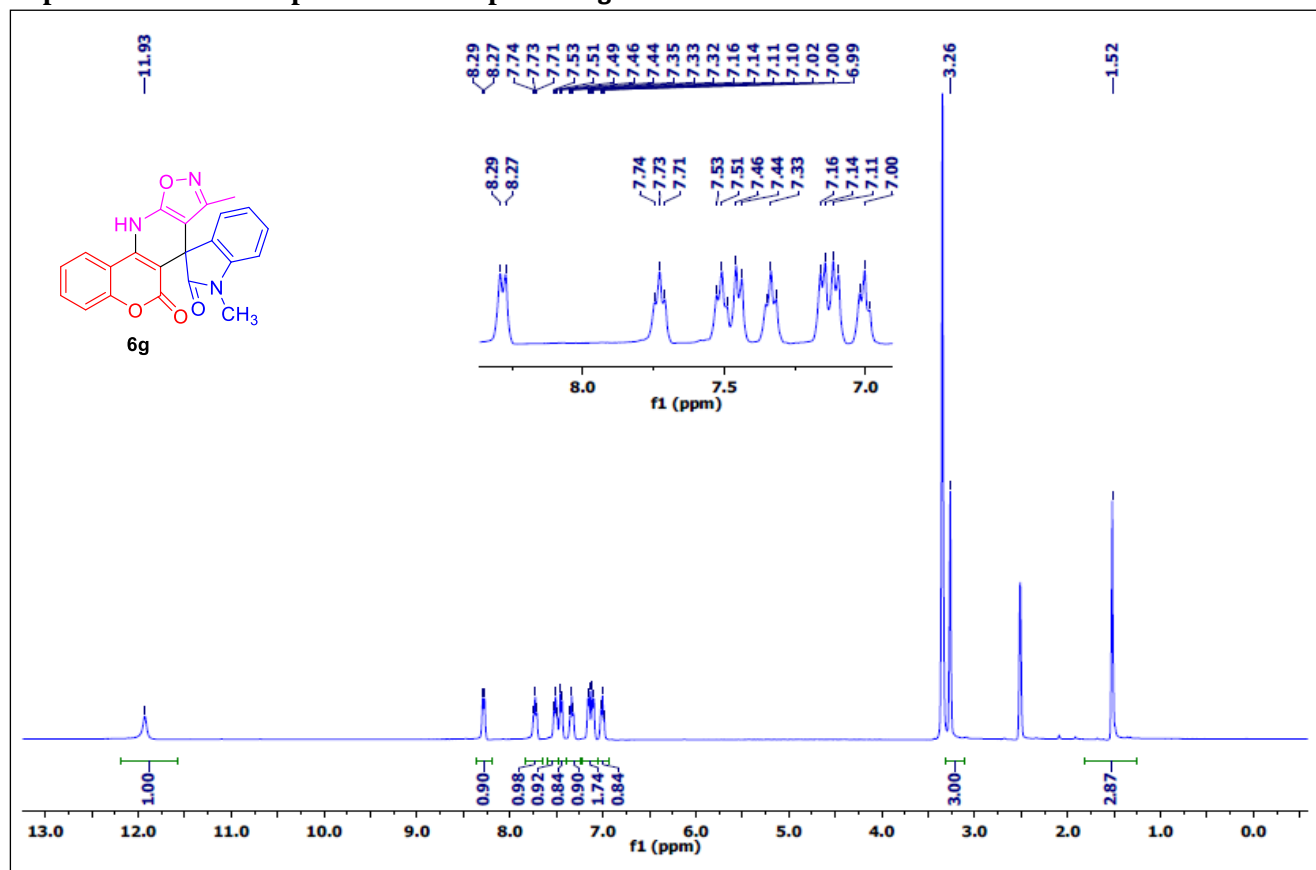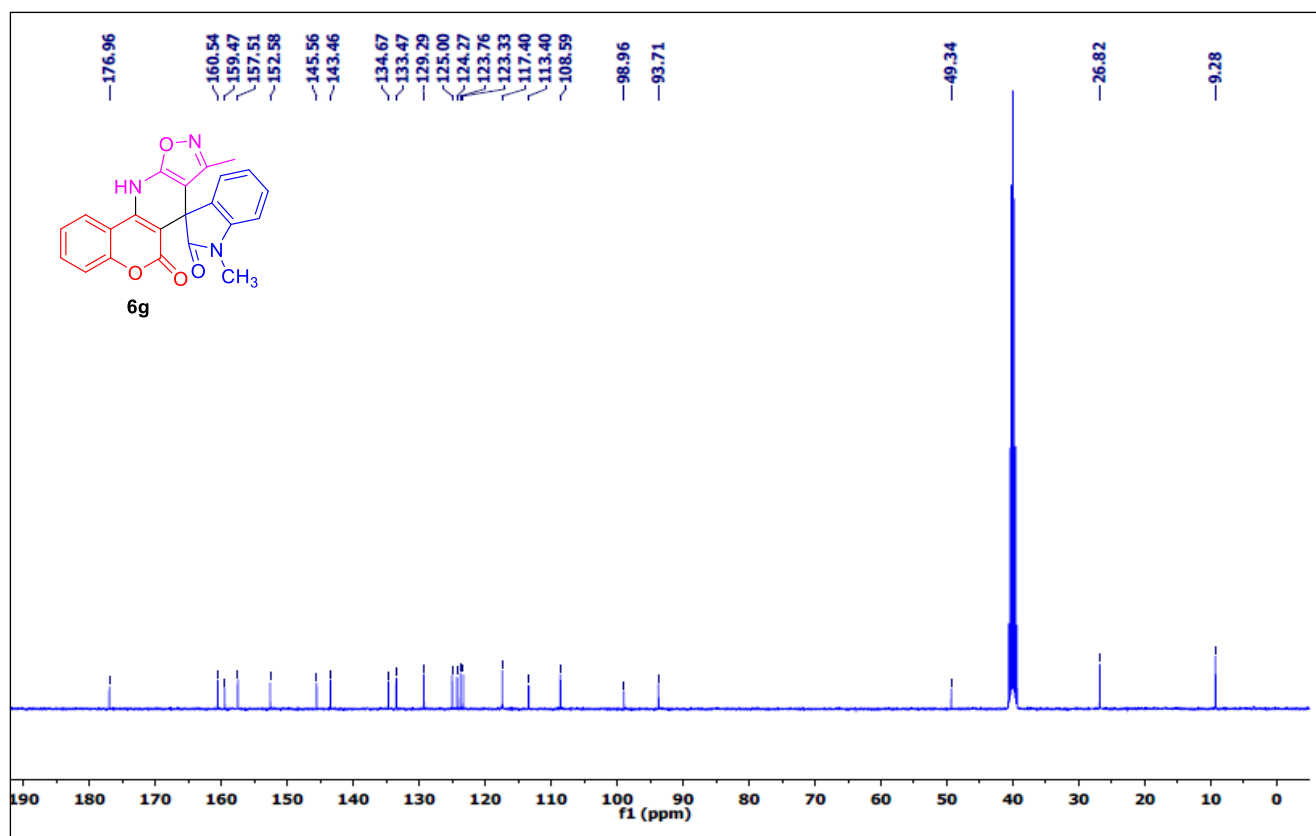

Copies of  $^1\text{H}$  and  $^{13}\text{C}$  spectrum of compound 6h

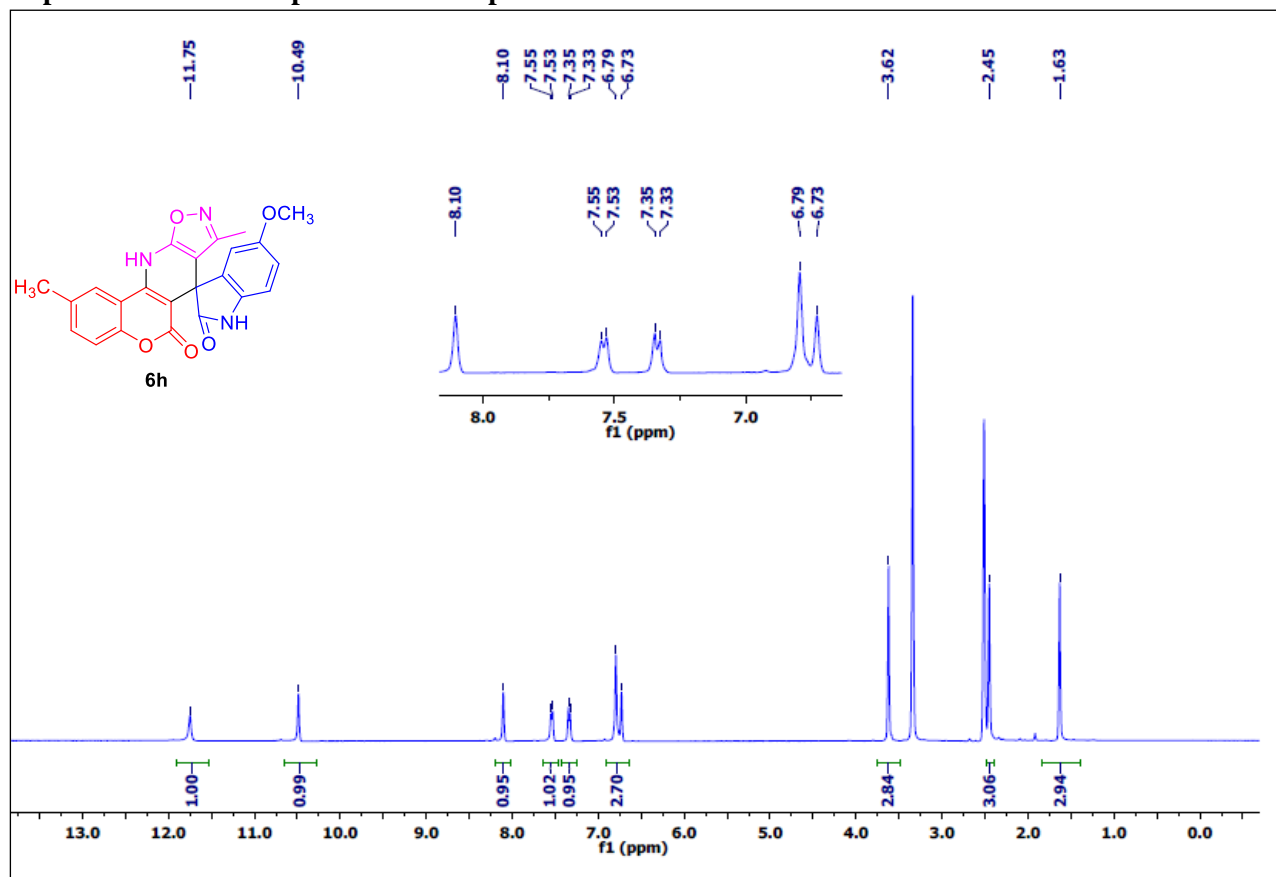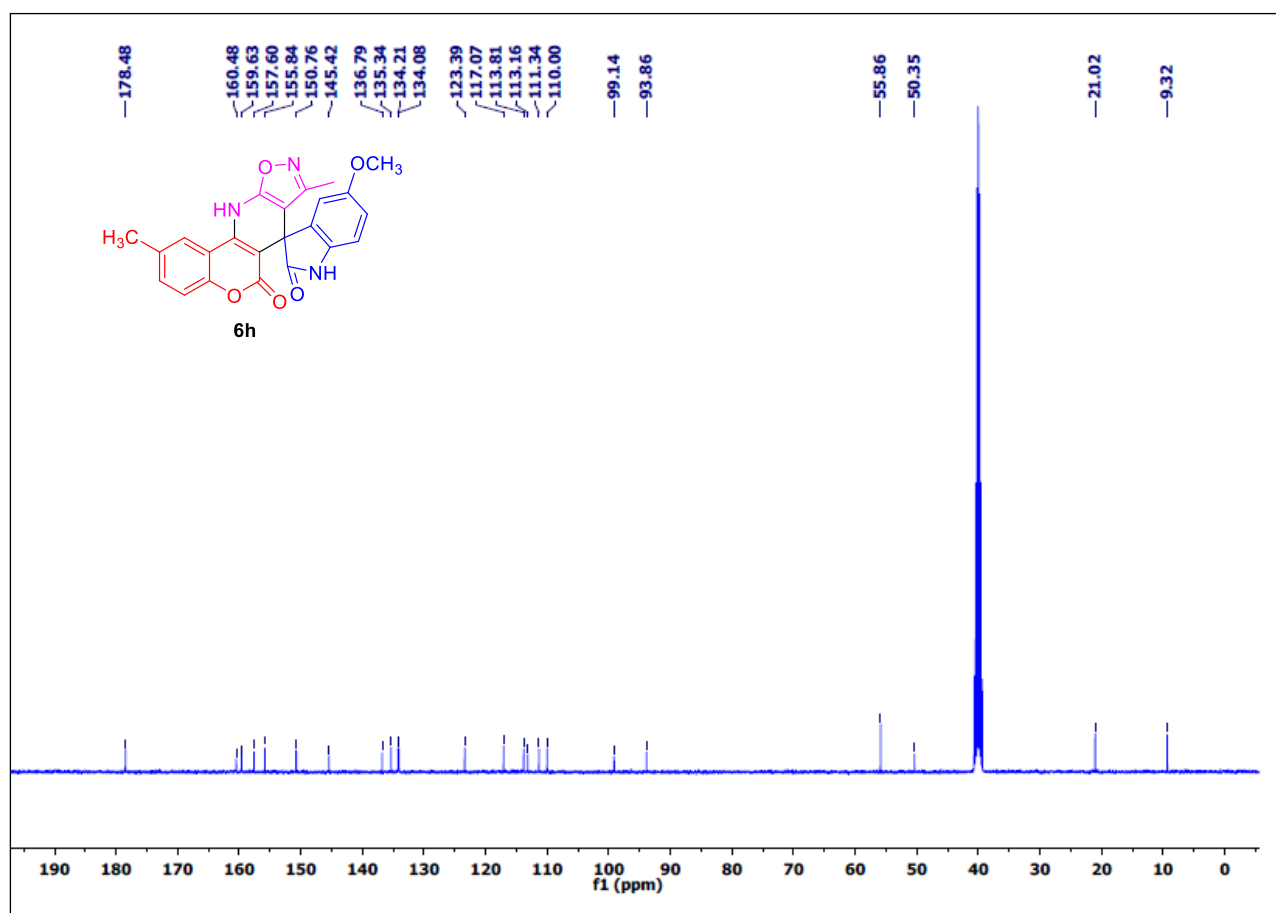



Copies of  $^1\text{H}$  and  $^{13}\text{C}$  spectrum of compound **6i**

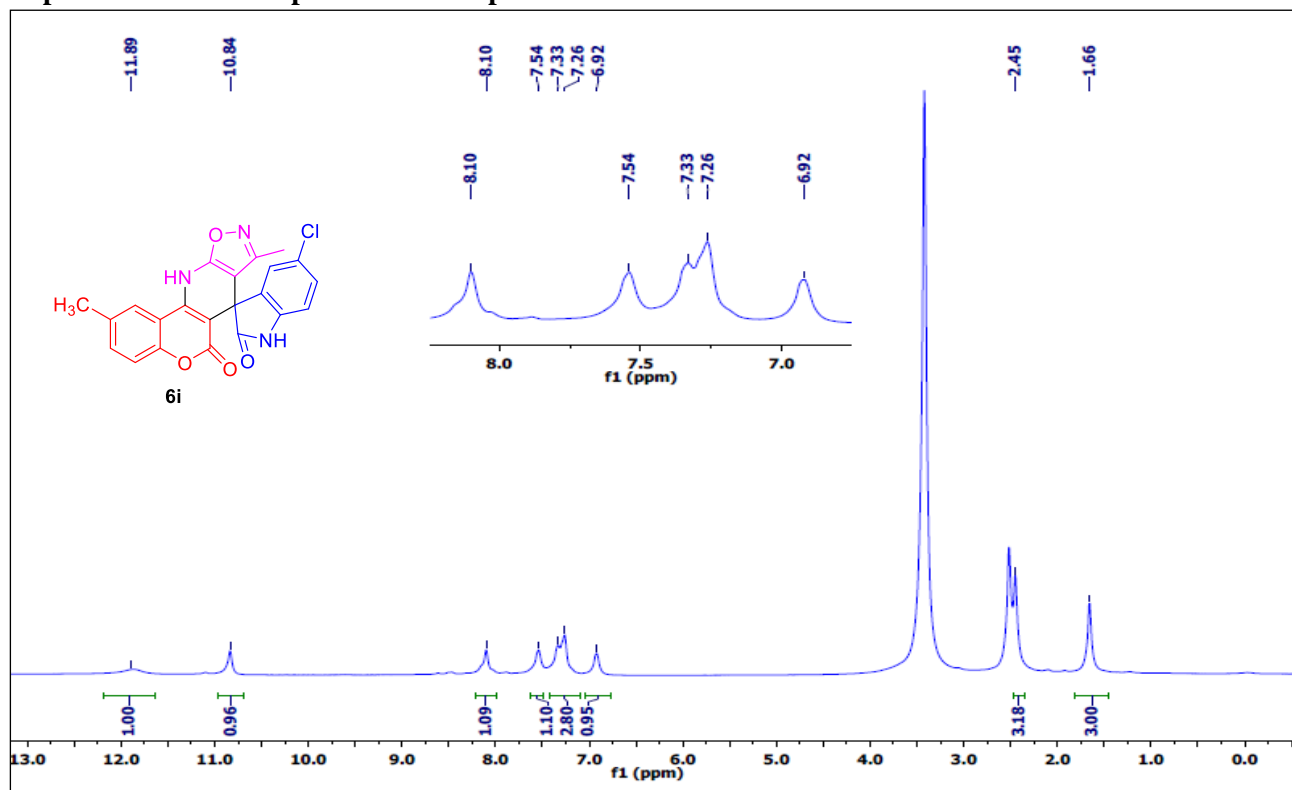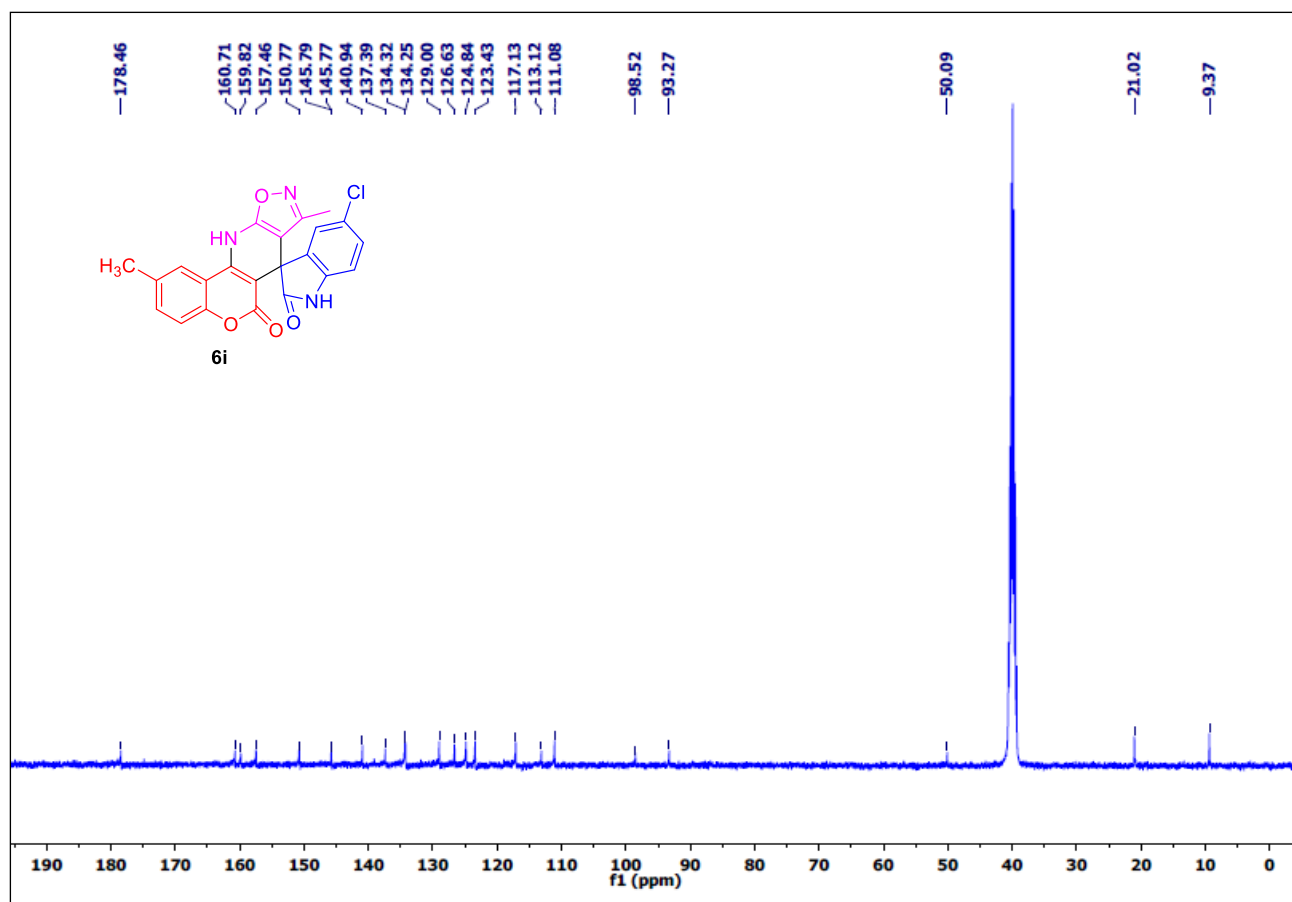

Copies of  $^1\text{H}$  and  $^{13}\text{C}$  spectrum of compound 6j

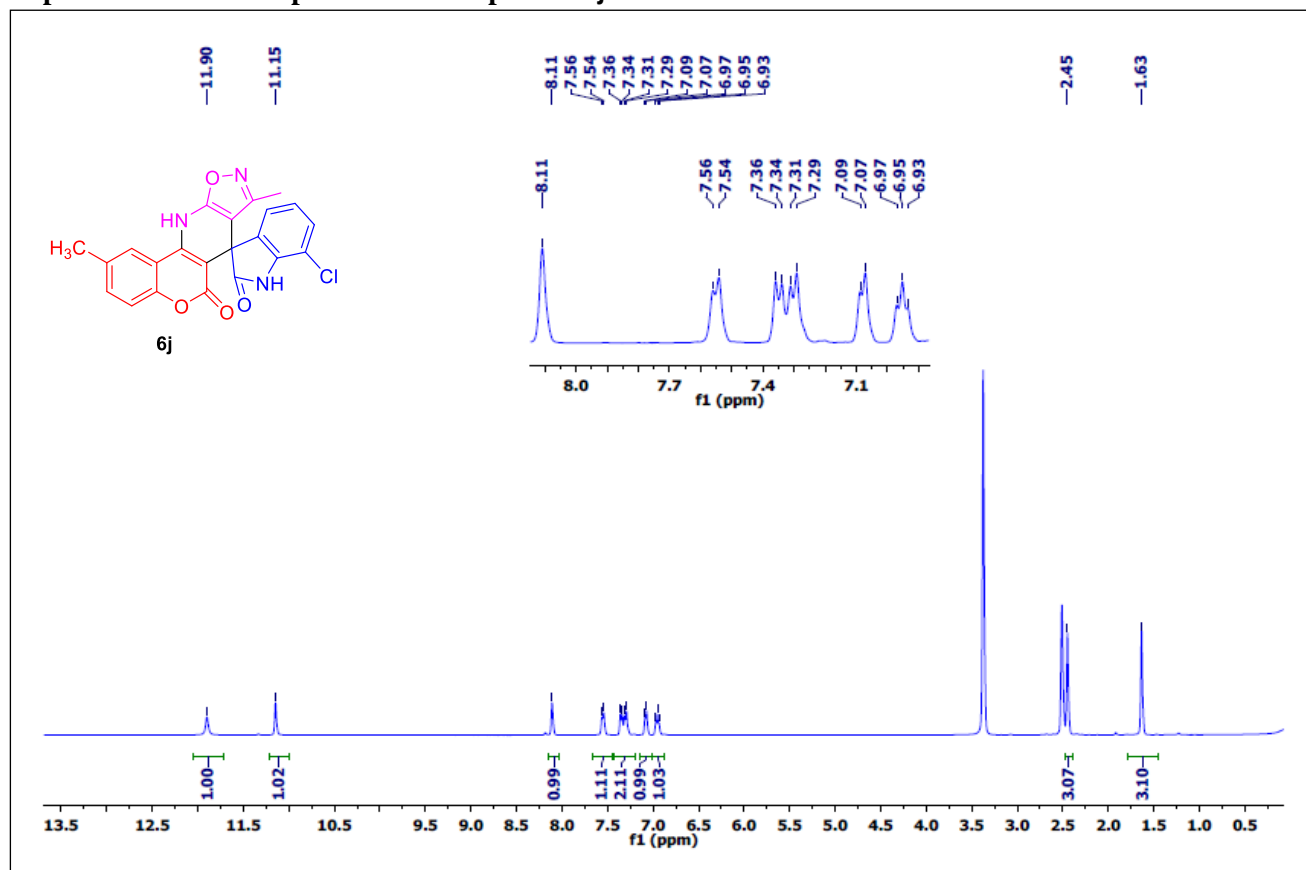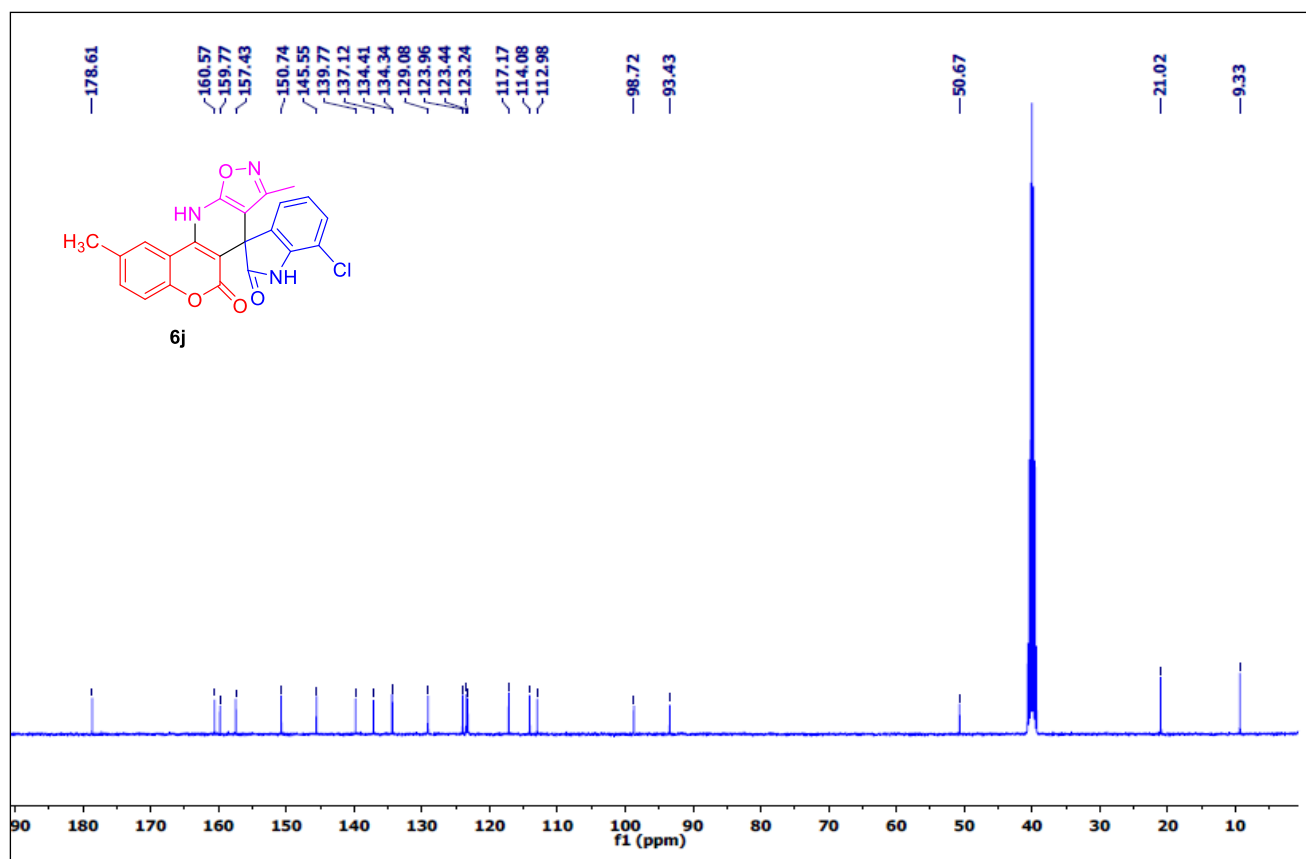

Copies of  $^1\text{H}$  and  $^{13}\text{C}$  spectrum of compound 6k

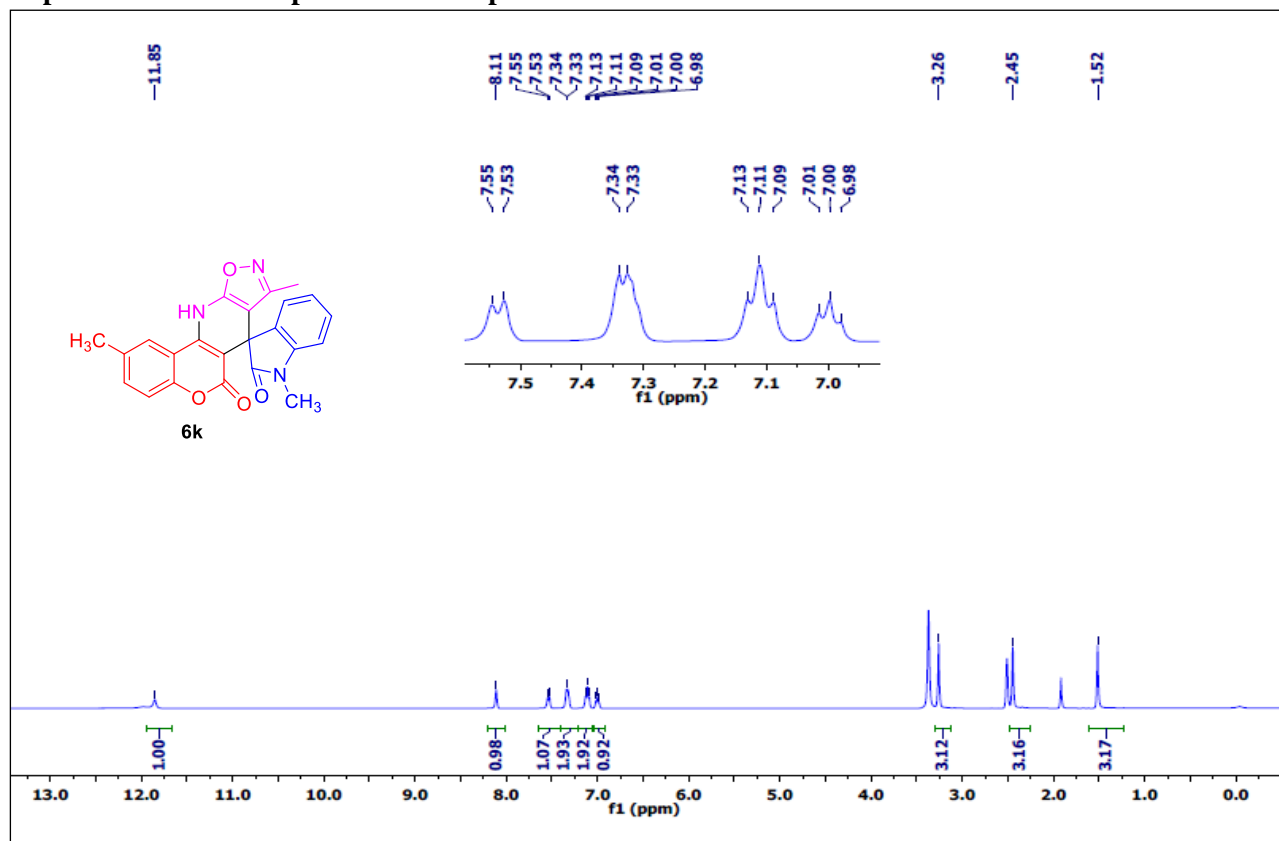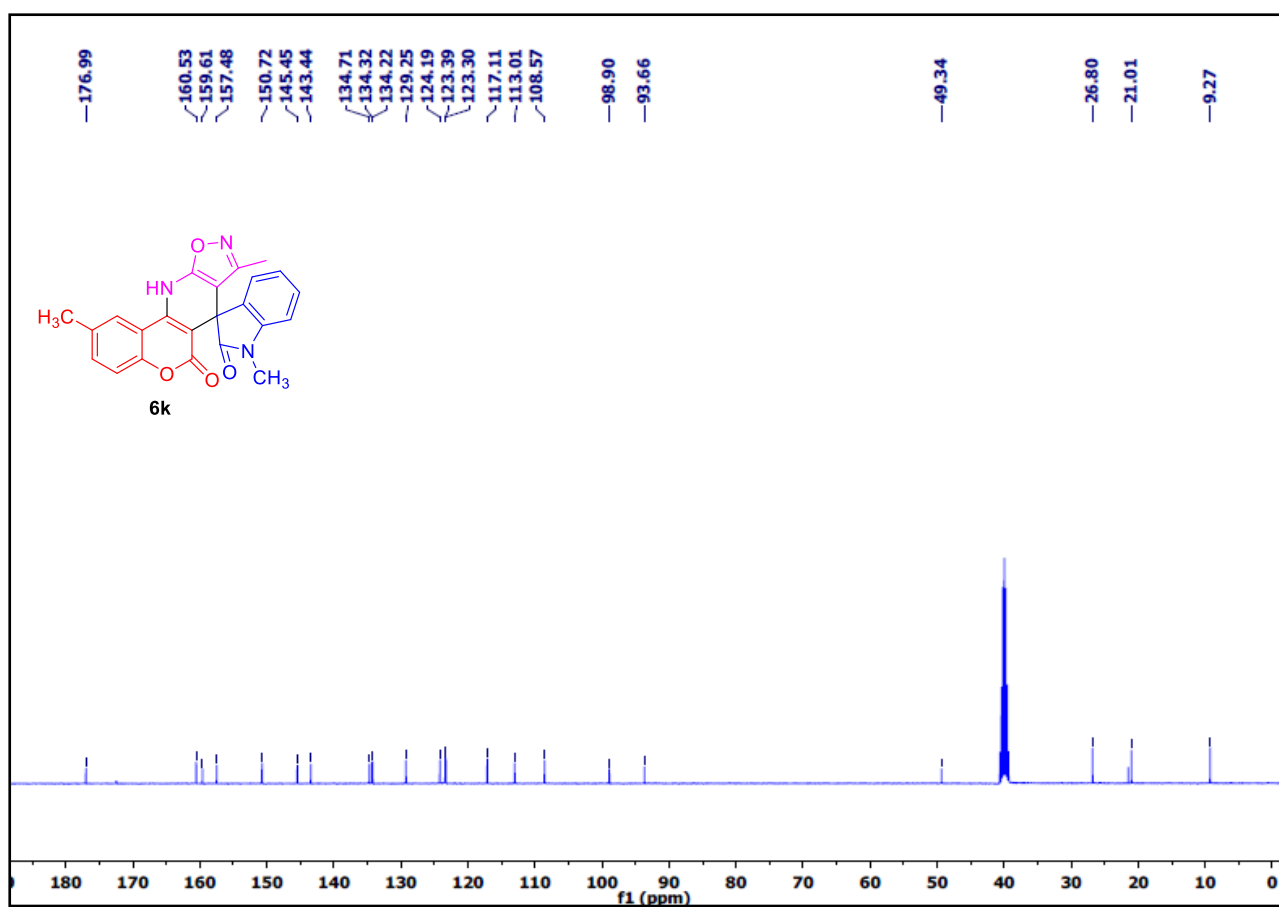

## Single-Crystal X-Ray Diffraction data

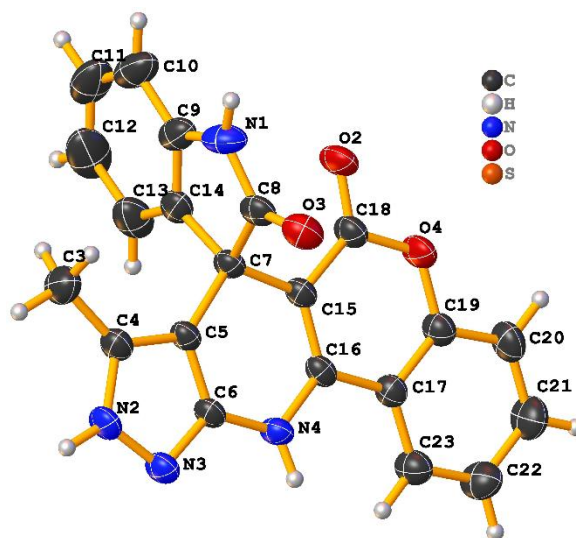

**Figure S1.** Ortep diagram of **5a** with 50% ellipsoidal probability. (CCDC 1832278 ).

A suitable single crystal of compound **5a** was carefully selected under a polarizing microscope and mounted at the tip of the thin glass fiber using cyanoacrylate (super glue) adhesive. Single crystal structure determination by X-ray diffraction was performed on a Bruker Smart Apex III diffractometer equipped with an Oxford Cryostream low-temperature device and a fine-focus sealed-tube X-ray source (Mo-K $\alpha$  radiation,  $\lambda = 0.71073$  Å, graphite monochromated) operating at 50 kV and 30 mA. The structure was solved by direct methods using SHELXS-97. For the final refinement, the hydrogen atoms of the compound was placed geometrically and held in the riding mode. The last cycles of refinement included atomic positions, anisotropic thermal parameters for all the non-hydrogen atoms, and isotropic thermal parameters for all the hydrogen atoms. Details of the structure determination and final refinements for the compound **5a** are given below.

## Crystal data and Structure refinement for **5a**

APEX3 software<sup>17</sup> was used for preliminary determination of the unit cell. Crystal structure was solved and refined using SHELXL97,<sup>18</sup> present in the WINGX package of the programs (v 1.63.04a). Data were corrected for absorption effects with SADABS using the multiscan technique.<sup>19</sup> XPREP<sup>17</sup> determined the space to be Pbca, with  $z = 4$  for the formula unit,  $C_{23}H_{19}N_4O_4S$ . The final anisotropic full-matrix least squares refinement on  $F_o^2$  with 336 variables converged at  $R_1 = 4.75\%$  for the observed data and  $wR_2 = 11.22\%$  for all data. The standard deviation<sup>20</sup> of an observation of unit weight was 1.068. Unit weights were used (least squares function minimized: (SHELXL-2014/7)<sup>28</sup>:  $\sum w (F_o^2 - F_c^2)^2$  where  $w$  is the least squares weights. Standard deviation of an observation of unit weight:  $[\sum w (F_o^2 - F_c^2)^2 / (N_o - N_v)]^{1/2}$  where  $N_o$  is the number of observations,  $N_v$  is the number of variables). The largest peak on the final difference electron density synthesis was  $0.215 \text{ e}/\text{\AA}^{-3}$  and the deepest hole was  $-0.285 \text{ e}/\text{\AA}^{-3}$ . On the basis of the final model, the calculated density is  $1.408 \text{ g cm}^{-3}$  and  $F(000) = 933.7$ . This slightly high  $R_1$  was due to the disordered of DMSO molecule as a solvent. The crystal structure of **5a** has been shown below using OLEX2.<sup>22</sup> The details of the crystallographic data are listed in Table S1.

**Table S1.** Crystal data and structure refinement for **5a**

|                      |                             |                            |
|----------------------|-----------------------------|----------------------------|
| CCDC Number          | <b>1832278</b>              |                            |
| Empirical formula    | $C_{23}H_{19}N_4O_4S$       |                            |
| Formula weight       | 447.92                      |                            |
| Temperature          | 273(2) K                    |                            |
| Wavelength           | 0.71073 Å                   |                            |
| Crystal system       | Monoclinic                  |                            |
| Space group          | P 21/n                      |                            |
| Unit cell dimensions | $a = 9.3279(6) \text{ Å}$   | $\alpha = 90^\circ$ .      |
|                      | $b = 21.2988(14) \text{ Å}$ | $\beta = 113.536(2)^\circ$ |

|                                   |                                                              |
|-----------------------------------|--------------------------------------------------------------|
|                                   | $c = 11.6031(8) \text{ \AA}$ $\gamma = 90^\circ$             |
| Volume                            | $2113.5(2) \text{ \AA}^3$                                    |
| Z                                 | 4                                                            |
| Density (calculated)              | 1.408 Mg/m <sup>3</sup>                                      |
| Absorption coefficient            | 0.192 mm <sup>-1</sup>                                       |
| F(000)                            | 933.7                                                        |
| Crystal size                      | 0.4 x 0.1 x 0.1 mm <sup>3</sup>                              |
| Theta range for data collection   | 2.566 to 25.000°                                             |
| Index ranges                      | $-11 \leq h \leq 11, -25 \leq k \leq 25, -13 \leq l \leq 13$ |
| Reflections collected             | 49871                                                        |
| Independent reflections           | 3710 [R(int) = 0.0584]                                       |
| Completeness to theta = 25.000°   | 99.7 %                                                       |
| Absorption correction             | Semi-empirical from equivalents                              |
| Refinement method                 | Full-matrix least-squares on F <sup>2</sup>                  |
| Data / restraints / parameters    | 3710 / 102 / 336                                             |
| Goodness-of-fit on F <sup>2</sup> | 1.068                                                        |
| Final R indices [I > 2sigma(I)]   | R1 = 0.0475, wR2 = 0.0983                                    |
| R indices (all data)              | R1 = 0.0873, wR2 = 0.1122                                    |
| Extinction coefficient            | 0.0061(8)                                                    |
| Largest diff. peak and hole       | 0.215 and -0.285 e. <sup>+</sup> Å <sup>-3</sup>             |

## REFERENCES:

- (17) APEX3; Bruker AXS inc.: Madison, Wisconsin, USA.
- (18) Sheldrick, G.M. SHELXS-97, Program for Crystal Structure and Refinement; University of Göttingen: Göttingen, Germany, 1997.
- (19) Krause, L.; Herbst-Irmer, R.; Sheldrick, G.M.; Stalke, D., *J. Appl. Cryst.* 2015, **48**, 3-10.
- (20) Sheldrick, G.M. SHELX XT. *Acta Crystallogr., Sect.A: Found. Adv.* 2015, **17**, 3-8.

(21) Sheldrick, G.M. SHELX XT. *Acta Crystallogr., Sect. A: Found. Crystallogr.* 2008, **64**, 112-122.

(22) Dolomanov, O.V.; Bourhis, L.J.; Gildea, R. J.; Howard, J.A.K.; Puschmann, H. OLEX2: a complete structure solution, refinement and analysis program. *J. Appl. Crystallogr.* 2009, **42**, 339-341.
